1  
2  
3  
4  
5  
6  
7  
8  
9  
10  
11  
12  
13  
14  
15  
16  
17  
18  
19  
20  
21  
22  
23  
24  
25  
26  
27  
28  
29

# Standard multiscale entropy reflects neural dynamics at mismatched temporal scales: What’s signal irregularity got to do with it?

Short title: Multi-scale entropy relations to spectral power

Julian Q. Kosciessa<sup>123\*</sup>, Niels A. Kloosterman<sup>12</sup>, and Douglas D. Garrett<sup>12\*</sup>

<sup>1</sup>Max Planck UCL Centre for Computational Psychiatry and Ageing Research, Berlin, Germany

<sup>2</sup>Center for Lifespan Psychology, Max Planck Institute for Human Development, Berlin, Germany

<sup>3</sup>Department of Psychology, Humboldt-Universität zu Berlin, Berlin, Germany

\* Corresponding authors: [kosciessa@mpib-berlin.mpg.de](mailto:kosciessa@mpib-berlin.mpg.de); [garrett@mpib-berlin.mpg.de](mailto:garrett@mpib-berlin.mpg.de)

## Author ORCIDs

Julian Q. Kosciessa – <http://orcid.org/0000-0002-1134-7996>

Niels A. Kloosterman – <http://orcid.org/0000-0002-1134-7996>

Douglas D. Garrett – <https://orcid.org/0000-0002-0629-7672>

## Keywords

multiscale sample entropy; irregularity; resting state EEG; age differences; rhythms

## 30 **Abstract**

31           Multiscale Entropy (MSE) is used to characterize the temporal irregularity of neural  
32 time series patterns. Due to its' presumed sensitivity to non-linear signal characteristics, MSE  
33 is typically considered a complementary measure of brain dynamics to signal variance and  
34 spectral power. However, the divergence between these measures is often unclear in  
35 application. Furthermore, it is commonly assumed (yet sparingly verified) that entropy  
36 estimated at specific time scales reflects signal irregularity at those precise time scales of brain  
37 function. We argue that such assumptions are not tenable. Using simulated and empirical  
38 electroencephalogram (EEG) data from 47 younger and 52 older adults, we indicate strong and  
39 previously underappreciated associations between MSE and spectral power, and highlight how  
40 these links preclude traditional interpretations of MSE time scales. Specifically, we show that  
41 the typical definition of temporal patterns via "similarity bounds" biases coarse MSE scales –  
42 that are thought to reflect slow dynamics – by high-frequency dynamics. Moreover, we  
43 demonstrate that entropy at fine time scales – presumed to indicate fast dynamics – is highly  
44 sensitive to broadband spectral power, a measure dominated by low-frequency contributions.  
45 Jointly, these issues produce counterintuitive reflections of frequency-specific content on MSE  
46 time scales. We emphasize the resulting inferential problems in a conceptual replication of  
47 cross-sectional age differences at rest, in which scale-specific entropy age effects could be  
48 explained by spectral power differences at mismatched temporal scales. Furthermore, we  
49 demonstrate how such problems may be alleviated, resulting in the indication of scale-specific  
50 age differences in rhythmic irregularity. By controlling for narrowband contributions, we  
51 indicate that spontaneous alpha rhythms during eyes open rest transiently reduce broadband  
52 signal irregularity. Finally, we recommend best practices that may better permit a valid  
53 estimation and interpretation of neural signal irregularity at time scales of interest.

## 54 **Author Summary**

55           Brain signals exhibit a wealth of dynamic patterns that that are thought to reflect  
56 ongoing neural computations. Multiscale sample entropy (MSE) intends to describe the  
57 temporal irregularity of such patterns at multiple time scales of brain function. However, the  
58 notion of time scales may often be unintuitive. In particular, traditional implementations of  
59 MSE are sensitive to slow fluctuations at fine time scales, and fast dynamics at coarse time  
60 scales. This conceptual divergence is often overlooked and may lead to difficulties in  
61 establishing the unique contribution of MSE to effects of interest over more established spectral  
62 power. Using simulations and empirical data, we highlight these issues and provide evidence  
63 for their relevance for valid practical inferences. We further highlight that standard MSE and  
64 traditional spectral power are highly collinear in our example. Finally, our analyses indicate  
65 that spectral filtering can be used to estimate temporal signal irregularity at matching and  
66 intuitive time scales. To guide future studies, we make multiple recommendations based on our  
67 observations. We believe that following these suggestions may advance our understanding of  
68 the unique contributions of neural signal irregularity to neural and cognitive function across the  
69 lifespan.

## 70 Introduction

### 71 Entropy as a measure of signal irregularity

72 Neural time series exhibit a wealth of dynamic patterns that are thought to reflect  
 73 ongoing neural computations. While some of these patterns consist of stereotypical deflections  
 74 [e.g., periodic neural rhythms; 1, 2], the framework of nonlinear dynamics and complex systems  
 75 also emphasizes the importance of temporal irregularity (or variability) for healthy, efficient,  
 76 and flexible neural function [3-6]. Specifically, functional network dynamics may reflect the  
 77 non-linear interaction of local and global population activity, for which intermediate levels of  
 78 network noise theoretically afford high network capacity and dynamic range [7-10]. In parallel  
 79 with such conceptual advances, multiscale entropy (MSE) [11, 12], an information-theoretic  
 80 index that estimates sample entropy [13] at multiple time scales (Fig 1A), has become a  
 81 promising tool to quantify the irregularity of neural time series across different brain states, the  
 82 lifespan, and in relation to health and disease [14-22]. However, we argue that outstanding  
 83 methodological issues regarding the mapping of neural-to-MSE time scales reduce the current  
 84 interpretability of MSE results, and – if not properly accounted for – limit MSE’s utility for  
 85 investigating substantive neurocomputational questions of interest.  
 86

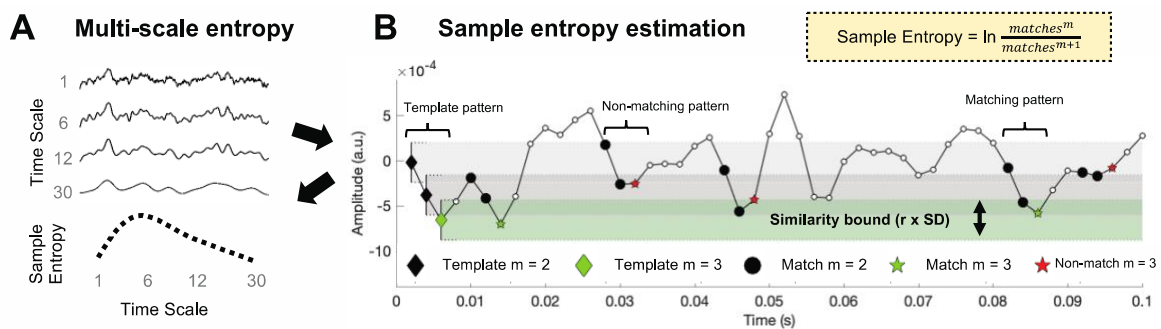

87  
 88 **Fig 1.** Traditional MSE estimation procedure. (A) Multi-scale entropy is an extension of sample entropy, an  
 89 information-theoretic metric intended to describe the temporal irregularity of time series data. To estimate entropy  
 90 for different time scales, the original signal is traditionally ‘coarse-grained’ using low-pass filters, followed by the  
 91 calculation of the sample entropy. (B) Sample entropy estimation procedure. Sample entropy measures the  
 92 conditional probability that two amplitude patterns of sequence length  $m$  (here, 2) remain similar (or matching)  
 93 when the next sample  $m + 1$  is included in the sequence. Hence, sample entropy increases with temporal  
 94 irregularity, i.e., with the number of  $m$ -length patterns that do not remain similar at length  $m+1$  (non-matches). To  
 95 discretize temporal patterns from continuous amplitudes, similarity bounds (defined as a proportion  $r$ , here .5,  
 96 of the signal’s standard deviation [SD]) define amplitude ranges around each sample in a given template sequence,  
 97 within which matching samples are identified in the rest of the time series. These are indicated by horizontal grey  
 98 and green bars around the first three template samples. This procedure is applied to each template sequence in  
 99 time, and the pattern counts are summed to estimate the signal’s entropy. The exemplary time series is a selected  
 100 empirical EEG signal that was 40-Hz high-pass filtered with a 6th order Butterworth filter.

101  
 102 In general, sample entropy quantifies the irregularity of temporal patterns in a given  
 103 signal (for an example of its calculation, see Fig 1B). Whereas signals with a repetitive structure  
 104 (like stationary signals or rhythmic fluctuations) are estimated as having low entropy, less  
 105 predictable (or random) signals are ascribed high entropy. As an extension of this principle,  
 106 MSE aims to describe temporal irregularity at different time scales – varying from fine (also

107 referred to as ‘short’) to coarse (or ‘long’). In conventional Fourier analysis of time series data,  
108 time scales are quantified in terms of lower and higher frequencies present in the signal. This  
109 has been shown to be a principled time scale descriptor that relates at least in part to structural  
110 properties of the generating neural circuits [2, 23-26]. Given this meaningful definition of fast  
111 and slow events, it is a common assumption – including in guides to MSE’s interpretation in  
112 neural applications [27] – that fine-to-coarse scales characterize the irregularity of high-to-low  
113 frequency dynamics, respectively. However, here we highlight one methodological and one  
114 conceptual issue regarding the computation of MSE that challenge such a direct scale-to-  
115 frequency mapping. First, we show that the traditional definition of temporal patterns may lead  
116 to an influence of high frequencies on coarse entropy time scales (Issue 1). Second, we highlight  
117 that the signal content at fine time scales renders entropy estimates sensitive to a conjunction  
118 of scale-free and narrowband signals, including slow fluctuations (Issue 2).

119 Due to its assessment of temporal patterns rather than sinusoidal oscillatory dynamics,  
120 MSE has been motivated as a complementary measure to spectral variance/power that is  
121 sensitive to multi-scale, potentially non-linear, signal characteristics, such as phase shifts or  
122 cross-frequency coupling. [Note that we use the terms power and variance interchangeably, as  
123 a time domain signal’s broadband variance is proportional to the integral of its power spectral  
124 density, while narrowband variance in the time domain is identical to narrowband power in the  
125 spectral domain.] However, the overlap between these measures is often unclear in application  
126 because the mapping between spectral power and scale-wise entropy is ambiguous. Such  
127 ambiguity affects both the ability to compare individuals at any scale, and the ability to compare  
128 entropy levels across scales within person. We argue that a clarification of these issues is thus  
129 necessary for valid inferences of time scale-specific ‘neural irregularity’ in a growing number  
130 of neuroscientific MSE applications.

### 131 **Issue 1: Global similarity bounds introduce a scale-dependent variance bias**

132 A principle assumption of sample entropy is that “the degree of irregularity of a complex  
133 signal [...] cannot be entirely captured by the SD [i.e., standard deviation]” [28; i.e., square root  
134 of variance]. To ensure this, sample entropy is typically assessed relative to the standard  
135 deviation of the broadband signal to intuitively normalize the estimation of irregularity for  
136 overall distributional width [13, 14, see also 28]. In particular, the *similarity bound* – defined  
137 by a constant  $r$ , by which the signal SD is multiplied – reflects the tolerance for labeling time  
138 points as being similar or different, and thus, determines how liberal the algorithm is towards  
139 detecting ‘matching patterns’ (Fig 2A-C). While wider bounds decrease entropy estimates,  
140 narrower bounds increase them [13, 29, 30] (S2 Figure). Crucially, the similarity bound is often  
141 not equally liberal across time scales, resulting in an entropy estimation bias. Specifically, to  
142 characterize temporal irregularity at coarser time scales, signals are typically successively low-  
143 pass filtered [or ‘coarse-grained’; 31] (Fig 2D), whereas the similarity bound typically (in its  
144 ‘Original’ implementation) is set only once – namely relative to the SD of the original unfiltered  
145 signal. Due to the progressive filtering, coarse-graining successively reduces the signal’s SD,  
146 yet a single global (i.e., scale-invariant) similarity bound remains based on the cumulative  
147 variance of all estimable frequencies (Fig 2D and E). As a result, the similarity bound becomes  
148 increasingly liberal towards pattern similarity at coarser scales, thereby reducing entropy

149 estimates. This is most clearly illustrated by the observation that white noise signals, which  
 150 should be characterized as equally random at each time scale, exhibit decreasing entropy values  
 151 towards coarser scales when global *similarity bounds* are used [27, 29, 32]. This issue has been  
 152 recognized previously [29], and provided a rationale for recomputing the *similarity bound* for  
 153 each time scale [29, 33-35]. But despite the benefits of this refinement that was already  
 154 proposed fifteen years ago, our review of the literature revealed that the use of global bounds  
 155 remains dominant in over 90% of neuroscientific MSE applications (see S1 File) and in  
 156 previous validation work [27]. Crucially, the consequences of this bias for practical inference  
 157 remain unclear. We therefore argue that a comprehensive assessment of the resulting bias is  
 158 needed to highlight this issue, both to clarify previous results and to guide future studies.  
 159

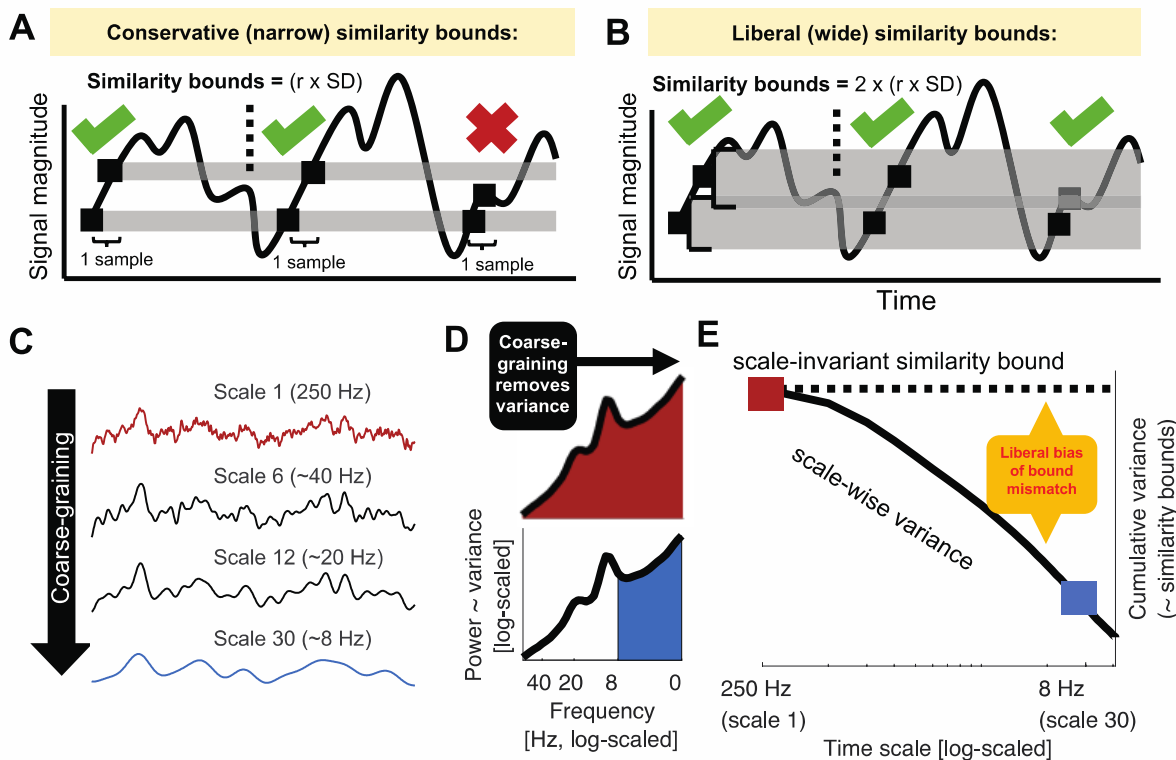

160  
 161 **Fig 2.** Issue 1: Global similarity bounds systematically confound the entropy of coarse-scale signals with removed  
 162 spectral power. (A, B) Similarity bounds constrain sample entropy as shown schematically for entropy estimation  
 163 using narrower (A) and wider (B) similarity bounds. For clarity, only a subset of pattern matches (green ticks) and  
 164 mismatches (red cross) are indicated for a sequence length  $m = 1$  (cf. Fig 1B). Wider, more liberal similarity bounds  
 165 indicate more pattern matches than narrow, conservative bounds, thereby decreasing entropy. S2 Figure shows the  
 166 empirical link between liberal similarity bounds and sample entropy estimates. (C-E) Divergence between global  
 167 similarity bounds and scale-wise signal SD biases coarse-scale entropy. (C) Coarse-graining (see Figure 1A)  
 168 progressively reduces variance from the original broadband signal (as shown in panel E). (D) At original sampling  
 169 rates (i.e., time scale 1; marked red in panels DE and F), neural signal variance is usually composed of broadband  
 170  $1/f$  content and narrowband rhythmic peaks. Note that the x-axis plots decreasing frequencies to align with the  
 171 traditional MSE low-pass filter direction. Towards coarser scales (e.g., scale 30; marked blue in CD and E), signal  
 172 variance progressively decreases, as the signal becomes more specific to low frequencies. (E) Due to the systematic  
 173 and cumulative reduction of variance in scale-wise signals, global similarity bounds become liberally biased  
 174 ('broad'). Critically, systematic differences in the magnitude of this bias (e.g., due to different spectral slopes)  
 175 introduce systematic entropy differences at coarser scales.

176 **Issue 2: Traditional scale definitions lead to diffuse time scale reflections of spectral**  
177 **content**

178 While matched similarity bounds account for *total signal variation* at any specific time  
179 scale, sample entropy remains related to *the variance structure* (i.e., the power spectrum) of the  
180 signal as *one* indicator of its temporal irregularity [4]. Most neural signals exhibit a scale-free  
181  $\frac{1}{f^x}$  power distribution [36-38], for which the exponent  $x$  indicates the prevalence of low-to-high-  
182 frequency components in the signal. This ratio is also referred to as the power spectral density  
183 (PSD) slope. Smaller exponents (indicating shallower PSD slopes) characterize signals with  
184 relatively strong high-frequency contributions (i.e., reduced temporal autocorrelations, and less  
185 predictability) compared to larger exponents that indicate steeper slopes. This conceptual link  
186 between PSD slopes (or high-to-low frequency power ratios that may have strong broadband  
187 slope contributions [39]) and sample entropy has been empirically observed across subjects,  
188 wakefulness and task states [14, 17, 40]. However, the sensitivity of fine-scale entropy to PSD  
189 slopes – a multi-scale characteristic – highlights that the contribution of slow-to-fast signal  
190 content to fine-scale entropy is unclear. This ambiguity arises from the algorithm that derives  
191 scale-wise signals. In particular, ‘Original’ MSE implementations use low-pass filters to derive  
192 signals at coarser time scales, which increasingly constrains entropy estimates to slower  
193 fluctuations. As such, each scale defines an upper bound for the range of included frequencies  
194 (see methods). However, the opposite is not true, resulting in a lack of high-frequency  
195 specificity. Hence, finer time scales characterize the *entire* broadband signal (see Fig 3A) which  
196 represents a non-specific mixture of low and high-frequency elements across scale-free and  
197 rhythmic signal contributions [41, 42]. Crucially, the contribution of these elements to neural  
198 broadband signals is not equal. Rather, the variance of  $\frac{1}{f^x}$  signals is dominated by the amplitude  
199 of low frequencies, which may thus disproportionately impact the assessment of pattern  
200 irregularity [35]. As a result, broadband signal characterization challenges the assumption that  
201 fine-scale entropy mainly describes ‘fast’ events. More generally, this highlights large  
202 uncertainty regarding the frequencies that are represented at *any* particular time scale.  
203

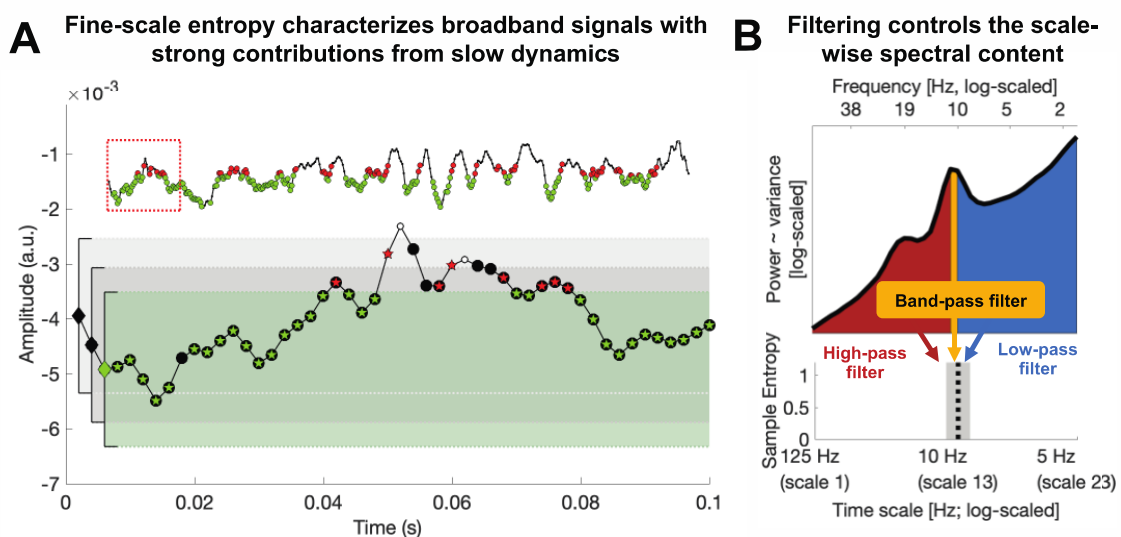

204

205 **Fig 3.** Issue 2: Traditional scale derivation leads to diffuse time-scale reflections of spectral power. (A) Exemplary  
206 sample entropy estimation in the same empirical EEG signal shown in Fig 1B, but without application of a high-  
207 pass filter, thus including dominant slow dynamics. See Figure 1B for a legend of the Figure elements. In brief,  
208 green elements indicate pattern matches at  $m+1$ , whereas red elements indicate pattern mismatches at  $m+1$ . In the  
209 presence of large low-frequency fluctuations, sample entropy at fine scales (here scale 1) may to a large extent  
210 characterize the temporal regularity of slow dynamics. Note that this is not a case of biased similarity bounds, but  
211 a desired adjustment to the large amplitude of slow fluctuations. The inset shows an extended segment (800 ms)  
212 of the same signal, allowing for an assessment of the slower signal dynamics. The red box indicates the 100 ms  
213 signal shown in the main plot. (B) A scale-wise filter implementation controls the scale-wise spectral content, as  
214 schematically shown here for the filter-dependent representation of spectral content at a time scale of  
215 approximately 10 Hz (for a note on the x-axis labeling, see methods: *Calculation of multi-scale sample entropy*).  
216 Traditionally, low-pass filters are used to derive coarser scales, which introduces a sensitivity to slower  
217 fluctuations. However, other filter implementations can be used to e.g., investigate the pattern irregularity of fast  
218 signal variations. No matter whether low or high pass filters are used, the spectral content influencing entropy  
219 estimates is by definition not specific to any particular time scale; band-pass filters provide one viable solution  
220 permitting such specificity.

221  
222 The projection of narrowband rhythms into simulated noise signals [1, 36, 43] provides a  
223 well-controlled situation in which to study the mapping of neural irregularity to MSE, due to  
224 their clearly defined time scale (i.e., period = inverse of frequency) and regularity (added  
225 rhythmic variance = more regular signal = decreased entropy). Moreover, rhythmic structure  
226 remains a dominant target signal in neuroscience for which entropy, as a complementary  
227 descriptor, should provide an anti-correlated reflection. However, previous simulations on the  
228 mapping of rhythms onto MSE time scales have produced puzzling results that have received  
229 little attention in the literature so far; while a linear mapping between rhythmic frequency and  
230 entropy time scales has been observed, added rhythmic regularity has been shown to *increase*  
231 entropy above baseline in previous work [4, 22, 44]. This notably contrasts with the intuition  
232 that added signal regularity should reduce observed entropy. Thus, additional simulations are  
233 necessary to assess the intuitive notion that rhythmicity should be anticorrelated with entropy,  
234 and to investigate whether this phenomenon indeed occurs at specific time scales, as previously  
235 assumed [4, 22, 44]. In particular, we probed the feasibility of using high-pass and band-pass  
236 filters (relative to standard low-pass options) to control the MSE time scales at which  
237 rhythmicity would be reflected (Fig 3B).

238 In summary, Issue 1 suggests a coarse-scale bias introduced by global similarity bounds,  
239 and Issue 2 highlights a mixture of narrow- and broadband contributions to fine scales. In worst-  
240 case scenarios, a conjunction of these issues may lead to a reflection of fast dynamics in coarse  
241 entropy and a reflection of slow dynamics in fine entropy, thus paradoxically *inverting* the  
242 intuitive time scale interpretation. These issues have not been jointly assessed, however, and  
243 there is little evidence of whether and how these methodological issues may impact practical  
244 inferences motivated by neurobiological questions of interest. We focus on two example  
245 scenarios in the current study.

## 246 **Impact of issues on practical inferences: (1) age differences in neural irregularity at fast** 247 **and slow time scales**

248 One principal application of multiscale entropy is in the domain of lifespan covariations  
249 between neural dynamics and structural brain network ontogeny [for a review see 45]. Within



250 this line of inquiry, it has been proposed that structural brain alterations across the lifespan  
251 manifest as entropy differences at distinct time scales [16, 18, 40, 46]. Specifically, it has been  
252 suggested that coarse-scale entropy decreases and fine-scale entropy rises with increasing adult  
253 age as a reflection of senescent shifts from global to increasingly local information processing  
254 [16, 18]. Crucially, this mirrors observations based on spectral power, where age-related  
255 decreases in the magnitude of low-frequencies [47, 48] are accompanied by increases in high-  
256 frequency activity, conceptualized also as a flattening of power spectral density (PSD) slopes  
257 [16, 18, 40, 49]. These results seemingly converge towards a joint decrease of low-frequency  
258 power and coarse-scale entropy in older adults (and an increase for both regarding fast  
259 dynamics). However, this correspondence is surprising upon closer inspection given the  
260 presumed anticorrelation between the magnitude of signal regularity (as indicated by  
261 heightened spectral power) and entropy. In light of concerns regarding the interpretation of  
262 entropy time scales (see above), we assessed cross-sectional age effects on both MSE and  
263 spectral power as a test case for potential mismatches in scale-dependent inferences.

## 264 **Impact of issues on practical inferences: (2) narrowband modulations of broadband** 265 **irregularity**

266 Identifying the time scale contributors to MSE is further relevant due to the assumed  
267 functional separability of narrow- and broadband brain dynamics. Whereas narrowband  
268 rhythms have been closely associated with synchronous population spiking at the service of  
269 temporal information coordination [50], scale-free broadband dynamics may provide a  
270 complementary index of the level of neocortical activation and aggregate spiking activity in  
271 humans [38, 51-53]. In particular, shallower PSD slopes have been proposed as a signature of  
272 enhanced cortical excitability (or ‘neural noise’) [54]. Such excitability in turn may regulate the  
273 available range of network dynamics as reflected in information entropy [10]. Notably,  
274 interactions between narrow- and broadband activity are neurobiologically expected. In  
275 particular, as the magnitude of narrowband alpha synchronization increases, population output  
276 is thought to decrease [55]. However, the methodological conflation of narrow- and broadband  
277 contributions to entropy (see “Issue 2” above) may complicate principled investigations  
278 regarding their neurobiological coupling in practice. As a corollary goal in the present work,  
279 we therefore investigate whether a principled separation of narrow- and broadband  
280 contributions to entropy is tractable.

## 281 **Current study**

282 Here, we aimed to address two issues of frequency-to-scale mapping and their relevance  
283 for empirical applications. First, we simulated variations in rhythmic power and frequency to  
284 probe the relationship between rhythmicity and MSE time scales. Primarily, our goal was to  
285 assess how global similarity bounds (Issue 1) and the scale-wise spectral content of the analyzed  
286 signal (Issue 2) influence the time scales at which added rhythmicity is observed. Then, we  
287 attempted to replicate reported cross-sectional age differences in human  
288 electroencephalography (EEG) signals recorded during rest. We assessed whether younger  
289 adults would show increased coarse scale and decreased fine-scale entropy compared to older

290 adults, and we probed the extent to which such scale-specific results depend on mismatched  
 291 spectral power via the issues above. As corollary goals, we assessed the potential of band-pass  
 292 and band-stop approaches for deriving more intuitive insights regarding the time scales of signal  
 293 irregularity. First, we probed the potential of ‘frequency-specific’ estimates of signal  
 294 irregularity via band-pass filters, and assessed age differences therein. Second, we assessed the  
 295 relation between alpha rhythms and broadband signal irregularity, after accounting for their  
 296 methodological coupling. We refer to traditional settings that use global bounds and low-pass  
 297 filtering as ‘Original’ throughout the remainder of the manuscript (see methods for details).

## 298 Results

### 299 Simulations indicate a diffuse mapping between rhythmicity and MSE time scales as a 300 function of global similarity bounds and spectral signal content

301 Our first aim was to probe how scale-specific events, namely rhythms of a given frequency,  
 302 modulate MSE time scales. For this purpose, we simulated 10 Hz (alpha) rhythms of varying  
 303 power on top of pink noise and calculated the MSE of those signals. First, we probed the  
 304 influence of global similarity bounds (as used in ‘Original’ implementations) on the time scale  
 305 mapping (Issue 1). Crucially, as a result of using a global similarity bound for all time scales,  
 306 strong rhythmic power decreased MSE estimates across a range of time scales, including time  
 307 scales at which added 10 Hz rhythmicity did not contribute to the scale-wise signal (Fig 4A,  
 308 upper panel). As highlighted in Issue 1, this can be explained by a general increase in the  
 309 liberality of bounds (Fig 4A, lower panel) that introduced a bias on coarse-scale entropy below  
 310 10 Hz. In contrast, when scale-dependent similarity bounds were used with low-pass filters (Fig  
 311 4BC), strong rhythmicity systematically affected entropy only at finer time scales than the  
 312 simulated frequency (i.e., to the left of the vertical line in Fig 4C, albeit in a diffuse manner,  
 313 which we will examine next).

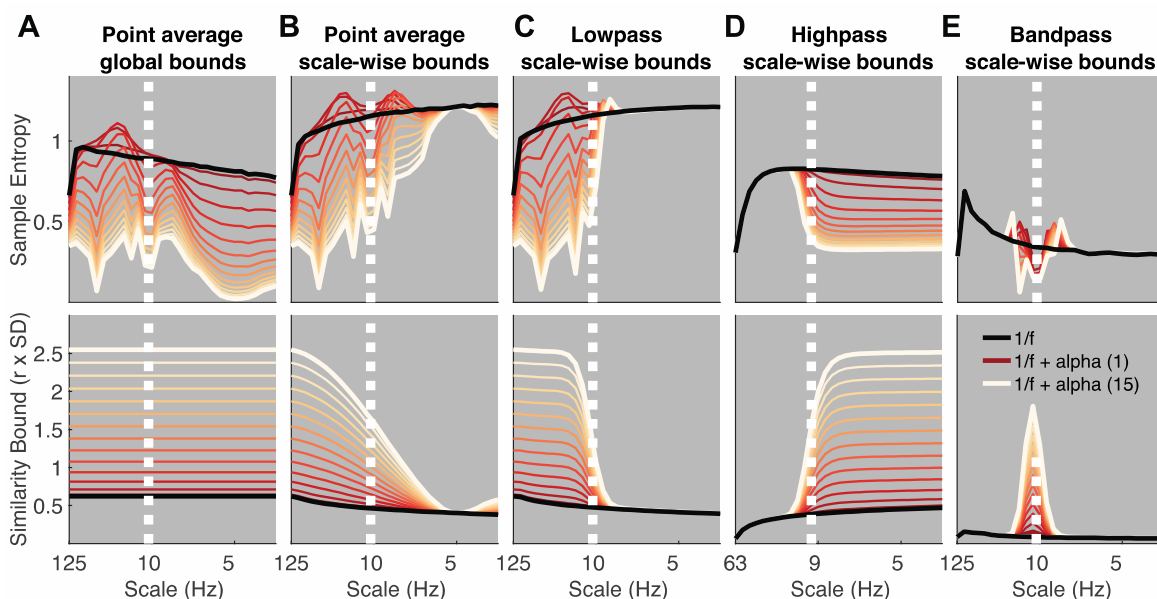

314 **Fig 4. Rhythmic power manifests at different time scales depending on filter choice and similarity bound.**  
 315 Simulations indicate at which time scales the addition of varying magnitudes of stereotypic narrowband 10 Hz  
 316

317 rhythms (red-to-white line color gradient) modulate entropy compared to the baseline 1/f signal (black line).  
318 Simulations indicate that increases in rhythmicity strongly reduce entropy estimates alongside increases in the  
319 similarity bound. The affected scales vary as a function of global vs. scale-dependent similarity bounds and the  
320 spectral filtering used to derive coarser time scales. Crucially, in ‘Original’ implementations, added narrowband  
321 rhythmicity decreased entropy with low scale-specificity, in line with global increases in the similarity bound (A).  
322 In contrast, the use of scale-varying thresholds (B) and dedicated filtering (C-E) increased specificity regarding  
323 the time scales at which rhythmicity was reflected. Note that timescales are presented in Hz to facilitate the visual  
324 assessment of rhythmic modulation. For all versions except high pass, the scale represents the upper Nyquist bound  
325 of the embedding dimension. For the high pass variant, the scale represents the high pass frequency (see methods).  
326 Time scales are log-scaled. Spectral attenuation properties of the Butterworth filters are shown in S4 Figure.

327 Second, we assessed the influence of the scale-wise filters (and hence, the spectral signal  
328 content) on frequency-to-scale mapping (see Issue 2, Fig 3B). In particular, we expected that  
329 low-pass filters (A-C) would lead to entropy decreases at finer time scales than the simulated  
330 frequency, whereas high-pass filters would lead to a rhythm representation at coarser time  
331 scales (Fig 3B). In line with these expectations, low-pass filters constrained the influence of  
332 narrowband rhythms to finer time scales (Fig 4C). As in previous work [33], Butterworth filters  
333 (Fig 4C) improved the removal of 10 Hz rhythms at coarser time scales and produced less  
334 aliasing compared with ‘Original’ point-averaging (see methods, Fig 4AB), with otherwise  
335 comparable results. Hence, low-pass filters rendered multiscale entropy sensitive to variance  
336 from low frequencies, suggesting that slow events (e.g. event-related potentials) are reflected  
337 in a diffuse manner across time scales. In contrast, high-pass filters constrained rhythm-induced  
338 entropy decreases to coarser time scales that included 10 Hz signal content, hence leading to  
339 estimates of high frequency entropy that were independent of low frequency power (Fig 4D).  
340 Finally, when band-pass filters were used (Fig 4E), rhythmicity decreased sample entropy at  
341 the target scales (despite producing edge artifacts surrounding the time scale of rhythmicity).  
342 In sum, these analyses highlight that rhythmic power increases will diffusely and non-  
343 specifically modulate MSE time scales as a function of the coarse-graining filter choice, unless  
344 a narrowband filter is applied.

345 Such diffuse reflection of rhythms across MSE time scales is at odds with previous  
346 simulations suggesting a rather constrained, linear mapping between the frequency of simulated  
347 rhythms and entropy time scales [4, 22, 44]. Furthermore, those studies indicated entropy  
348 *increases* with added rhythmicity, in contrast with the marked (and expected) decreases in  
349 entropy observed here. Crucially, increased entropy relative to baseline runs counter to the idea  
350 that the addition of a stereotypic pattern should decrease rather than increase pattern  
351 irregularity. To assess whether these seemingly divergent results can be reconciled, we repeated  
352 our simulation for different frequencies. We focused on a comparatively low level of  
353 rhythmicity (amplitude level = 2; SNR ~ 1.3 (see methods); S3 Figure displays exemplary time  
354 series), for which Fig 4A-C suggested transient entropy increases above baseline. Similar to  
355 previous reports, we observed a positive association between simulated frequencies and peak  
356 entropy time scales (Fig 5) across implementations, such that rhythms of a given frequency  
357 increased entropy at slightly finer time scales (see increases in entropy above baseline to the  
358 left of the dotted vertical lines in Fig 5A-C). However, as shown in Fig 4A-C, such increases  
359 were counteracted when rhythmic strength increased, while global *similarity bounds* (Fig 5A)  
360 liberally biased, and thus decreased, entropy at coarser time scales (i.e., to the right of the dotted  
361 lines in Fig 5A) independent of rhythmic strength. While the mechanistic origin of entropy

362 increases remains unclear, previous conclusions may thus have overemphasized the scale-  
 363 specificity of rhythmic influences.  
 364

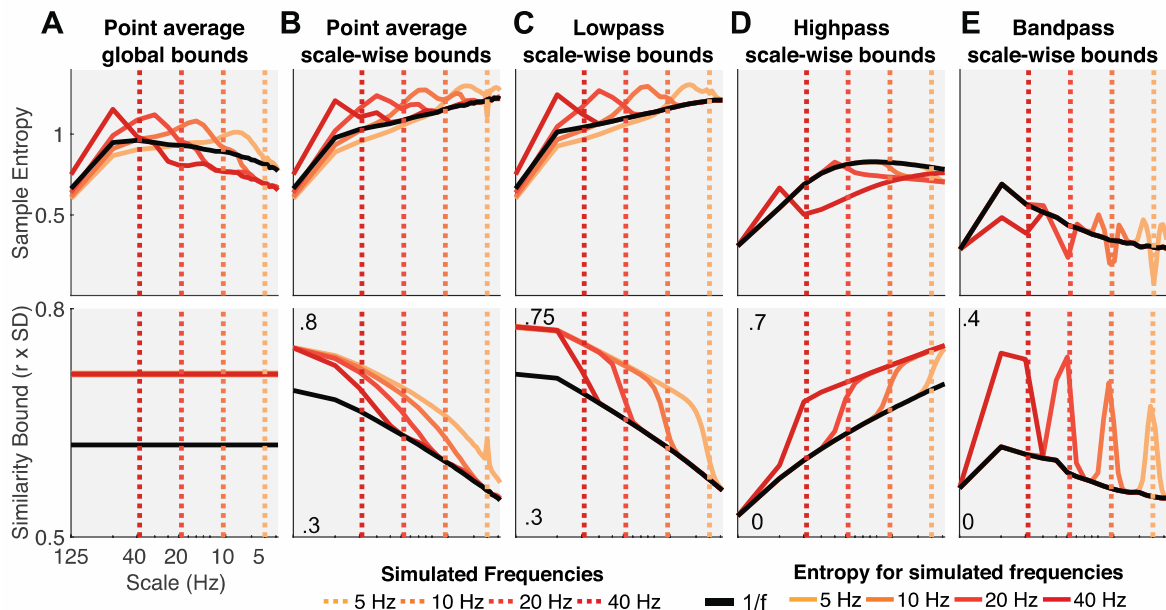

365  
 366 **Fig 5. Influence of rhythmic frequency on MSE estimates and similarity bounds across different MSE**  
 367 **variants.** Simulations of different frequencies indicate a linear frequency-to-scale mapping of simulated sinusoids.  
 368 Broken vertical lines indicate the simulated frequency. Low-pass MSE variants show increased entropy at time  
 369 scales finer than the simulated frequency in combination with a global entropy decrease. Low-, high- and  
 370 band-pass variants exhibit the properties observed in the alpha case, with a reduction above/below or at the simulated  
 371 frequency. Time scales are log-scaled.

372 In sum, our simulations highlight that the choice of similarity bound and the signal's spectral  
 373 content grossly affect one's ability to interpret MSE time scales. Our frequency-resolved  
 374 simulations suggest that a previously argued direct frequency-to-scale mapping is not tenable  
 375 when typical estimation procedures are used. Supplementing these narrowband contributions  
 376 to MSE, we report results from simulations of varying spectral slopes in Supplementary File 2  
 377 and Supplementary Figure 7.

### 378 **Probing the impact of spectral power on MSE in a cross-sectional age comparison**

379 Our simulations suggest profound influences of the choice of similarity bound (Issue 1) and  
 380 spectral content (Issue 2) on scale-dependent MSE estimates. However, whether these issues  
 381 affect inferences in empirical data remains unclear. Entropy differences across the lifespan are  
 382 an important application [6], where 'Original' MSE implementations suggest that older adults  
 383 exhibit higher entropy at finer time scales and lower entropy at coarser time scales compared  
 384 to younger adults [for a review see 45]. Importantly, a shallowing of PSD slopes with age has  
 385 also been reported, as represented by higher power at high frequencies and lower power at low  
 386 frequencies [40, 49]. The raised issues of a potential (1) reflection of high frequency power on  
 387 coarse scales and (2) diffuse reflection of slow spectral content thus question whether traditional  
 388 MSE group differences reflect veridical differences in signal irregularity at matching time  
 389 scales. Given those two issues, we specifically hypothesized that:

390

391 (A) Adult age differences in coarse-scale MSE can be accounted for by group differences in  
 392 high frequency power, due to the typical use of global similarity bounds (Issue 1).

393 (B) Adult age differences in fine-scale MSE reflect differences in PSD slopes and thus depend  
 394 on the contribution of low frequencies to broadband signals (Issue 2).

395

396 To assess these hypotheses, we first attempted to replicate previously reported scale-wise  
 397 age differences in MSE and spectral power during eyes open rest. ‘Original’ settings replicated  
 398 scale-dependent entropy age differences (Fig 6A1). Specifically, compared with younger  
 399 adults, older adults exhibited lower entropy at coarse scales, and higher entropy at fine scales  
 400 (Fig 6A1). Mirroring these results in spectral power, older adults had lower parieto-occipital  
 401 alpha power and increased frontal high frequency power (Fig 6A2) compared to younger adults.  
 402 This was globally associated with a shift from steeper to shallower PSD slopes with increasing  
 403 age (Fig 6D). At face value, this suggests joint shifts of both power and entropy, in the same  
 404 direction and at matching time scales. Crucially, however, the spatial topography of entropy  
 405 differences inverted the time scale of power differences (Fig 6B & C; cf., upper and lower  
 406 topographies), such that frontal high frequency power topographies resembled coarse entropy  
 407 topographies (Fig 6B), while parieto-occipital age differences in slow frequency power  
 408 resembled fine-scale entropy differences (Fig 6C). This rather suggests scale-mismatched  
 409 associations between entropy and power.

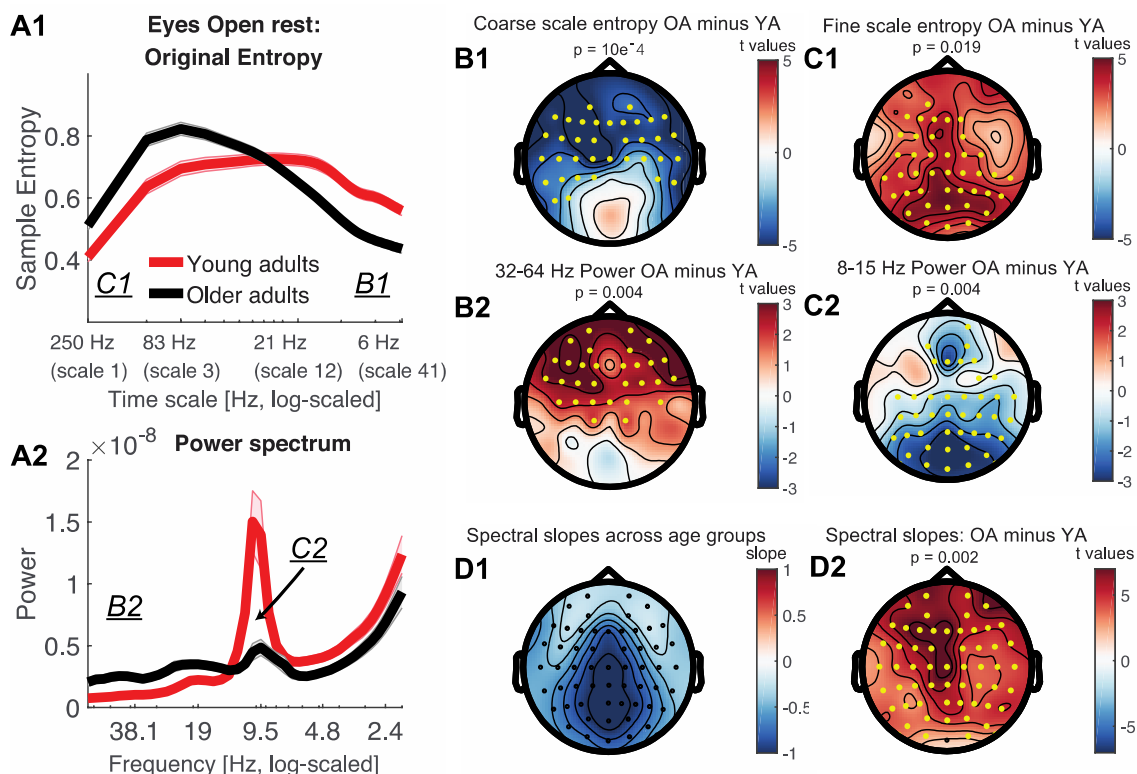

410

411 **Fig 6. Timescale-dependent age differences in spectral power and entropy during eyes open rest.** (A) MSE  
 412 (A1) and power (A2) spectra for the two age groups. Error bars show standard errors of the mean. Note that in  
 413 contrast to standard presentations of power, the log-scaled x-axis in A2 is sorted by decreasing frequency to enable  
 414 a better visual comparison with entropy time scales (see also Fig 2D). Similarly, the x-axis in A1 has been log-  
 415 scaled to allow easier visual comparison with log-scaled values in A2 and emphasize fine-scale differences (cf.  
 416 Fig 7A1). Inset labels refer to the approximate time scales across which topographies are plotted in B & C. T-  
 417 values of power age contrast are shown in S5 Figure. (B, C) Topographies of age differences indicate mirrored

418 age differences in fast entropy and low frequency power, as well as coarse entropy and high frequency power.  
 419 Significant differences are indicated by yellow dots. P-values correspond to the two/sided significance test of the  
 420 cluster-level statistic. (D1) Spectral slopes across age groups. (D2) Age differences in spectral slopes.

421 Next, we assessed the impact of scale-wise similarity bounds and different scale-wise filters  
 422 on the indication of MSE age differences (Fig 7).  
 423

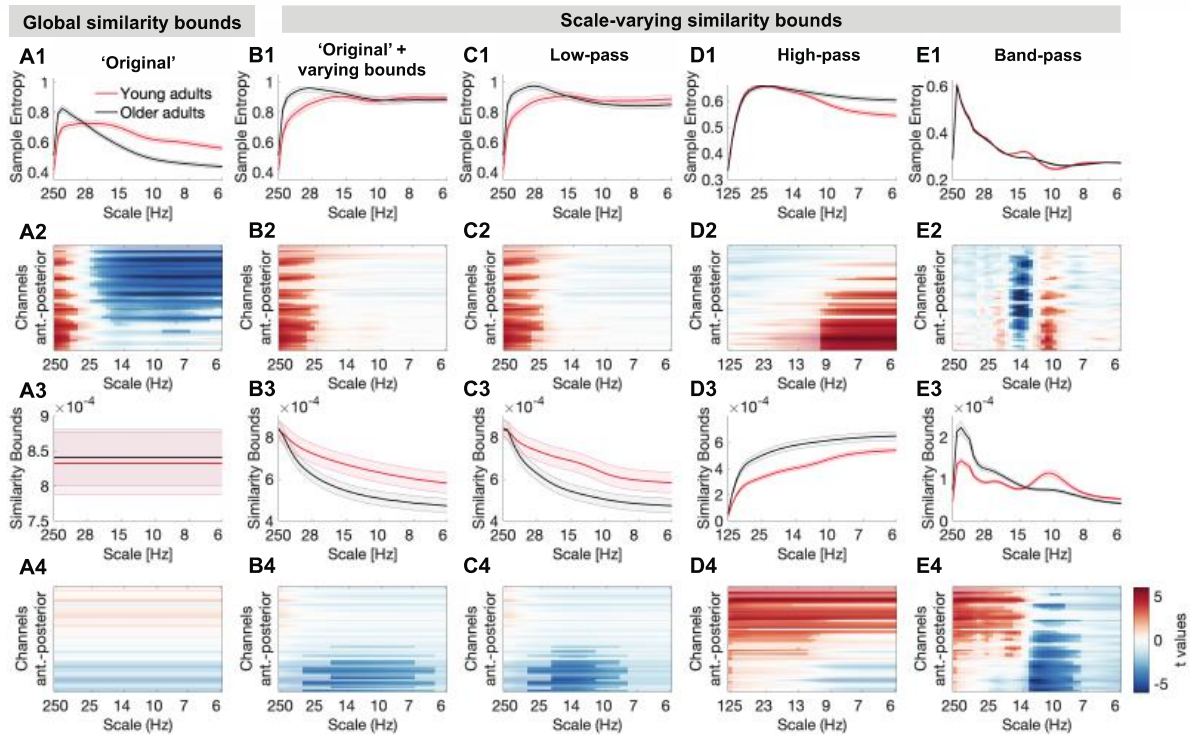

424 **Fig 7. Multiscale entropy age differences depend on the specifics of the estimation method.** Grand average  
 425 traces of entropy (1<sup>st</sup> row) and similarity bounds (3<sup>rd</sup> row) alongside t-maps from statistical contrasts of age group  
 426 differences (2<sup>nd</sup> + 4<sup>th</sup> row: younger minus older adults for entropy and bounds, respectively), shown by channel on  
 427 the y-axis. Age differences were assessed by means of cluster-based permutation tests and are indicated via  
 428 opacity. Original MSE (A) replicated reported scale-dependent age differences, with older adults exhibiting higher  
 430 entropy at fine scales and lower entropy at coarse scales, compared with younger adults. The coarse-scale  
 431 difference was exclusively observed when using global similarity bounds, whereas the fine-scale age difference  
 432 was indicated with all low-pass versions (A, B, C), but not when signals were constrained to high-frequency or  
 433 narrow-band ranges (D, E). In contrast, narrowband MSE indicated inverted age differences within the alpha and  
 434 beta band (E).

435 Briefly, we observed three main results that deserve highlighting:  
 436

- 437
- 438 (A) The implementation of scale-wise similarity bounds affected MSE age differences (Fig 7;  
 439 Hypothesis A; Issue 1). In particular, with global bounds, MSE indicated increased fine-  
 440 scale and decreased coarse-scale entropy for older compared to younger adults (Fig 7A1  
 441 and A2), in the absence of group differences in the global *similarity bound* (Fig 7A3 and  
 442 A4). In contrast, scale-varying bounds captured age differences in variance at finer scales  
 443 (Fig 7B) and abolished age differences in coarse-scale entropy (effect size was significantly  
 444 reduced from  $r = .58$  to  $r = .07$ ;  $p = 6.8 \times 10^{-5}$ ; see Statistical analyses).
- 445 (B) The chosen scale-wise filtering method also affected MSE age differences (Hypothesis B;  
 446 Issue 2). Specifically, fine-scale entropy age differences were indicated when low-pass

447 filters rendered those scales sensitive to low-frequency content (Fig 7B/C). Effect size did  
 448 not significantly change with the adoption of scale-varying similarity bounds (from  $r = .44$   
 449 to  $r = .45$ ;  $p=.934$ ). In contrast, when high-pass filters constrained fine scales to high  
 450 frequency signals (Fig 7D), no fine-scale age differences were observed and the age effect  
 451 was significantly reduced to  $r = .09$  ( $p = .008$ ).

452 (C) Strikingly, the implementation of narrowband filters (Fig 7E) indicated two unique age  
 453 effects not recoverable using other approaches: larger 'narrowband' alpha-band entropy  
 454 and lower beta-band entropy for older adults compared with younger adults.

455

456 In the following sections, we assess these results more closely.

### 457 Global similarity bounds bias coarse-scale entropy to reflect high-frequency power

458 Scale-dependent entropy effects in the face of global similarity bounds (as observed in the  
 459 'Original' implementation; Fig 7A) may intuitively suggest scale-specific variations in signal  
 460 irregularity in the absence of variance differences. However, global similarity bounds  
 461 increasingly diverge from the scale-wise signal variance towards coarser scales (Issue 1; Fig  
 462 8A). This introduces a liberal bias that systematically varies as a function of the removed  
 463 variance, thereby rendering coarse MSE scales sensitive to differences in higher frequency  
 464 power (i.e., Issue 1), as observed in the case of aging (Fig 8A & B).

465

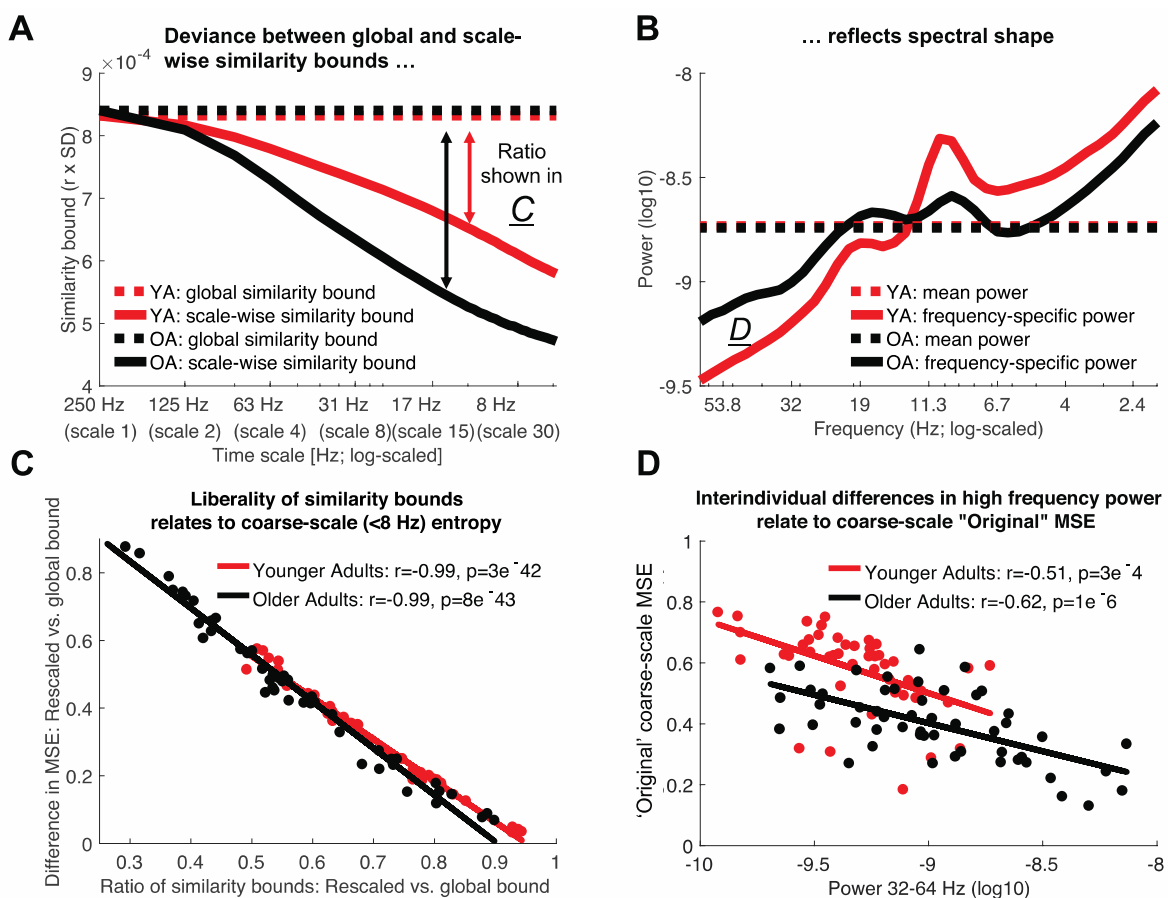

466

467 **Fig 8. Divergence of scale-specific signal variance from global similarity bounds accounts for age differences**  
 468 **in coarse-scale entropy.** (A, B) A global similarity bound does not reflect the spectral shape, thus leading to

469 disproportionately liberal criteria at coarse scales following the successive removal of high-frequency variance (see  
470 Fig 2D-F for the schematic example). Scale-dependent variance is more quickly reduced in older compared to  
471 younger adults (A) due to the removal of more prevalent high-frequency variance in the older group (B). This  
472 leads to a differential bias across age groups, as reflected in the differentially mismatched distance between global  
473 and scale-dependent similarity bounds at coarser scales. (C) Removing this bias by adjusting the similarity bounds  
474 to the scale-dependent signal is associated with increases in coarse-scale entropy. This shift is more pronounced  
475 in older adults following the removal of a more prevalent bias. (D) With global similarity bounds, coarse-scale  
476 entropy strongly reflects high frequency power due to the proportionally more liberal similarity threshold  
477 associated. Low frequency power < 8 Hz was not consistently related to coarse-scale entropy (log10-power as in  
478 D; YA:  $r = .12$ ;  $p = .419$ ; OA:  $r = .36$ ,  $p = .009$ ). Data in A and B are global averages, data in C and D are averages  
479 from frontal Original effect cluster (see Fig 4B) at entropy time scales below 8 Hz.

480 To assess whether global bounds introduced an association between high frequency  
481 power and coarse scale entropy in the case of aging, we probed changes in *similarity bounds*  
482 and MSE between the use of global and scale-varying bounds. As expected, we observed a  
483 strong anti-correlation between inter-individual changes in *similarity bounds* and MSE (Fig  
484 8C). That is, the more similarity bounds were re-adjusted to match the scale-wise variance, the  
485 more entropy estimates increased. Crucially, this difference was more pronounced for older  
486 adults (paired t-test;  $r: p = 5e-6$ ; MSE:  $p = 3e-4$ ). Due to their increased high frequency power,  
487 coarse-graining decreased older adults' scale-wise variance more so than younger adults'  
488 variance. Thus, global similarity bounds presented a more liberal threshold at coarser scales for  
489 older adults than for younger adults, in turn producing lower MSE estimates. In line with this  
490 assumed link between high frequency power and coarse scale entropy as a function of global  
491 bounds, individual high frequency power at frontal channels was anticorrelated with coarse-  
492 scale entropy estimates when a global similarity bound was applied (Fig 8D), but was  
493 dramatically weaker when the similarity bound was recomputed for each scale (YA:  $r = -0.15$ ;  
494  $p = .302$ ; OA:  $r = .20$ ,  $p = .146$ ). This is in line with our observation that coarse-scale age  
495 differences (Fig 7A) were not found when scale-wise bounds were used (Fig 7B).

496 Taken together, these results indicate that increased high frequency power with age can  
497 account for entropy decreases at coarse time scales, whereas the pattern irregularity of slow  
498 dynamics *per se* was not modulated by age.

#### 499 **Low-frequency contributions render fine-scale entropy a proxy measure of PSD slope**

500 A common observation in the MSE literature is that MSE is highly sensitive to task and  
501 behavioral differences at fine time scales, which are assumed to reflect fast dynamics. This is  
502 surprising given that high-frequency activity remains challenging to measure [56]. Moreover,  
503 previous studies suggest that fine-scale entropy reflects power spectral density (PSD) slopes  
504 [e.g., 14, 40]. Given that 'Original' MSE implementations contain both high- and low-  
505 frequency components due to the assessment of broadband signals, we probed whether fine-  
506 scale associations with PSD slopes depend on the presence of slow fluctuations and whether  
507 age-related slope variations can account for fine-scale entropy age differences (Hypothesis B).

508 As expected, individual fine-scale entropy was strongly and positively related to PSD slopes  
509 (Fig 9A) in both younger and older adults. Notably, after high-pass filtering the signal, the  
510 positive relation of fine-scale entropy to PSD slopes disappeared in both age groups (Fig 9B,  
511 dotted lines), and turned negative in older adults (see S6 Figure), while age differences in fine-



512 scale entropy disappeared (Fig 7D). Relations between entropy and PSD slopes – and age  
 513 differences – re-emerged once low-frequency content was included in the entropy estimation  
 514 (Fig 9C, dashed lines), indicating that the presence of slow fluctuations was necessary for PSD  
 515 slope relations. To assess whether varying PSD slopes accounted for fine-scale age differences  
 516 in ‘Original’ MSE, we computed partial correlations between the measures. No significant  
 517 prediction of age group status by fine-scale entropy was observed when controlling for the high  
 518 collinearity with PSD slopes ( $r = -.04, p = .69$ ), whereas PSD slopes significantly predicted age  
 519 group status when controlling for fine-scale entropy ( $r = .37, p = 2e-4$ ).

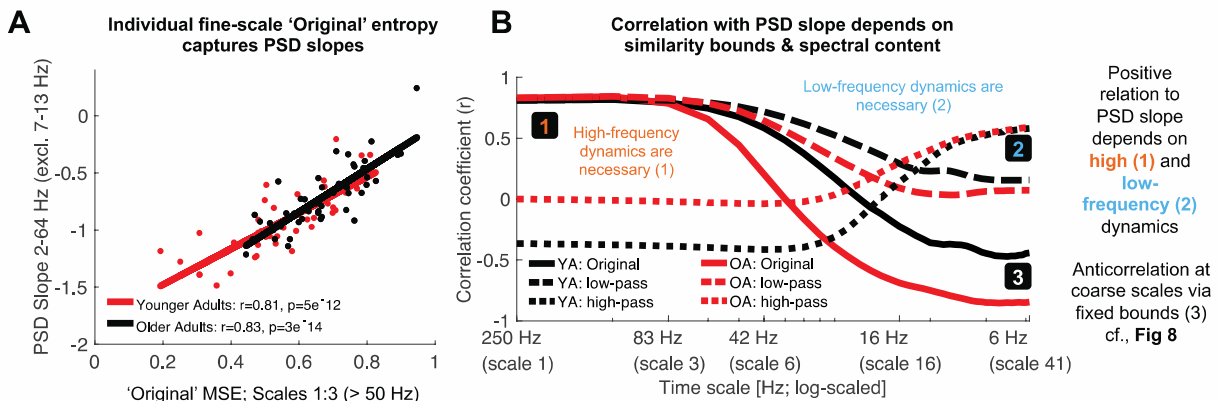

520 **Fig 9. The presence of low- and high-frequency content renders fine entropy slopes sensitive to PSD slopes.**  
 521 A) Sample entropy at fine time scales represents the slope of power spectral density across age groups. The 7-13  
 522 Hz range was excluded prior to the PSD slope fit to exclude the rhythmic alpha peak (see Fig 8B). (B) The presence  
 523 of both slow and fast dynamics is required for positive associations with PSD slopes to emerge. The direction and  
 524 magnitude of correlations of scale-wise entropy with PSD slopes depends on the choice of global vs. rescaled  
 525 similarity bounds, as well as the choice of filtering. Original entropy inverts from a positive correlation with PSD  
 526 slope at fine scales to a negative association at coarse scales. Rescaling of the similarity bound abolishes the  
 527 negative correlation of coarse-scale entropy with PSD slopes. S6 Figure presents scatter plots of these  
 528 relationships. The x-axis indicates the upper frequency bounds for the low-pass version.

530  
 531 Finally, spectral slopes were anticorrelated with coarse-scale entropy when global similarity  
 532 bounds were used (Fig 9C, solid lines), but not when criteria were scale-wise re-estimated (Fig  
 533 9C, dashed and dotted lines). This again suggests a presence of the scale-wise bias noted in  
 534 Issue 1 (i.e., scale-wise bound divergence); subjects with shallower slopes (more high  
 535 frequency power) had increasingly liberally-biased thresholds at coarser scales, resulting in  
 536 overly low entropy estimates.

537 In sum, age differences in fine-scale entropy were conditional on the presence of both low-  
 538 and high-frequency dynamics and reflected differences in PSD slopes; while the pattern  
 539 irregularity of fast dynamics *per se* was not modulated by age.

#### 540 **Narrowband MSE indicates age differences in signal irregularity in alpha and beta band**

541 The previous analyses highlighted how the spectral content of the signal can give rise to  
 542 MSE time scale mismatches. However, our simulations also suggest a far more accurate  
 543 mapping between entropy and power when scale-wise bandpass filters are used (Fig 4A).  
 544 Concurrently, application of the band-pass implementation indicates a partial decoupling  
 545 between entropy and variance (as reflected in the *similarity bound*) age differences (Fig 7E).  
 546 Specifically, older adults exhibited higher parieto-occipital entropy at alpha time scales (~8-12

547 Hz) and lower central entropy at beta time scales (~12-20 Hz) than in younger adults (Fig 7; Fig  
 548 10AB). Whereas alpha-band entropy was moderately and inversely correlated with alpha power  
 549 (Fig 10C) and the age difference was inversely reflected in the similarity bound in a  
 550 topographically similar fashion (Fig 10E), the same was not observed for entropy in the beta  
 551 range for both age groups (Fig 10DF). Promisingly, this indicates evidence for what many who  
 552 employ MSE measures in cognitive neuroscience presume – that power and entropy *can* be  
 553 decoupled, providing complementary signatures of neural dynamics.  
 554

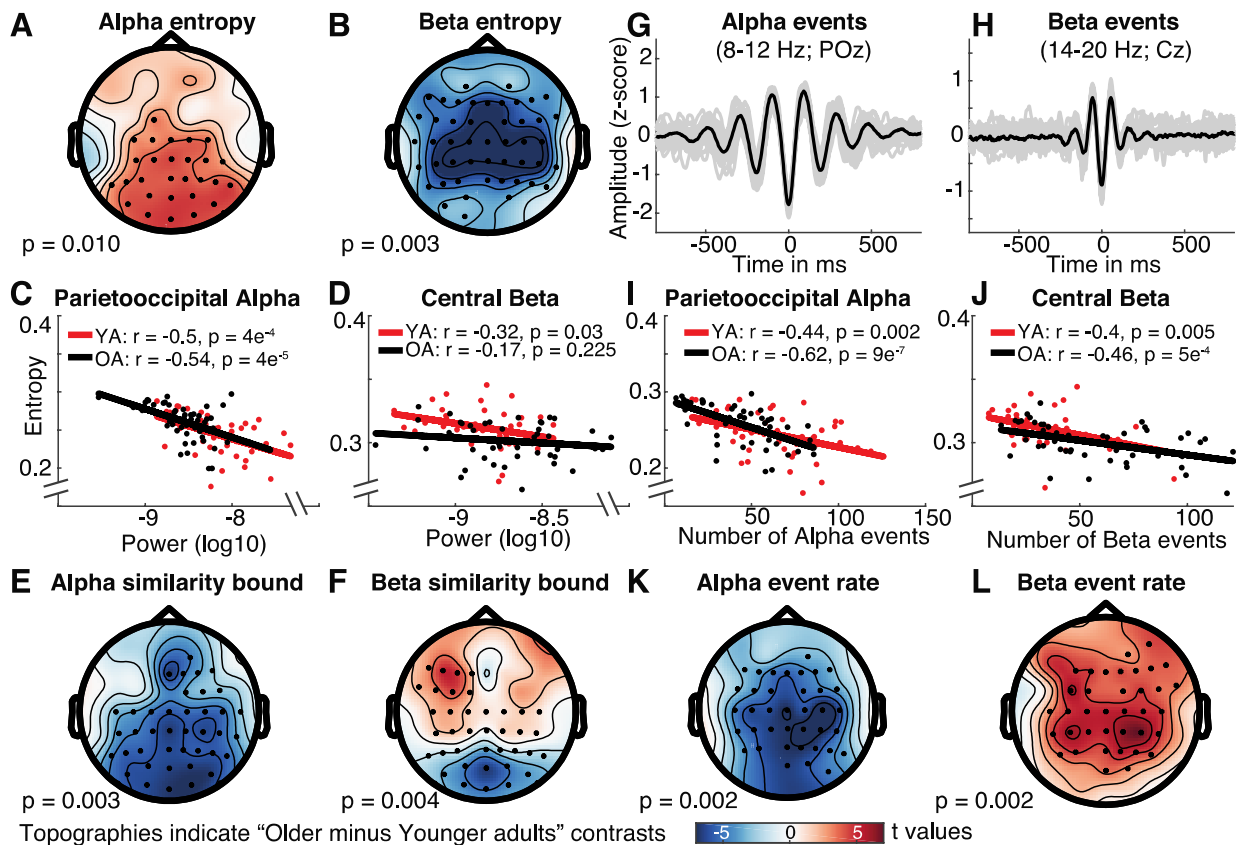

555  
 556 **Fig 10. Narrowband MSE reflects age differences in alpha- and beta-specific event (ir)regularity.** (A, B)  
 557 Narrowband MSE indicates age differences in the pattern complexity at alpha (A) and beta (B)  
 558 frequencies. (C, D) Alpha, but not beta power consistently correlates negatively with individual narrowband entropy within clusters  
 559 of age differences. (E, F) Similarly, alpha but not beta similarity bounds show an inverted age effect with similar  
 560 topography. (G, H) Single-trial rhythm detection highlights a more transient appearance of beta compared with  
 561 alpha events. Data are collapsed across age groups. (I, J) The rate of stereotypical single-trial alpha and beta events  
 562 is anticorrelated with individual narrowband entropy. (K, L) The rate of spectral events exhibits age differences  
 563 that mirror those observed for entropy. Note that the same color range, plotted in the lower row, was plotted for  
 564 all topographies.

565 This divergence of entropy and power in the beta band is particularly interesting as beta  
 566 events have been observed to exhibit a more transient waveform shape [57, 58], while  
 567 occupying a lower total duration during rest than alpha rhythms [42]. Indeed, it should be the  
 568 rate of stereotypic spectral events that reduces pattern irregularity rather than the overall power  
 569 within a frequency band. To better test this assumption in our data, we applied single-trial  
 570 rhythm detection to extract the individual rate of alpha (8-12 Hz) and beta (14-20 Hz) events.  
 571 As predicted, alpha events had a more sustained appearance compared with beta events as  
 572 shown in Fig 10G & H (events were time-locked to the trough of individual events; see

573 methods). Importantly, both alpha and beta event rate were inversely and moderately correlated  
574 with entropy estimates (Fig 10IJ) at matching time scales in the band-pass version. Correlations  
575 were also numerically higher than between power and entropy (Fig 10C and D), suggesting that  
576 entropy captured the non-stationary character of the rhythmic episodes that are not captured by  
577 sustained power estimates. The relationships remained stable after controlling for individual  
578 event rate and entropy in the age effect cluster of the other frequency band (partial correlations:  
579 alpha for younger adults:  $r = -.52$ ,  $p = 2e-4$ ; alpha for older adults:  $r = -.71$ ,  $p = 8e-9$ ; beta for  
580 younger adults  $r = -.49$ ,  $p = 6e-4$ ; beta for older adults:  $r = -.56$ ,  $p = 2e-5$ ), indicating separable  
581 associations between event rate and entropy between the two frequency bands. This is  
582 important, as our simulations suggest increased entropy estimates around narrow-band filtered  
583 rhythmicity (see Fig 4A). Furthermore, a permutation test indicated age differences in beta rate  
584 that were opposite in sign to the entropy age difference (see Fig 10L). In particular, older adults  
585 had a higher number of central beta events during the resting state compared with younger  
586 adults, thus rendering their beta-band dynamics more stereotypic. In sum, these results suggest  
587 that narrowband MSE estimates approximate the irregularity of non-stationary spectral events  
588 at matching time scales.

### 589 **Rhythmic alpha events transiently reduce broadband signal irregularity**

590 Finally, the neurobiological relation between narrowband rhythms and broadband signal  
591 characteristics (spectral slopes in particular; Fig 9) is a substantive question of considerable  
592 interest [59-61]. Rhythmic alpha events have been theorized to phasically modulate cortical  
593 excitability, with higher amplitudes of alpha events thought to reflect an overall reduction in  
594 population activity due to reduced excitability [55]. Such activation levels in turn have been  
595 related to scale-free broadband characteristics in human electrophysiological data [38, 51-54],  
596 which strongly contribute to fine-scale entropy estimates (Fig 9; Supplementary Fig 7). It is  
597 thus conceivable that alpha rhythms transiently reduce broadband irregularity. In line with this  
598 notion, negative associations between alpha power and fine-scale entropy have been observed  
599 [40, 62]. However, sample entropy's joint sensitivity to broad- and narrowband dynamics  
600 ("Issue 2") (see Fig 4) makes it ambiguous whether such associations truly reflect shifts in  
601 broadband features. We confirm this ambiguity in simulations (Fig 11A; sample entropy  
602 calculated for 250 ms signals consisting of varying slope coefficients in the presence or absence  
603 of alpha rhythms), where we observe that increased rhythmic regularity during alpha events  
604 concurrently decreases sample entropy, even when no change has occurred in the aperiodic  
605 signal component (Fig 11A: right vs. left). Controlling the spectral signal content via band-stop  
606 filters (here: 8-15 Hz) removes such circular entropy decreases due to increased narrowband  
607 regularity in the alpha band (Fig 11A, right), while accurately indicating entropy changes due  
608 to changes in spectral slopes (Fig 11A, left).

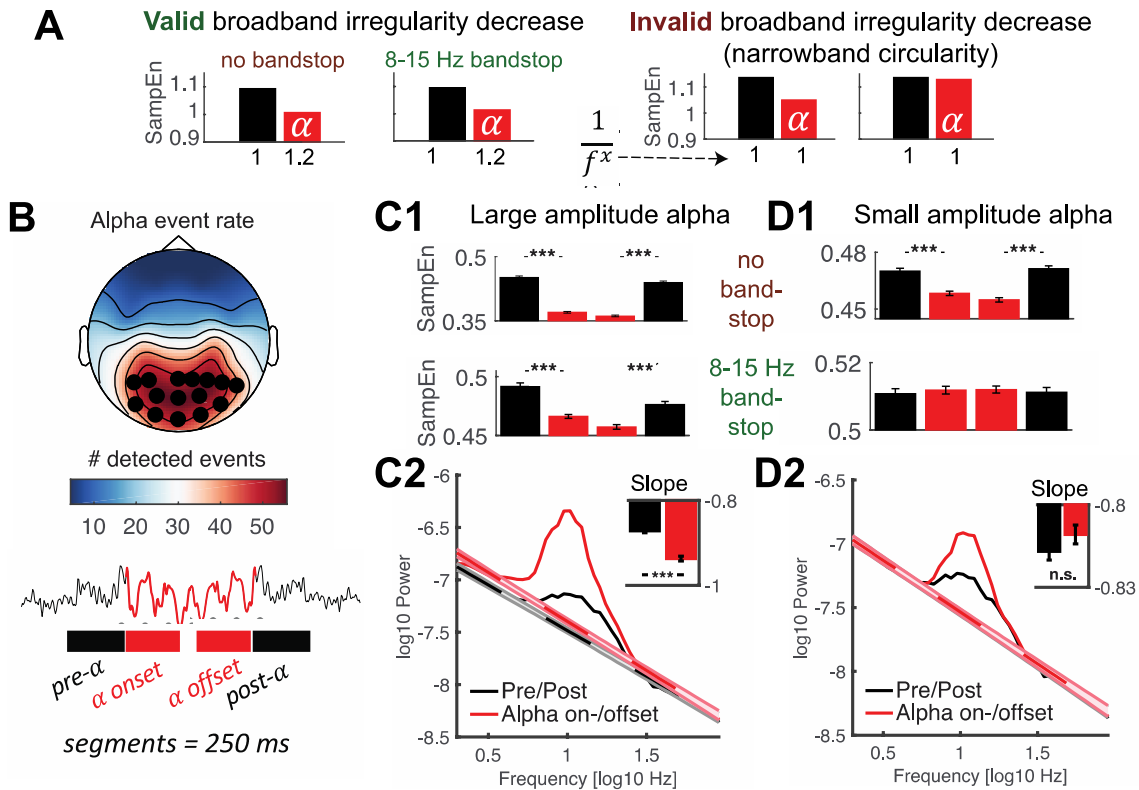

609  
 610 **Figure 11. Nonstationary alpha events transiently reduce broadband irregularity.** (A) Testing for transient  
 611 broadband changes during alpha events requires control for narrowband circularity. We simulated 250 ms signals  
 612 consisting of varying slope coefficients (plotted on the x-axis) in the presence or absence of alpha rhythms. Bars  
 613 indicate first-scale entropy estimates (i.e., sample entropy; SampEn) for these signals, as well as bandstop-filtered  
 614 versions. Left: Valid slope shallowing in the presence of alpha events was indicated both when alpha was included  
 615 in estimates, as well as when band-stop filters removed the influence of alpha regularity. Right: Crucially, when  
 616 no bandstop filters were applied, sample entropy decreased also in the absence of slope variations due to the added  
 617 alpha regularity. This effectively represents narrowband circularity in the analysis. In contrast, bandstop filtering  
 618 removed the influence of alpha regularity and permitted estimation of valid reductions in broadband irregularity.  
 619 (B, C, D) Empirical analysis of transient entropy decreases during alpha events. (B) Alpha events were selected  
 620 across channels with high amounts of detected events (black dots). Lower: Broadband entropy was calculated for  
 621 250 ms segments preceding and following the on- and offset of alpha events. (C1) During eyes open rest,  
 622 nonstationary alpha events of high strength transiently reduce broadband irregularity, also after accounting for  
 623 alpha circularity. Bars indicate the intervals schematically plotted in the bottom panel of B. (C2) Slope fits indicate  
 624 a shallowing of slopes during alpha events. The inset bar plot indicates mean slopes estimates with within-subject  
 625 standard errors. (D1) In contrast, irregularity decreases were indicated for low-amplitude alpha events only when  
 626 circularity was not accounted for, but not after alpha was removed. This indicates that bandstop filtering  
 627 successfully avoids circularity in empirical use cases. (D2) No significant slope changes were observed during  
 628 low-amplitude alpha events. Note that black dotted line is covered here. Error bars reflect within-subject standard  
 629 errors. \*\*\* =  $p < .001$

630  
 631 We used fine-scale sample entropy's sensitivity to aperiodic slopes determined above  
 632 (Fig 9; Supplementary Fig 7) to probe the relationship between broadband irregularity and  
 633 rhythmic alpha events with high temporal precision in empirical data. To test transient  
 634 modulations of irregularity during alpha rhythms, we leveraged the temporal on- and offsets of  
 635 individual alpha segments (8-15 Hz; > 3 cycles) during eyes-open rest as uniquely identified  
 636 by rhythm detection (see Fig 11B; see S8 Figure for exemplary traces). We created 250 ms  
 637 segments surrounding the on- and offsets of alpha activity, followed by the calculation of  
 638 sample entropy. To investigate potential differences as a function of magnitude, we median-

639 split high- and low-amplitude alpha events. For both splits, we observed that sample entropy  
640 decreased upon alpha onset, whereas it recovered to high levels following alpha offset (Fig  
641 11C1, D1; top). However, due to the aforementioned circularity, the observation of transient  
642 entropy decreases during alpha periods offers little unambiguous insight beyond the successful  
643 identification of rhythmic event on- and offsets by the eBOSC algorithm. Importantly, transient  
644 entropy decreases during high-amplitude alpha events were also observed after removal of the  
645 alpha band (Fig 11C1; bottom), indicating that narrowband amplitude increases in the alpha-  
646 band were not sufficient to explain the observed entropy differences. This provides evidence  
647 that spontaneous, large-amplitude alpha rhythms during eyes open rest transiently decrease  
648 broadband signal irregularity, supporting their suggested role in the modulation of cortical  
649 excitability. We did not observe an interaction between alpha status and age for any of the  
650 contrasts (all  $p > .05$ ), suggesting that decreased irregularity during transient alpha events is a  
651 preserved characteristic of cortical alpha rhythms across the adult lifespan. To further  
652 investigate a broadband effect, we calculated spectral slopes (using an auto-sandwiching  
653 approach, see methods). This analysis revealed a transient steepening of slopes during alpha  
654 events, in line with a broadband shift towards decreased excitability (Fig 11C2). In contrast to  
655 high-amplitude events, entropy decreases were not indicated for low-amplitude events after  
656 accounting for circularity bias (Fig 11D1, bottom). Similarly, no shift in aperiodic slopes was  
657 observed (Fig 11D2). This suggests that the originally indicated entropy decreases during low-  
658 amplitude events do not represent broadband shifts. This analysis highlights sample entropy's  
659 potential to indicate fluctuations in signal irregularity with high temporal precision. Notably,  
660 the analysis reinforces the need for a targeted modulation of spectral content to avoid circular  
661 inferences, and reduce the ambiguity of results. Our findings suggest an alternative use case for  
662 dedicated bandpass filters that retains high sensitivity to broadband effects of interest.  
663 Specifically, the mechanistically informed use of band-stop filters here affords analyses into  
664 the modulators of signal irregularity and thereby can reveal non-trivial neurocomputational/  
665 biological insights.

## 666 **Discussion**

667 MSE aims to characterize the temporal irregularity of (neural) time series at multiple  
668 temporal scales. In the present study, we have highlighted two primary issues that may render  
669 the interpretation of time scales unintuitive in traditional applications: (Issue 1) biases from  
670 global similarity bounds, and; (Issue 2) the characterization of broadband, low-frequency  
671 dominated signals (see Fig 12A for a schematic summary). In the following, we discuss these  
672 effects and how they can impact traditional inferences regarding signal irregularity, in particular  
673 with regard to empirical age differences. Then, we discuss age effects in narrowband signal  
674 irregularity at interpretable temporal scales. Finally, we recommend procedures to improve  
675 scale-specific MSE inferences.  
676

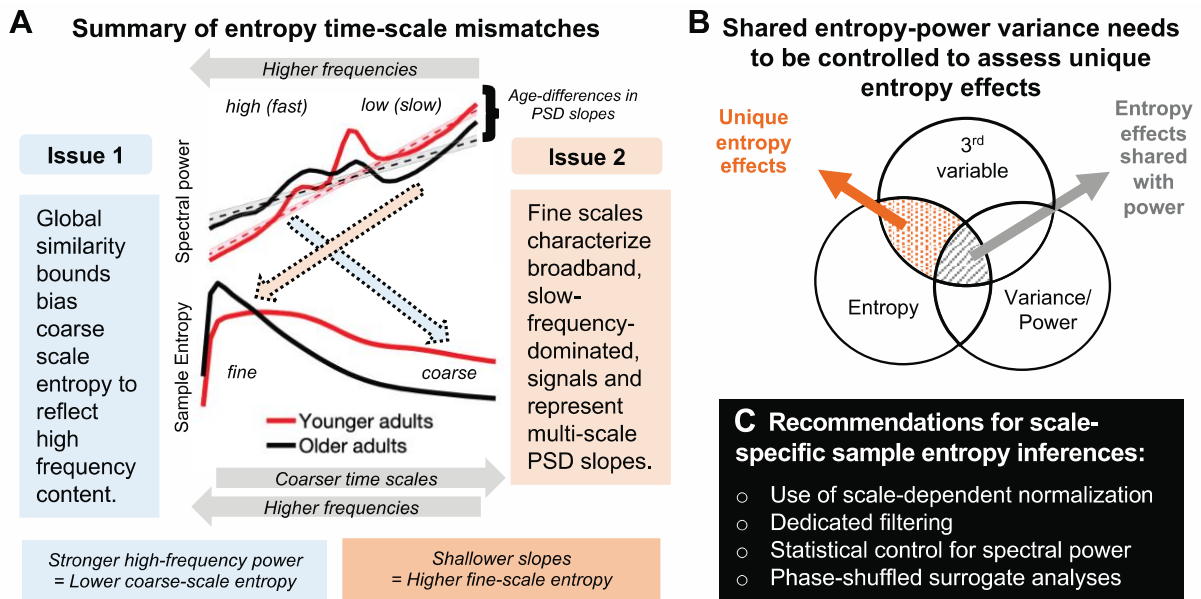

677  
678  
679  
680  
681  
682  
683  
684  
685  
686  
687

**Fig 12. Summary of the identified time-scale mismatches and recommendations for future studies.** (A) We highlight two scale-dependent mismatches that run counter to the intuition that entropy at fine scales primarily refers to fast dynamics, and vice-versa: (1) Coarse-scale entropy is biased towards reflecting high-frequency content when signals of decreasing variance are compared to a global, and increasingly inadequate, similarity bound. (2) Fine-scale entropy characterizes scale-free  $1/f$  slopes when broadband signals include slow frequency content. Dashed colored arrows indicate the mismatched relations observed in the current study. (B) Beyond time-scale mismatches, brain signal entropy and variance/power can often be collinear, in part due to their shared description of linear signal characteristics, such as rhythmicity. To identify complementary and unique relations of pattern complexity compared to more established measures of variance, explicit statistical control is required for the latter. (C) We propose multiple strategies to safeguard future applications against the highlighted issues.

688 **Issue 1: Global similarity bounds bias coarse-scale entropy estimates**

689 The ability to estimate entropy at coarser time scales provides the main motivation for a  
690 multi-scale implementation. Towards coarser scales, entropy is generally thought to represent  
691 the irregularity of increasingly slow dynamics. However, MSE's traditionally global similarity  
692 bounds systematically bias coarse scale entropy estimates. Given that scale-wise variance  
693 decreases across scales, the liberality of global similarity bounds increases, causing entropy to  
694 decrease despite no ostensible shift in pattern irregularity. This bias is independent of the values  
695 of the global similarity bound – which did not differ across groups here – but rather depends on  
696 the *removed* variance at the time scale of interest. This issue has led to puzzling results in past  
697 work. For example, several papers using 'original' MSE have shown that in white noise signals  
698 (which by definition should be equally irregular at all time scales due to its randomness),  
699 entropy unintuitively decreases towards coarser scales, whereas pink noise signals undergo less  
700 entropy reduction across initial scales due to the removal of less high-frequency content [29]  
701 (S7 Figure). Strikingly, such puzzling effects have been used to *validate* the most common  
702 implementation of MSE [e.g., 27, 32] rather than to indicate the presence of a systematic bias  
703 in estimation. This appears motivated by the assumption that “changes of the variance due to  
704 the coarse-graining procedure are related to the temporal structure of the original time series,  
705 and should be accounted for by the entropy measure” [12]. We rather consider the similarity  
706 bound divergence a clear bias that invalidates the intuitive interpretation of time scales in MSE

707 applications, and highlight that more intuitive broad-scale offsets are indicated when bound  
708 biases are removed (see Supplementary File 2 for elaboration on this issue).

709 Importantly, we highlight that this bias affects practical inferences. In the current resting-  
710 state EEG data, an age-related increase in high frequency power manifested unintuitively as a  
711 decrease in coarse-scale entropy via systematic group differences in the divergence of similarity  
712 bounds. Note that we presume that this age difference arises from a relative bias. As such,  
713 variations in high-frequency power suffice, even at low levels in 1/f scenarios, to systematically  
714 impact coarse-scale estimates and to specifically explain variance in a third variable of interest  
715 (e.g., age; see Fig 12B). Given that global similarity bounds remain prevalent in applications  
716 (see S1 File), we hope that our practical example motivates the adoption of scale-varying  
717 parameters. Overall, we perceive little justification for the use of scale-invariant parameters in  
718 MSE estimation in future work. Indeed, as most previous work included biased, global bounds,  
719 reported coarse-scale effects may dominantly reflect false positives, while the sensitivity to true  
720 coarse-scale effects may have suffered, hence jointly increasing false negatives. Hence, results  
721 obtained with global bounds are ambiguous and hard to interpret. A critical task for future work  
722 (potentially including the re-analysis of existing data) will thus be to establish specific coarse-  
723 scale effects that provide empirical evidence for the practical utility of a multi-scale entropy  
724 computation. Recent advances for the robust estimation of coarse-scale entropy from sparse  
725 neuroimaging data [34, 63, 64] may be required to better estimate coarse-scale effects in *in vivo*  
726 data.

## 727 **Issue 2: Fine-scale entropy relates to PSD slopes in the presence of slow frequency** 728 **content**

729 In parallel to the assumption of dominantly slow signal contributions to coarser scales, fine-  
730 scale entropy is often interpreted as a signature of “fast” temporal irregularity. However, it is  
731 typically estimated from broadband signals. As such, slow trends [35], neural rhythms at  
732 characteristic time scales [65] (Fig 4) and scale-free ‘background’ or ‘noise’ activity with a  $\frac{1}{f^x}$   
733 power-law form [38, 50, 53] (Fig 9) jointly contribute to fine-scale entropy estimates. By  
734 linking fine-scale entropy to broadband PSD slopes, we replicated previous observations of  
735 increasing sample entropy with shallower slopes [14, 17, 29, 40, 46, 66] and shorter temporal  
736 autocorrelations [4, 27, 67]. However, we qualify this association by highlighting that the *joint*  
737 presence of slow and fast dynamics in the signal is necessary to produce such effects, hence  
738 verifying a broadband origin. At a mechanistic level, differences in spectral slopes and fine-  
739 scale entropy may jointly index variations in cortical excitability. Cortical neurons constantly  
740 receive a barrage of synaptic inputs. Variations in the excitatory and inhibitory summary  
741 statistics of these inputs robustly alter the conductance state of membrane potentials [for a  
742 review see 68], thereby producing variations in the irregularity of spike output and the  
743 appearance of global EEG signals [for a review see 69]. Whereas excitability is reduced during  
744 synchronized states characterized by strong low-frequency fluctuations, “desynchronized”  
745 cortical states feature enhanced sensitivity to external stimuli [70-72]. From a functional  
746 perspective, cortical information capacity, approximated via the entropy of cortical activity,  
747 may non-linearly vary alongside such excitation/inhibition (E/I) ratio, with highest information  
748 capacity afforded at intermediate levels of systemic excitability [10]. From a technical

749 perspective, spectral (PSD) slopes have been proposed as a functional index of such an E/I ratio  
750 [49, 54, 73-75]. However, frequency-dependent filtering of current flow in the extracellular  
751 medium [76] or at the dendrite [77] may also contribute to the observed inter-individual  
752 differences in spectral slopes.

753 More generally, the association between broadband signal entropy and spectral slopes  
754 coheres with the notion that shallower slopes have a more ‘noisy’ or irregular appearance in the  
755 time domain. Thus, spectral slopes and temporal predictability are – at least in part – different  
756 perspectives on the same signal characteristic. Practically however, the correspondence  
757 between fine-scale entropy and 1/f slopes should nonetheless be tested, given that these scales  
758 are also sensitive to other signals characteristics, such as narrowband rhythmicity (Fig 4). Such  
759 necessity for narrowband control is highlighted by our analysis of transient fine-scale entropy  
760 changes during non-stationary alpha events (Fig 11). Only the removal of narrowband rhythmic  
761 regularity afforded non-circular insights. Specifically, we observed that broadband entropy  
762 transiently reduces following the onset and prior to the offset of parieto-occipital alpha rhythms,  
763 alongside a steepening of spectral slopes. This result is in line with alpha rhythms reflecting  
764 synchronized states with reduced cortical excitability [55, 59, 60, 78-81], but extends prior  
765 applications by characterizing non-stationary events at the single-trial level with high temporal  
766 precision, rather than temporal averages. Notably, our results contradict a prior observation that  
767 increased spontaneous alpha amplitudes at rest relate to a shallowing of low-frequency slopes,  
768 both in time and space [61]. Whether differences in frequency range, temporal specificity, or  
769 the stability of slope estimates contribute to this difference is an interesting question for future  
770 research that sample entropy may help to resolve. Notably, the fine-scale sensitivity of this  
771 effect highlights that single-scale broadband (sample) entropy– in the absence of multiscale  
772 implementations – is *per se* sensitive to broadband effects of interest, benefitting applications  
773 with limited available data and time [e.g., closed-loop setups: 62].

#### 774 **Spectral power and entropy: What’s irregularity got to do with it?**

775 For entropy to be a practical and non-redundant measure in cognitive neuroscience, both its  
776 convergent and discriminant validity to known signal characteristics should be established.  
777 Multiple features can influence the temporal irregularity of neural time series. These include  
778 traditional ‘linear’ PSD features, (e.g., temporal autocorrelation, rhythmicity, etc.) as well as  
779 ‘non-linear’ features (e.g., phase resets, cross-frequency coupling, etc.). It is therefore worth  
780 noting that associations between spectral power characteristics and entropy estimates are partly  
781 anticipated (Fig 12B). For example, as noted before, entropy should reduce with increased  
782 rhythmic irregularity, and increase with shallowing of PSD slopes (and hence, shortening of  
783 temporal autocorrelations). However, the use of MSE is often motivated by its partial sensitivity  
784 to non-linear properties of brain dynamics [27, 46] that cannot be captured by traditional PSD  
785 analyses [e.g., 82, 83, 84]. In extreme cases, the absence of linear contributions may be  
786 erroneously inferred from the use of variance-based similarity bounds. Contrary to such  
787 orthogonality assumptions, our analyses highlight that differences in spectral variance (as  
788 captured by the similarity bound, which is typically neglected as a measure of interest when  
789 estimating MSE) *can* account for a large proportion of reported MSE effects [see also appendix  
790 in 27]. As such, non-linear characteristics *per se* may often do little to drive MSE estimates (see



791 also results from a surrogate analysis in Supplementary File 3, S9 Figure). This is in line with  
792 dominant linear power contributions to non-linear measures [85]. Conversely, the specificity to  
793 valid and unique non-linear effects increases after methodologically accounting for linear  
794 contributions.

## 795 **Relevance of identified time scale mismatches to previous work**

796 Although the highlighted issues broadly apply to applications in which MSE is a measure  
797 of interest (e.g., assessment of clinical outcomes [e.g., 22]; prediction of cognitive performance  
798 [e.g., 46]), our results are especially relevant for MSE differences across the lifespan. Previous  
799 applications indicated that older adults exhibit lower coarse-scale entropy and higher fine-scale  
800 entropy compared with younger adults [16, 18, 27, 86]. While we conceptually replicate these  
801 results with the standard MSE implementation, our analyses question the validity of previous  
802 interpretations. In particular, our results suggest that age-related increases in coarse-scale  
803 entropy do not reflect valid differences in the irregularity of slow dynamics, but rather reflect  
804 differential high frequency power biases [see also 19]. Moreover, our analyses ascribe age  
805 differences in fine-scale irregularity to a flattening of PSD slopes, as observed from child- to  
806 adulthood [46] and towards old age [16, 18, 40, 49]. Such shallowing of scale-free slopes  
807 suggests relative shifts from distributed to local processing, and coheres with the notion of  
808 increased “neural noise” due to increases in the local excitation/inhibition ratio [54].

809 Across development, altered time scales of neural computations (as indicated by broadband  
810 changes in autocorrelations) [87] may reflect changes in intra- and inter-cortical connectivity  
811 [88], arising from reductions in grey matter density [89, 90], the integrity of associative white  
812 matter tracts [91], and changes in local receptor distributions and neuromodulation [92-96].  
813 Dynamic interactions between such morphological changes may jointly shape control over local  
814 excitability and ‘neural noise’ across the lifespan [97]. Two alternative functional consequences  
815 of developmental noise increases have been proposed. On the one hand, intermediate levels of  
816 noise may provide beneficial stochastic resonance effects [9, 98-100], in line with relations  
817 between higher entropy and behavioral benefits in child- and adulthood [46], as well as in older  
818 adults [86]. In contrast, overwhelming amounts of local noise can produce adverse  
819 consequences [49, 101], supported by the observation that shallower slopes with advanced adult  
820 age relate to impaired working memory performance [49]. While further work including  
821 longitudinal assessments and behavioral probes will be necessary to disentangle the functional  
822 relevance of developmental changes, we argue that a principled separation of narrow- and  
823 broadband changes [102] will help to guide the search for neurobiological mechanisms driving  
824 entropy effects.

825 Taken together, our results suggest that entropy age differences dominantly arise from linear  
826 power differences, and appear at counterintuitive time scales. We confirmed the dominant  
827 contribution of age group differences in power characteristics using a surrogate analysis (see  
828 Supplementary File 3, S9 Figure). Our surrogate analysis replicates a previous surrogate  
829 analysis that attributed age group differences mainly to linear auto-correlative properties [see  
830 appendix in 27, see also 85]. As we exclusively focused on univariate entropy, it remains an  
831 interesting question for future work whether our results are applicable to age-related decreases  
832 in ‘distributed’ entropy that capture the mutual information between distinct sensors [16].

### 833 **Cross-sectional age differences in narrowband MSE**

834 Complementing traditional broadband applications, our use of narrowband MSE suggested  
835 age-related entropy increases in the posterior-occipital alpha band and decreases in central beta  
836 entropy that inversely tracked the regularity of alpha and beta events, respectively. Posterior-  
837 occipital decreases in alpha power and frequency with age are fundamental findings in many  
838 age-comparative studies [103]. While age-related increases in beta power are not observed as  
839 consistently [see e.g., 103 for a review], age-related increases in their prevalence have been  
840 observed during eyes open rest [104]. In addition, beta power increases over contralateral motor  
841 cortex during rest may reflect greater GABAergic inhibition in healthy aging [105]. While our  
842 results are not hemisphere-specific, they may similarly reflect increased inhibition in older  
843 adults, potentially reflected in an increased number of stereotypical beta events [58]. However,  
844 further work is required to establish the functional interpretation of narrowband age differences,  
845 as well as technical impacts of filter bandwidth, and individual center frequencies on  
846 narrowband results, especially given age differences in rhythmic peak frequencies [103].  
847 Nevertheless, these results highlight that scale-specific narrowband filtering can provide novel,  
848 frequency-specific, insights into event/signal irregularity.

849 Notably, a narrowband approach may warrant different use cases than broadband entropy.  
850 In particular, the sensitivity to multi-scale information, such as cross-frequency interactions and  
851 waveform shape, is a defining characteristic of (and motivation for using) entropy as opposed  
852 to spectral analysis. However, this sensitivity trades off with specificity when a narrowband  
853 approach is chosen, which by definition enforces a more rhythmic appearance than the raw  
854 signal may convey [106]. Nonetheless, frequency-specific phenomena such as variations in the  
855 amplitude or the presence of rhythmic events are complementary signatures of irregularity in  
856 their own right. For example, long-range temporal correlations (LRTCs) of narrowband  
857 amplitudes provide an alternative window on the irregularity of temporal dynamics [107-109].  
858 As such, targeted filter applications – either chosen *a priori* or as a follow-up to broadband  
859 entropy effects – may prove useful to delineate spectrally specific effects at directly  
860 interpretable neural time scales. Hence, we do not regard narrowband MSE as a replacement  
861 for the traditional low-pass implementation of MSE, but rather as a parallel tool for the  
862 exploration and probing of broadband effects. Moreover, sensitivity to broad-scale phenomena  
863 remains high when band-stop filters are used (e.g., Fig 11), highlighting the general feasibility  
864 of applying narrowband filters to derive broadband insights beyond the band-stop range.

### 865 **Recommendations for future applications**

866 The issues raised here suggest that additional steps need to be taken to achieve valid scale-  
867 wise estimates of MSE, and to support the perceived complementary nature of MSE relative to  
868 more typical measures (such as spectral power, etc.). We are optimistic that the following  
869 recommendations, which have already been partially proposed [33-35, 63, 110], improve the  
870 utility of MSE as a principled tool for the estimation of complex brain dynamics.

- 871
- 872 a) We see little motivation for the use of global similarity bounds as they introduce challenges  
873 rather than benefits. We therefore recommend the MSE field to abandon *global* similarity

874 bounds in favor of scale-specific bounds. We hope that our showcase of their detrimental  
875 consequences contributes to the wide-scale adoption of ‘refined’ approaches [e.g., 33, 34,  
876 110], which we consider the minimum requirement for novel neurocomputational insights.

877 b) We recommend spectral filters to validate the scale-specificity and/or broadband nature of  
878 effects. For example, if effects are observed at fine temporal scales with a low-pass filter,  
879 additional high-pass filters may inform about the spectral extent of the effect. For entropy  
880 estimates of slow dynamics, traditional low-pass filter settings already apply this principle  
881 by becoming increasingly specific to slow fluctuations (if scale-dependent normalization is  
882 used) – but crucially, specify to high-frequency content is never attained. This proposal  
883 represents a general extension of proposed solutions based on high-pass filtering to remove  
884 slow trends [35], or based on incorporating slow temporal correlations into parametric  
885 models for the MSE estimation [34, 63].

886 c) We regard statistical control as necessary to establish entropy effects that are not capturable  
887 by traditional linear indices (such as PSD characteristics). While some studies have shown  
888 joint effects of interest in MSE and (band-limited) spectral power [15, 16, 18, 19, 111-117],  
889 others identified unique MSE effects [22, 118-120]. However, the (mis)match between  
890 time-scales and frequencies may not always be readily apparent, at least in part due to the  
891 various issues raised here. As shown here, controls should include both narrowband  
892 (‘rhythmic’) power and the arrhythmic signal background. As the scale-wise *similarity*  
893 *bound* is used for normalization, it should at the very least be controlled for. The choice of  
894 features may further be aided by comparing effect topographies of spectral power and  
895 entropy, as done in the present study. An important point to note is the relevance of  
896 statistical controls for relations to third variables (see Fig 12B). While some studies  
897 highlight scale-dependent associations of entropy with power, a large amount of shared  
898 variance (e.g., of coarse-scale entropy with slow frequency power) does not guarantee that  
899 a smaller portion of residual variance (e.g., shared with normalization biases) systematically  
900 does or does not relate to other effects of interest. This is equally relevant for identifying  
901 unique non-linear contributions. For example, while we observed moderate associations  
902 between band-specific rhythm events and entropy here, this non-redundant association  
903 nevertheless leaves room for the two measures to diverge in relation to third variables. This  
904 is in line with prior work [27, 121] showing that despite a dominant influence of linear  
905 characteristics on entropy estimates, non-linear contributions can uniquely explain a  
906 (smaller) portion of entropy variance.

907 d) Finally, a principled way to dissociate non-linear signal characteristics from linear signal  
908 variance is to use phase-shuffled surrogate data [5, 122-125]. Phase randomization (see  
909 Supplementary File 3, S9 Figure) effectively alters original time series patterns while  
910 preserving linear PSD characteristics and “is unavoidable if conclusions are to be drawn  
911 about the existence of nonlinear dynamics in the underlying system” [5]. While such  
912 surrogate approaches have been utilized in select entropy applications [4, e.g., appendix of  
913 27] to highlight entropy’s non-linear sensitivity [e.g., 30, 32, 46], it has not become common  
914 practice in application. Given that MSE is sensitive to many linear characteristics, some of  
915 which are shown in the present work, we consider surrogate analyses as an optimal approach  
916 to verify the contribution of non-linear signal characteristics.

917

918 In combination, such controls may go a long way toward establishing unique, complementary,  
919 and valid contributions of MSE in future work.

## 920 **Conclusions**

921 Many inferences regarding multiscale entropy in cognitive/clinical neuroscience rely on the  
922 assumption that estimates uniquely relate to pattern irregularity at specific temporal scales. Here  
923 we show that both assumptions may be invalid depending on the consideration of signal  
924 normalization and spectral content. Using simulations and empirical examples, we showed how  
925 spectral power differences can introduce entropy effects that are inversely mapped in time scale  
926 (i.e., differences in the high frequency power may be reflected in coarse entropy and vice versa;  
927 see Fig 11A). As these results suggest fundamental challenges to traditional MSE analysis  
928 procedures and inferences, we highlight the need to test for unique entropy effects (Fig 11B)  
929 and recommend best practices and sanity checks (Fig 11C) to increase confidence in the  
930 complementary value of pattern irregularity for cognitive/clinical neuroscience. While the  
931 warranted claim has been made that “it would be unreasonable simply to reduce sample entropy  
932 to autocorrelation, spectral power, non-stationarity or any of their combinations” [4], this  
933 should not mean that we cannot test whether one or more of these contributors may sufficiently  
934 explain MSE effects of interest. We thus propose that MSE effects may be taken as a starting  
935 point to explore the linear and nonlinear features of brain signals [e.g., 126]. We believe that  
936 empirical identification of the unique predictive utility of MSE will advance the quest for  
937 reliable mechanistic indicators of flexible brain function across the lifespan, and in relation to  
938 cognition, health, and disease.

## 939 **Methods**

### 940 **Simulations of relations between rhythmic frequency, amplitude, and MSE**

941 To assess the influence of rhythmicity on entropy estimates, we simulated varying  
942 amplitudes (0 to 7 arbitrary units in steps of 0.5) of 10 Hz (alpha) rhythms on a fixed 1/f  
943 background. This range varies from the absence to the clear presence of rhythmicity (see S3  
944 Figure for an example). The background consisted of  $\frac{1}{f^x}$ -filtered Gaussian white noise (mean =  
945 0; std = 1) with  $x = 1$  that was generated using the function `f_alpha_gaussian` [127]. The  
946 background was additionally band-pass filtered between .5 and 70 Hz using 4<sup>th</sup> order  
947 Butterworth filters. Eight second segments (250 Hz sampling rate) were simulated for 100  
948 artificial, background-varying trials, and phase-locked 10 Hz sinusoids were superimposed. To  
949 analyze the reflection of rhythmic frequency on time scales and to replicate a previously  
950 observed linear frequency-to-timescale mapping between the spectral and entropy domains [4,  
951 22, 44], we repeated our simulations with sinusoids of different frequencies (5 Hz, 10 Hz, 20  
952 Hz, 40 Hz, 80 Hz), that covered the entire eight second-long segments. For a specified  
953 amplitude level, the magnitude of frequency-specific power increases (or narrowband signal-  
954 to-noise ratio) increased alongside simulated frequencies due to the decreasing frequency power  
955 of pink noise, while the ratio of rhythmic-to-global signal variance (or global signal-to-noise  
956 ratio (SNR)) remained constant across simulated frequencies. We used the following definition:

957  $SNR_{\text{global}} = \left( \frac{RMS_{\text{signal}}}{RMS_{\text{noise}}} \right)^2$ , where  $RMS_{\text{noise}}$  is the root mean square of the pink noise time series  
958 and  $RMS_{\text{signal}}$  characterizes the pink noise signal with added rhythmicity.

## 959 **Resting state data and preprocessing**

960 To investigate the influence of similarity bounds and filter ranges in empirical data, we used  
961 resting-state EEG data collected in the context of a larger assessment prior to task performance  
962 and immediately following electrode preparation. Following exclusion of three subjects due to  
963 recording errors, the final sample contained 47 younger (mean age = 25.8 years, SD = 4.6, range  
964 18 to 35 years; 25 women) and 52 older adults (mean age = 68.7 years, SD = 4.2, range 59 to  
965 78 years; 28 women) recruited from the participant database of the Max Planck Institute for  
966 Human Development, Berlin, Germany (MPIB). Participants were right-handed, as assessed  
967 with a modified version of the Edinburgh Handedness Inventory [128], and had normal or  
968 corrected-to-normal vision. Participants reported to be in good health with no known history of  
969 neurological or psychiatric incidences, and were paid for their participation (10 € per hour). All  
970 older adults had Mini Mental State Examination (MMSE) [129, 130] scores above 25. All  
971 participants gave written informed consent according to the institutional guidelines of the  
972 Deutsche Gesellschaft für Psychologie (DGPS) ethics board, which approved the study.

973 Participants were seated at a distance of 80 cm in front of a 60 Hz LCD monitor in an  
974 acoustically and electrically shielded chamber. Following electrode placement, participants  
975 were instructed to rest for 3 minutes with their eyes open and closed, respectively. During the  
976 eyes open interval, subjects were instructed to fixate on a centrally presented fixation cross. An  
977 auditory beep indicated to the subjects when to close their eyes. Only data from the eyes open  
978 resting state were analyzed here. EEG was continuously recorded from 64 active (Ag/AgCl)  
979 electrodes using BrainAmp amplifiers (Brain Products GmbH, Gilching, Germany). Sixty scalp  
980 electrodes were arranged within an elastic cap (EASYCAP GmbH, Herrsching, Germany)  
981 according to the 10% system [131], with the ground placed at AFz. To monitor eye movements,  
982 two electrodes were placed on the outer canthi (horizontal EOG) and one electrode below the  
983 left eye (vertical EOG). During recording, all electrodes were referenced to the right mastoid  
984 electrode, while the left mastoid electrode was recorded as an additional channel. Online,  
985 signals were digitized at a sampling rate of 1 kHz.

986 Preprocessing and analysis of EEG data were conducted with the FieldTrip toolbox [132]  
987 and using custom-written MATLAB (The MathWorks Inc., Natick, MA, USA) code. Offline,  
988 EEG data were filtered using a 4<sup>th</sup> order Butterworth filter with a pass-band of 0.2 to 125 Hz.  
989 Subsequently, data were downsampled to 500 Hz and all channels were re-referenced to  
990 mathematically averaged mastoids. Blink, movement and heart-beat artifacts were identified  
991 using Independent Component Analysis [ICA; 133] and removed from the signal. Artifact-  
992 contaminated channels (determined across epochs) were automatically detected using (a) the  
993 FASTER algorithm [134], and by (b) detecting outliers exceeding three standard deviations of  
994 the kurtosis of the distribution of power values in each epoch within low (0.2-2 Hz) or high (30-  
995 100 Hz) frequency bands, respectively. Rejected channels were interpolated using spherical  
996 splines [135]. Subsequently, noisy epochs were likewise excluded based on FASTER and on  
997 recursive outlier detection. Finally, recordings were segmented to participant cues to open their  
998 eyes, and were epoched into non-overlapping 3 second pseudo-trials. To enhance spatial

999 specificity, scalp current density estimates were derived via 4<sup>th</sup> order spherical splines [135]  
1000 using a standard 10-05 channel layout (conductivity: 0.33 S/m; regularization: 1<sup>-05</sup>; 14<sup>th</sup>  
1001 degree polynomials).

## 1002 **Calculation of (modified) multi-scale sample entropy (mMSE)**

1003 MSE characterizes signal irregularity at multiple time scales by estimating sample  
1004 entropy (SampEn) at each time scale of interest. A schematic of the estimation pipeline is shown  
1005 in S1 Figure. The mMSE code is provided at <https://github.com/LNDG/mMSE>. A tutorial for  
1006 computing mMSE has been published on the FieldTrip website  
1007 ([http://www.fieldtriptoolbox.org/example/entropy\\_analysis/](http://www.fieldtriptoolbox.org/example/entropy_analysis/)).

1008 **Sample entropy estimation procedure.** The estimation of SampEn involves counting how  
1009 often patterns of  $m$  successive data points reoccur in time ( $\mathbf{p}^m$ ) and assessing how many of  
1010 those patterns remain similar when the next sample  $m+1$  is added to the sequence ( $\mathbf{p}^{m+1}$ ). Given  
1011 that amplitude values are rarely exactly equal in physiological time series, a *similarity bound*  
1012 defines which individual data points are considered similar. This step discretizes the data and  
1013 allows to compare data patterns rather than exact data values. The similarity bound is defined  
1014 as a proportion  $r$  of the time series standard deviation ( $SD$ ; i.e., square root of signal variance)  
1015 to normalize the estimation of sample entropy for total signal variation. That is, for any data  
1016 point  $k$ , all data points within  $k \pm r \times SD$  are by definition equal to  $k$ , which forms the basis for  
1017 assessing sequence patterns. SampEn is finally given as the natural log of  $\mathbf{p}^m(r) / \mathbf{p}^{m+1}(r)$ .  
1018 Consequently, high SampEn values indicate low temporal regularity as many patterns of length  
1019  $m$  are not repeated at length  $m+1$ . In our applications,  $m$  was set to 2 and  $r$  was set to .5, in line  
1020 with prior recommendations [13] and EEG applications [27, 46, 136].

1021 **Multi-scale signal derivation procedure.** To extend sample entropy to multiple time scales,  
1022 MSE ‘coarse-grains’ the original time series for multiple scale factors  $\tau$  (here 1 to 42, where 1  
1023 refers to the original signal). The ‘Original’ MSE method [11, 12] averages time points within  
1024 non-overlapping time bins (i.e., ‘point averaging’). Such point averaging is equivalent to a low-  
1025 pass finite-impulse response (FIR) filter, which can introduce aliasing however [33, 137] and  
1026 constrains the specificity towards increasingly slow signals, while not allowing specificity to  
1027 fast dynamics or any particular frequency range of interest. To implement control over the  
1028 scale-wise filter direction and to reduce aliasing, we applied either low- [31, 33, 137], high-, or  
1029 band-pass filters at each scale factor. The low-pass cut-off was defined as  $LP = \frac{1}{scale} * nyquist$   
1030 and was implemented using a 6<sup>th</sup> order Butterworth filter. Similarly, the high-pass cut-off was  
1031 defined as  $HP = \frac{1}{scale+1} * nyquist$ , implemented via 6<sup>th</sup> order Butterworth filters. Note that  
1032 these cut-offs describe the upper and lower frequency bounds at each time scale, respectively.  
1033 Finally, band-pass filters were applied to obtain narrowband estimates by sequentially applying  
1034 Chebyshev Type I low- and high-pass filters (4<sup>th</sup> order with passband ripple of 1dB; chosen to  
1035 achieve a fast filter roll-off), thus ensuring that each scale captured frequency-specific  
1036 information. The passband was defined as  $BP = LP \pm 0.05 * LP$ . To avoid pronounced passband  
1037 ripple for broad passbands, 10<sup>th</sup> order Butterworth filters replaced the Chebyshev filters at  
1038 scales where the passband was larger than  $0.5 * Nyquist$ . At scale 1, only a high-pass 10<sup>th</sup> order

1039 Butterworth filter was applied as the sampling rate of the signal set the upper (Nyquist)  
1040 frequency bound. These settings were chosen to optimize the pass-through of signals within the  
1041 pass-band and the attenuation of signals outside the pass-band. Two-pass filtering using  
1042 MATLAB's `filtfilt` function was applied to achieve zero-phase delay. S4 Figure shows the  
1043 spectral attenuation properties [138] of the filters. To avoid edge artefacts, input signals were  
1044 symmetrically mean-padded with half the pseudo-trial duration (i.e., 1500 ms). After filtering,  
1045 we implemented a point-skipping procedure to down-sample scale-wise signals (see S1 Figure).  
1046 Since point-skipping allows for increasing starting point permutations  $k$  for increasing scale  
1047 factors  $\tau$ , we counted patterns separately for each starting point  $k$ , summed the counts of pattern  
1048 matches and non-matches across them, and computed sample entropy based on the summed  
1049 counts as described above:  $\text{MSE}(\mathbf{x}, \tau, \mathbf{m}, \mathbf{r}) = \ln\left(\frac{\sum_{k=1}^{\tau} p^m}{\sum_{k=1}^{\tau} p^{m+1}}\right)$ . This implementation is equivalent  
1050 to “refined composite MSE” [110] and can improve the stability of entropy results for short or  
1051 noisy signals [31, 110]. Note that no point skipping was performed in the ‘high-pass’  
1052 implementation to avoid low-pass filtering. As a result, the signals at increasing scale factors  
1053 remained at the original sampling rate. To alleviate computational cost, scale factors were  
1054 sampled in step sizes of 3 for empirical data (only for the ‘high-pass’ implementation) and later  
1055 spline-interpolated. An adapted version of MSE calculations was used for all settings [64], in  
1056 which scale-wise entropy was estimated across discontinuous data segments. The estimation of  
1057 scale-wise entropy across trials allows for reliable estimation of coarse-scale entropy without  
1058 requiring long, continuous signals, while quickly converging with estimates from continuous  
1059 segments [64].

1060 **Multi-scale calculation of similarity bounds.** Following scale-specific filtering, all  
1061 implementations re-calculated sample entropy for the scale-specific signal. Crucially, in  
1062 ‘Original’ applications [11, 12], the *similarity bound* is calculated only once from the original  
1063 broadband signal. As a result of filtering, the scale-wise signal SD decreases relative to the  
1064 global, scale-invariant similarity bound [29]. To overcome this limitation, we recomputed the  
1065 similarity bound for each scale factor, thereby normalizing MSE with respect to changes in  
1066 overall time series variation at each scale (.5 x SD of scale-wise signal).

1067 **Scale factor notation.** As the interpretation of estimates at each scale is bound to the scale-  
1068 wise spectral content, our Figures indicate spectral bounds of the scale-wise signals alongside  
1069 the scale factor as follows: for the low- and band-pass implementation, we indicate the low-  
1070 pass frequency as calculated above as the highest resolvable (i.e., Nyquist) frequency in the  
1071 scale-specific signal. Likewise, for the high-pass implementation, we indicate the high-pass  
1072 limit as the lowest resolvable frequency in the scale-specific signal. In the main text, we refer  
1073 to higher scale factors as ‘coarser’ scales’ and lower scale factors as ‘finer’ scales, in line with  
1074 the common use in the literature. Note that the sampling rate of the simulated data was 250 Hz,  
1075 whereas the empirical data had a sampling rate of 500 Hz.

## 1076 Calculation of power spectral density (PSD)

1077 Power spectral density estimates were computed by means of a Fast Fourier Transform  
1078 (FFT) over 3 second pseudo-trials for 41 logarithmically spaced frequencies between 2 and 64

1079 Hz (employing a Hanning-taper; segments zero-padded to 10 seconds) and subsequently  
1080 averaged. Spectral power was  $\log_{10}$ -transformed to render power values more normally  
1081 distributed across subjects. Power spectral density (PSD) slopes were derived by linearly  
1082 regressing power values on  $\log_{10}$ -transformed frequencies (i.e., log-log fit). The spectral range  
1083 from 7-13 Hz was excluded from the background fit to exclude a bias by the narrowband alpha  
1084 peak [40, 49].

## 1085 **Detection of single-trial spectral events**

1086 Spectral power, even in the narrowband case, is unspecific to the occurrence of  
1087 systematic rhythmic events as it also characterizes periods of absent rhythmicity [e.g., 139].  
1088 Specifically detecting rhythmic episodes in the ongoing signal alleviates this problem, as  
1089 periods of absent rhythmicity are excluded. To investigate the potential relation between the  
1090 occurrence of stereotypic spectral events and narrowband entropy, we detected single-trial  
1091 spectral events using the extended BOSC method [42, 140, 141] and probed their relation to  
1092 individual entropy estimates. In short, this method identifies stereotypic ‘rhythmic’ events at  
1093 the single-trial level, with the assumption that such events have significantly higher power than  
1094 the  $1/f$  background and occur for a minimum number of cycles at a particular frequency. This  
1095 effectively dissociates narrowband spectral peaks from the arrhythmic background spectrum.  
1096 Here, we used a one cycle threshold during detection, while defining the power threshold as the  
1097 95<sup>th</sup> percentile above the individual background power. A 5-cycle wavelet was used to provide  
1098 the time-frequency transformations for 49 logarithmically-spaced center frequencies between  
1099 1 and 64 Hz. Rhythmic episodes were detected as described in [42]. Following the detection of  
1100 spectral events, the rate of spectral episodes longer than 3 cycles was computed by counting the  
1101 number of episodes with a mean frequency that fell in a moving window of 3 adjacent center  
1102 frequencies. This produced a channel-by-frequency representation of spectral event rates,  
1103 which were the basis for subsequent significance testing. Event rates and statistical results were  
1104 averaged within frequency bins from 8-12 Hz (alpha) and 14-20 Hz (beta) to assess relations to  
1105 narrowband entropy and for the visualization of topographies. To visualize the stereotypic  
1106 depiction of single-trial alpha and beta events, the original time series were time-locked to the  
1107 trough of individual spectral episodes and averaged across events [c.f., 57]. More specifically,  
1108 the trough was chosen to be the local minimum during the spectral episode that was closest to  
1109 the maximum power of the wavelet-transformed signal. To better estimate the local minimum,  
1110 the signal was low-pass filtered at 25 Hz for alpha and bandpass-filtered between 10 and 25 Hz  
1111 for beta using a 6<sup>th</sup> order Butterworth filter. A post-hoc duration threshold of one cycle was  
1112 used for the visualization of beta events, whereas a three-cycle criterion was used to visualize  
1113 alpha events. Alpha and beta events were visualized at channels POz and Cz, respectively.

1114

## 1115 **Examination of transient irregularity shifts during alpha events**

1116

1117 The relation of narrowband alpha events to broadband irregularity represents an  
1118 empirical question of interest (see Introduction). We examined the relation between these  
1119 signatures, while controlling for the circular, intrinsic relation between alpha-based regularity  
1120 and entropy. To highlight the issue of circularity, we first simulated expected links between the



1121 two signals by creating 250 ms of data, consisting of (a) aperiodic slopes of  $\frac{1}{f^1}$ , (b) aperiodic  
1122 slopes of  $\frac{1}{f^{1.2}}$ , as well as equivalent versions with superimposed alpha rhythms of unit amplitude  
1123 (c, d). We probed the practical potential of a 8-15 Hz band-stop filter (6<sup>th</sup> order Butterworth) to  
1124 remove the influence of alpha on broadband entropy. Entropy was calculated for the first MSE  
1125 scale, reflecting broadband sample entropy. Next, in empirical data, we leveraged the temporal  
1126 on- and offsets of individual alpha segments (8-15 Hz; > 3 cycles) as identified via rhythm  
1127 detection and segmented the original data to include 250 ms preceding and following event on-  
1128 and offsets (see S8 Figure for empirical examples). For each subject, all events across posterior-  
1129 occipital channels at which event number was highest (see Fig 11B1) were included in this  
1130 analysis. At each channel we performed a median split of events according to their amplitude  
1131 (high/low). We created versions with and without application of 8-15 Hz bandstop filters (S8  
1132 Figure), followed by the calculation of sample entropy. We assessed the impact of transient  
1133 alpha events on irregularity via paired t-tests between alpha on vs. off contrasts, both at event  
1134 on- and the offset, and individually for low and high amplitude events. As post-hoc tests, we  
1135 assessed potential interactions between alpha presence and age via linear mixed effect models  
1136 (random subject intercept). To probe the presence of a broadband effect, we assessed the  
1137 spectral slopes for the same segments. To improve spectral resolution, we "auto-sandwiched"  
1138 each 250 ms segment by appending it in x- & y-inverted forms at the original segment's on-  
1139 and offset. This effectively increased segment duration to 750 ms, while retaining  
1140 autocorrelative properties. We then calculated an FFT of each segment (2-90 Hz; 45  $2^x$  steps;  
1141 Hanning taper; 4 Hz smoothing box; zero-padded to 10 s). Linear slopes were fit in log-log  
1142 space, after excluding the 5-20 Hz range to remove the influence of the rhythmic alpha peak.  
1143 Individual entropy estimates were averaged across alpha on- and offsets to remove  
1144 measurement noise, and were statistically compared between alpha on & off periods via paired  
1145 t-tests.

## 1146 **Statistical analyses**

1147 Spectral power and entropy were compared across age groups within condition by  
1148 means of independent samples t-tests; cluster-based permutation tests [142] were performed to  
1149 control for multiple comparisons. Initially, a clustering algorithm formed clusters based on  
1150 significant t-tests of individual data points ( $p < .05$ , two-sided; cluster entry threshold) with the  
1151 spatial constraint of a cluster covering a minimum of three neighboring channels. Then, the  
1152 significance of the observed cluster-level statistic, based on the summed t-values within the  
1153 cluster, was assessed by comparison to the distribution of all permutation-based cluster-level  
1154 statistics. The final cluster p-value that we report in all Figs was assessed as the proportion of  
1155 1000 Monte Carlo iterations in which the cluster-level statistic was exceeded. Cluster  
1156 significance was indicated by p-values below .025 (two-sided cluster significance threshold).  
1157 Effect sizes for MSE age differences with different filter settings were computed on the basis  
1158 of the cluster results in the 'Original' version. This was also the case for analyses of partial  
1159 correlations. Raw MSE values were extracted from channels with indicated age differences at  
1160 the initial three scales 1-3 (>65 Hz) for fine MSE and scales 39-41 (<6.5 Hz) for coarse MSE.  
1161  $R^2$  was calculated based on the t-values of an unpaired t-test:  $R^2 = \frac{t^2}{t^2 + df}$  [143]. The measure

1162 describes the variance in the age difference explained by the measure of interest, with the square  
 1163 root being identical to Pearson’s correlation coefficient between continuous individual values  
 1164 and binary age group. Effect sizes were compared using the r-to-z-transform and a successive  
 1165 comparison of the z-value difference against zero:  $Z_{Diff} = \frac{z1-z2}{\text{sqrt}(\frac{1}{N1-3} + \frac{1}{N2-3})}$  [144]. Unmasked t-  
 1166 values are presented in support of the assessment of raw statistics in our data [145].

## 1167 Acknowledgements

1168 We thank our research assistants and participants for their contributions to the present work.

## 1169 Supporting information

1170 S1 File. Systematic literature search assessing the prevalence of global similarity bounds.

1171

1172 S2 File. Simulation of MSE’s sensitivity to pink noise slope variation.

1173

1174 S3 File. Surrogate analysis of age effects

1175

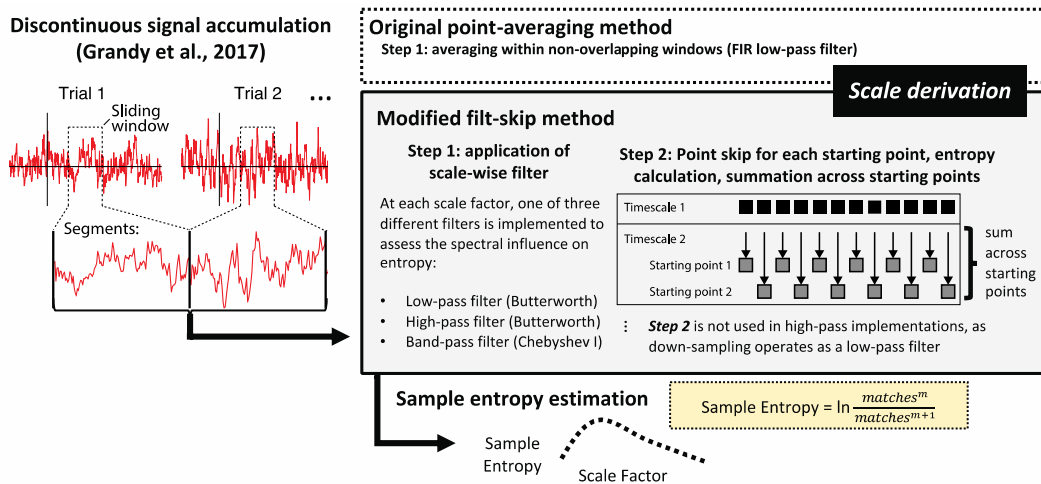

1176 S1 Figure. Overview of modified (mMSE) adaptations. First, mMSE uses data aggregation across (here:  
 1177 pseudo-) trials to allow the estimation of coarse scales also from sparse neuroimaging data [64]. These aggregated  
 1178 signals are then filtered at each scale prior to sample entropy calculation. The ‘Original’ implementation uses  
 1179 ‘point averaging’ for different scale factors, which is equivalent to a FIR low-pass filter. In adapted applications,  
 1180 we used a two-step implementation, which we refer to as ‘filt-skip’, which first applies a scale-wise low-, high- or  
 1181 band-pass filter, and then performs point skipping to down-sample the resulting signals. Finally, the sample  
 1182 entropy of these signals is similarly assessed using the sample entropy algorithm, which results in multiscale  
 1183 entropy estimates. Figure adapted with permission from [121].  
 1184

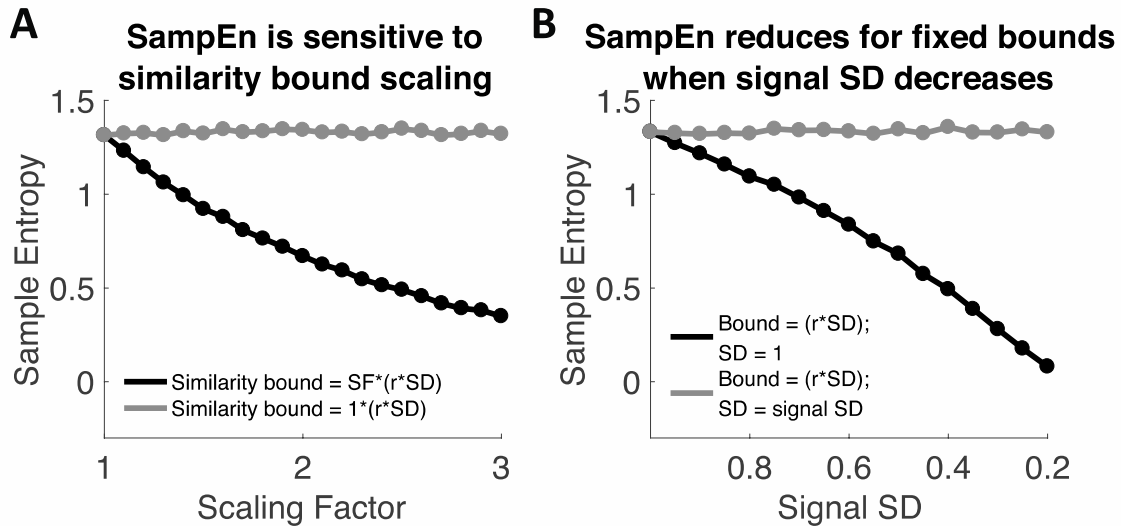

1185  
1186  
1187  
1188  
1189  
1190  
1191  
1192  
1193  
1194  
1195  
1196  
1197

**S2 Figure. Liberal similarity bounds reduce sample entropy in simulations.** (A) The plot shows the sample entropy of simulated white noise signals with constant signal standard deviation (SD) of 1, but varying similarity bounds. We denote this as a function of a scaling factor (SF) to highlight that such variation may arise from either variation in  $r$ , SD or both. Note that the  $r$  parameter is usually fixed and the SD matches the signal SD (gray line), thus normalizing total signal variance. However, when the similarity bound systematically increases relative to the signal SD, entropy estimates progressively decrease (black line). (B) A similar scenario applies when fixed and large bounds are applied to signals of decreasing variance, as is the case across MSE time scales due to scale-wise filtering (Fig 2). Whereas no bias is observed when scale-wise signal SD is used for the calculation of similarity bounds (grey line), entropy estimates systematically decrease when the SD of the original signal are used (black line). Hence, the mismatched similarity bounds introduced entropy decreases although no changes to the structure of the (here white noise) signals were introduced.

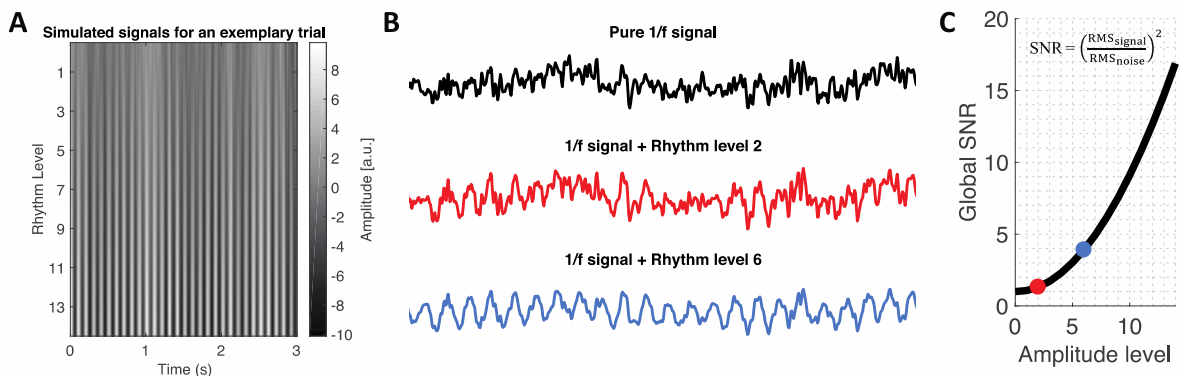

1198  
1199  
1200  
1201  
1202  
1203

**S3 Figure. Examples of simulated rhythmicity projected into pink noise.** (A) Top-down view of time-series from an exemplary simulated trial for a pure 1/f signal pink noise signal and at different magnitudes of added alpha rhythmicity. (B) Exemplary time series in 2D view. The red time series indicates an example time series for the level of rhythmicity shown in Fig 5. (C) Simulated SNR as a function of amplitude level. The dots indicate SNR for the levels depicted in panel B.

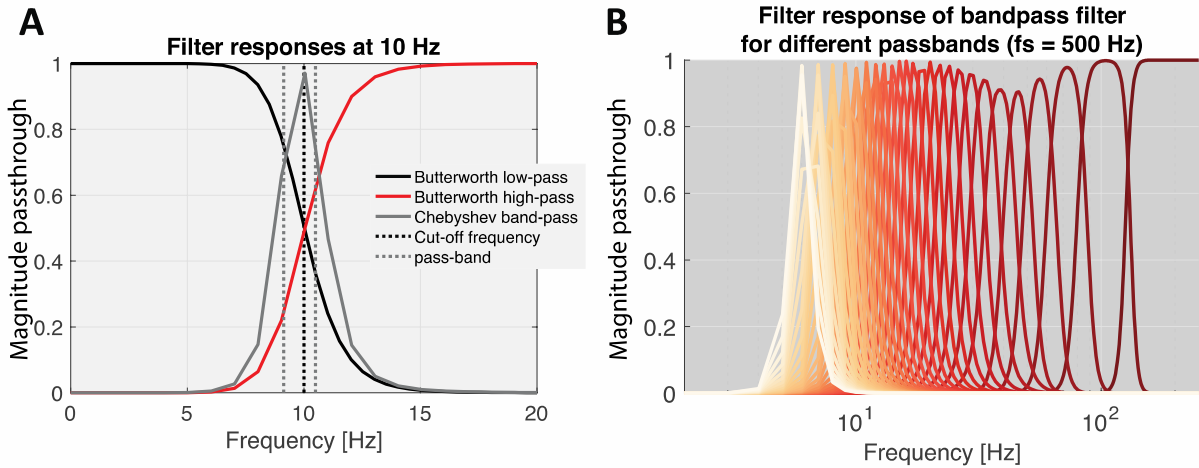

1204  
1205 **S4 Figure. Filter magnitude responses.** (A) Filter magnitude responses at 10 Hz. Note that magnitude responses  
1206 have been squared due to two-pass filtering to achieve zero-phase offsets. (B) Filter magnitudes of Bandpass filters  
1207 (3<sup>rd</sup> order type I Chebyshev filter with 1dB passband ripple) at different time scales (red-to-orange indicating fine-  
1208 to-coarse time scales). Note that only a high-pass filter (6<sup>th</sup> order Butterworth filter) is applied at the first scale.

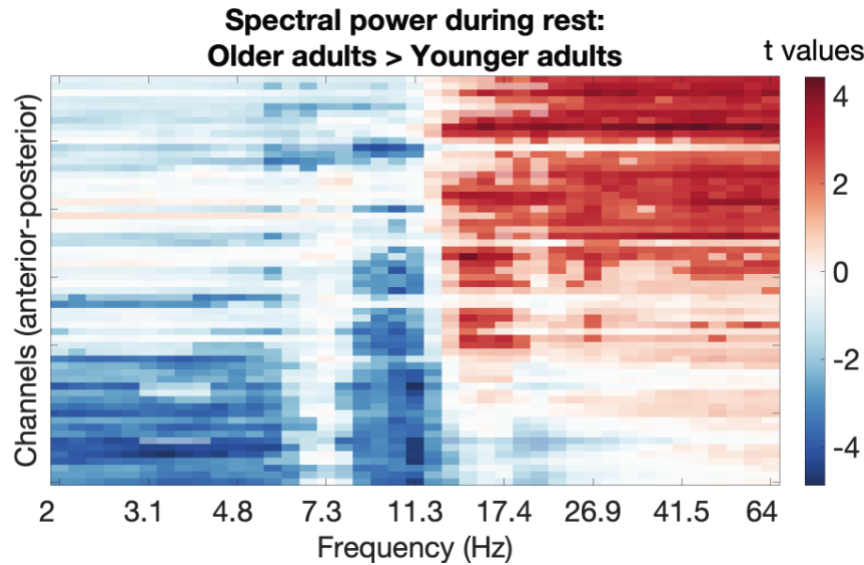

1209  
1210 **S5 Figure. T-values for age group differences in spectral power (OA > YA).** Statistical significance ( $p < .05$ )  
1211 was assessed by means of cluster-based permutation tests and is indicated via opacity.

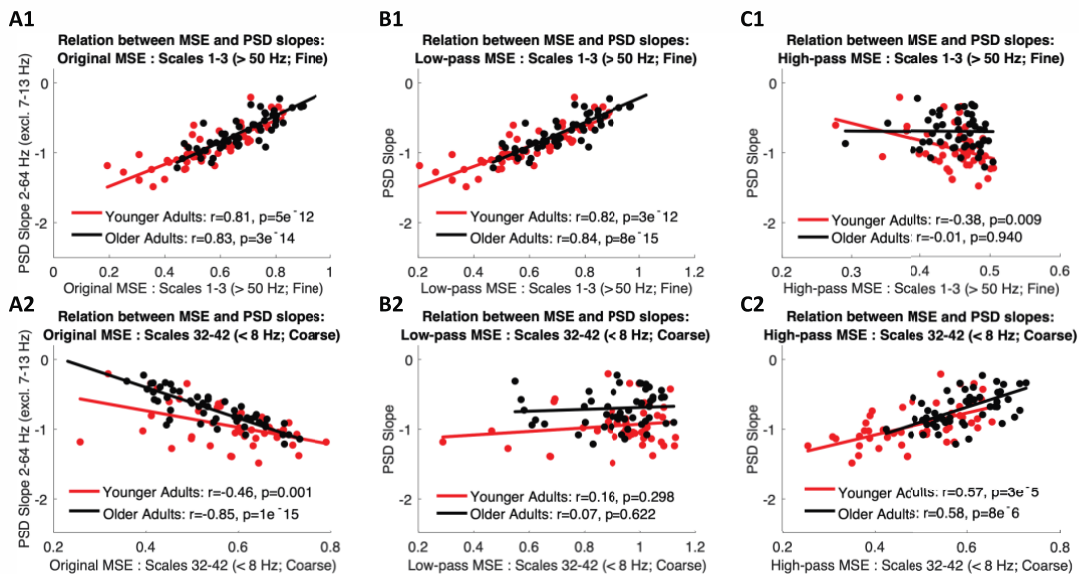

1212

1213 **S6 Figure. Methods- and scale-dependent associations between sample entropy and PSD slopes.** ‘Original’  
 1214 settings indicate a strong positive association at fine scales (A1) that turns negative at coarse scales (A2), likely  
 1215 due to coarse-scale biases by the scale-invariant similarity criterion. In line with this notion, scale-wise adaptation  
 1216 of thresholds retains the fine-scale effect (B1), while abolishing the coarse-scale inversion (B2). Crucially, the  
 1217 entropy of exclusively high-frequency signals does not positively relate to PSD slopes (C1), whereas the  
 1218 association reemerges once slow fluctuations are added into the signal (C2).  
 1219

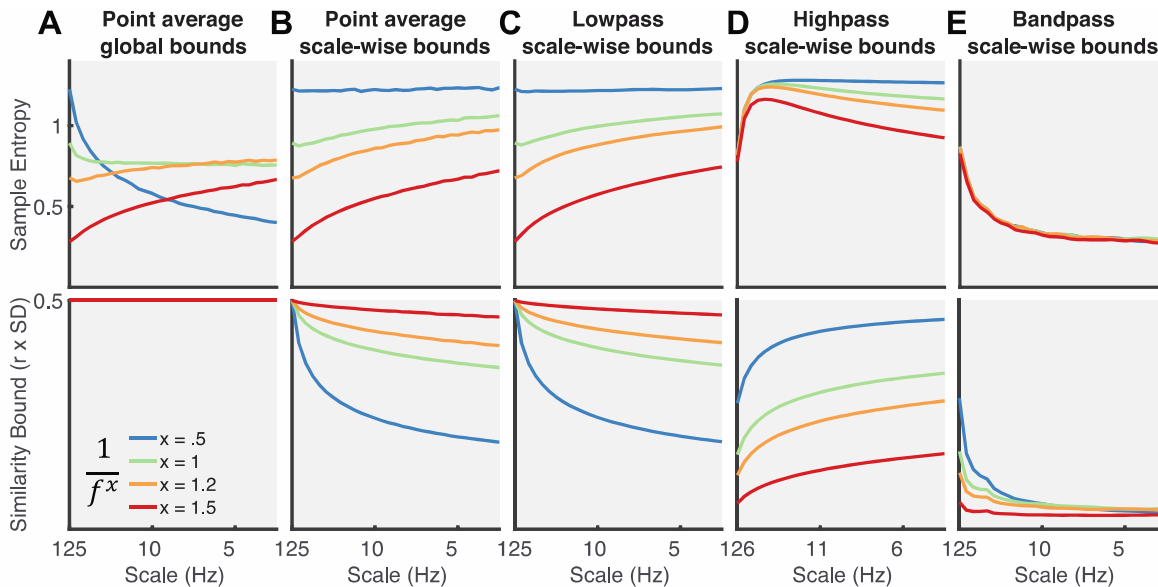

1220  
 1221  
 1222  
 1223  
 1224  
 1225  
 1226  
 1227

**S7 Figure. Results of different simulated spectral slope coefficients for the different filter implementations.**  
 (A) Using traditional implementations,  $1/f$  variation introduces scale-dependent crossover effects, including scale-  
 dependent entropy decreases for the signals approaching white noise. (B, C, D) In contrast, control for scale-wise  
 variance indicates broad scale entropy offsets without crossovers. (E) Bandpass entropy is not modulated by  
 broadband effects, as expected by the absence of multi-scale information at local scales.

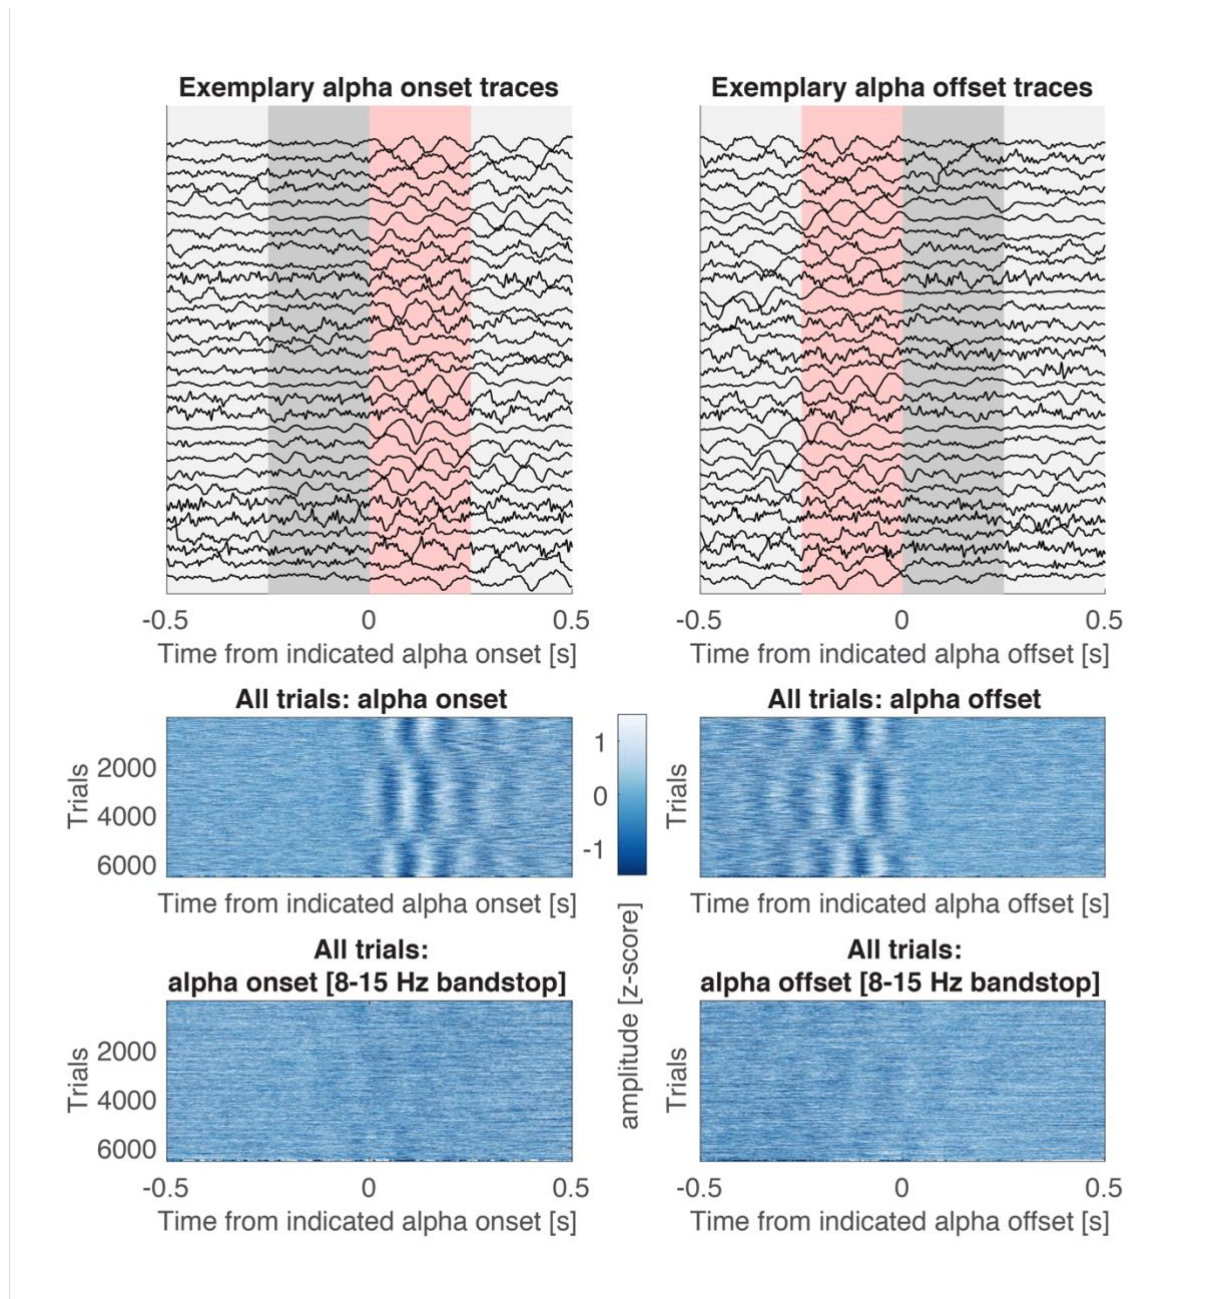

1228  
1229  
1230  
1231  
1232  
1233  
1234  
1235  
1236  
1237  
1238

**S8 Figure. Signal traces around indicated large alpha event on- and offsets.** (A) Thirty randomly selected traces across subjects for alpha on- (A1) and offsets (A2). The grey background indicates the 250 ms pre- and post-alpha windows used for the calculation of sample entropy (see Fig 11). The red background highlights segments following indicated alpha onsets, and preceding alpha offsets, that were used to assess irregularity during transient alpha events. Note that 250 ms segments may overlap in the case of short rhythmicity of around 3 cycles. (B) All events around on- and offsets. Data were sorted by the instantaneous phase at +100 ms after indicated alpha onset (B1) and -100 ms prior to indicated alpha offset (B2). Instantaneous phase was calculated from a Hilbert transform applied to 8-15 Hz bandpass filtered signals. (C) Same as in B, but plotted for signals after 8-15 Hz bandstop filter application. All displayed traces were z-scored for presentation purposes.

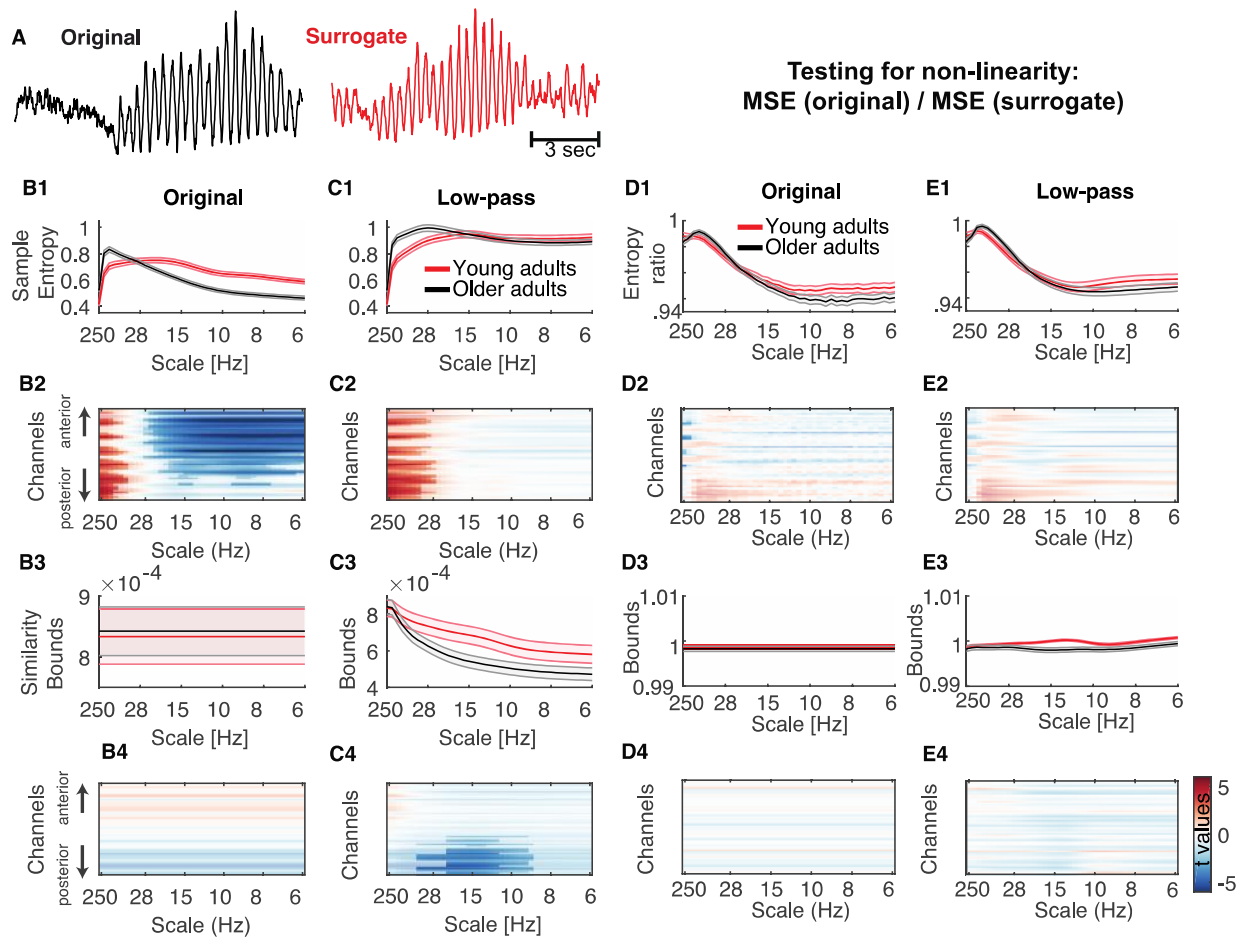

1239  
1240  
1241  
1242  
1243  
1244  
1245  
1246  
1247  
1248  
1249  
1250  
1251  
1252  
1253  
1254  
1255  
1256

S9 Figure. Results of surrogate analysis, testing for non-linear contributions to MSE age effects. (A) Examples of original and surrogate data for a random 3 s segment from an occipital channel with strong alpha rhythms. Phase randomization alters higher-order (non-linear) frequency interactions while preserving the linear power characteristics of the original data. If non-linear contributions are necessary for MSE age effects, no age effects should be indicated for entropy estimates of surrogate data (B) Results for “Original” MSE analysis on phase-shuffled data indicate similar effects as observed for original data (Fig 7A), suggesting that linear characteristics were sufficient for the observed age effects. (C) Results for low-pass MSE analysis on phase-shuffled data indicate similar effects as observed for original data (Fig 7C), suggesting that linear characteristics were sufficient for the observed age effects. (D, E) In addition to assessing the necessity of non-linear contributions, we further assessed whether age differences would be indicated for non-linear contributions, after accounting for linear power characteristics. The ratio of MSE estimates for original vs. surrogate data indicates unique non-linear contributions for either age group. The obtained results were remarkably similar for both original (D) and low-pass implementations (E), indicating the successful elimination of power-based biases. However, no statistically significant age differences were indicated, suggesting that non-linear contributions are at most minor, and may require higher statistical power for their assessment.

## 1257 **Additional Information**

### 1258 **Data availability**

1259 Raw empirical data is provided at <https://osf.io/q3vxm/>. Code used to produce simulations,  
1260 empirical analyses and figures is provided at [https://git.mpib-berlin.mpg.de/LNDG/rhythms\\_entropy](https://git.mpib-berlin.mpg.de/LNDG/rhythms_entropy). The code implementing the mMSE algorithm is  
1261 available from <https://github.com/LNDG/mMSE>.  
1262

### 1263 **Funding**

1264 This study was conducted within the ‘Lifespan Neural Dynamics Group’ within the Max  
1265 Planck UCL Centre for Computational Psychiatry and Ageing Research in the Max Planck  
1266 Institute for Human Development (MPIB) in Berlin, Germany. DDG and NAK were supported  
1267 by an Emmy Noether Programme grant (to DDG) from the German Research Foundation, and  
1268 by the Max Planck UCL Centre for Computational Psychiatry and Ageing Research. JQK is a  
1269 pre-doctoral fellow supported by the International Max Planck Research School on  
1270 Computational Methods in Psychiatry and Ageing Research (IMPRS COMP2PSYCH). The  
1271 participating institutions are the Max Planck Institute for Human Development, Berlin,  
1272 Germany, and University College London, London, UK. For more information, see  
1273 <https://www.mps-ucl-centre.mpg.de/en/comp2psych>.

### 1274 **Competing interests**

1275 The authors declare that there are no conflicts of interest.

### 1276 **Author contributions**

1277 Conceptualization – JQK, NAK, DDG  
1278 Data Curation – JQK, NAK  
1279 Formal Analysis – JQK  
1280 Funding Acquisition – DDG  
1281 Investigation – JQK  
1282 Methodology – JQK, NAK, DDG  
1283 Project Administration – JQK, DDG  
1284 Resources – NAK, DDG  
1285 Software – JQK, NAK  
1286 Supervision - DDG  
1287 Validation – JQK  
1288 Visualization – JQK  
1289 Writing – Original Draft Preparation – JQK  
1290 Writing – Review & Editing – JQK, NAK, DDG



## 1291 **References**

- 1292 1. Buzsaki G, Draguhn A. Neuronal oscillations in cortical networks. *Science*.  
1293 2004;304(5679):1926-9. doi: 10.1126/science.1099745. PubMed PMID:  
1294 WOS:000222241600031.
- 1295 2. Wang XJ. Neurophysiological and computational principles of cortical rhythms in  
1296 cognition. *Physiol Rev*. 2010;90(3):1195-268. Epub 2010/07/29. doi:  
1297 10.1152/physrev.00035.2008. PubMed PMID: 20664082; PubMed Central PMCID:  
1298 PMCPMC2923921.
- 1299 3. Breakspear M. Dynamic models of large-scale brain activity. *Nat Neurosci*.  
1300 2017;20(3):340-52. doi: 10.1038/nn.4497. PubMed PMID: WOS:000394920400007.
- 1301 4. Vakorin VA, McIntosh AR. Mapping the Multiscale Information Content of Complex  
1302 Brain Signals. *Comput Neurosci-Mit*. 2012:183-208. PubMed PMID:  
1303 WOS:000315291000011.
- 1304 5. Stam CJ. Nonlinear dynamical analysis of EEG and MEG: review of an emerging  
1305 field. *Clin Neurophysiol*. 2005;116(10):2266-301. Epub 2005/08/24. doi:  
1306 10.1016/j.clinph.2005.06.011. PubMed PMID: 16115797.
- 1307 6. Garrett DD, Samanez-Larkin GR, MacDonald SW, Lindenberger U, McIntosh AR,  
1308 Grady CL. Moment-to-moment brain signal variability: a next frontier in human brain  
1309 mapping? *Neurosci Biobehav Rev*. 2013;37(4):610-24. Epub 2013/03/06. doi:  
1310 10.1016/j.neubiorev.2013.02.015. PubMed PMID: 23458776; PubMed Central  
1311 PMCID: PMCPMC3732213.
- 1312 7. Ghosh A, Rho Y, McIntosh AR, Kotter R, Jirsa VK. Noise during rest enables the  
1313 exploration of the brain's dynamic repertoire. *Plos Comput Biol*.  
1314 2008;4(10):e1000196. Epub 2008/10/11. doi: 10.1371/journal.pcbi.1000196. PubMed  
1315 PMID: 18846206; PubMed Central PMCID: PMCPMC2551736.
- 1316 8. Garrett DD, Samanez-Larkin GR, MacDonald SWS, Lindenberger U, McIntosh AR,  
1317 Grady CL. Moment-to-moment brain signal variability: A next frontier in human brain  
1318 mapping? *Neuroscience and Biobehavioral Reviews*. 2013;37(4):610-24. doi:  
1319 10.1016/j.neubiorev.2013.02.015. PubMed PMID: WOS:000318580100006.
- 1320 9. Garrett DD, McIntosh AR, Grady CL. Moment-to-moment signal variability in the  
1321 human brain can inform models of stochastic facilitation now. *Nat Rev Neurosci*.  
1322 2011;12(10):612; author reply Epub 2011/09/08. doi: 10.1038/nrn3061-c1. PubMed  
1323 PMID: 21897432.
- 1324 10. Shew WL, Yang HD, Yu S, Roy R, Plenz D. Information Capacity and Transmission  
1325 Are Maximized in Balanced Cortical Networks with Neuronal Avalanches. *J*  
1326 *Neurosci*. 2011;31(1):55-63. doi: 10.1523/Jneurosci.4637-10.2011. PubMed PMID:  
1327 WOS:000285915100007.
- 1328 11. Costa M, Goldberger AL, Peng CK. Multiscale entropy analysis of complex  
1329 physiologic time series. *Phys Rev Lett*. 2002;89(6). doi:  
1330 10.1103/PhysRevLett.89.068102. PubMed PMID: WOS:000177009600047.
- 1331 12. Costa M, Goldberger AL, Peng CK. Multiscale entropy analysis of biological signals.  
1332 *Phys Rev E*. 2005;71(2). doi: 10.1103/PhysRevE.71.021906. PubMed PMID:  
1333 WOS:000228245700047.

- 1334 13. Richman JS, Moorman JR. Physiological time-series analysis using approximate  
1335 entropy and sample entropy. *Am J Physiol-Heart C*. 2000;278(6):H2039-H49.  
1336 PubMed PMID: WOS:000087573500038.
- 1337 14. Bruce EN, Bruce MC, Vennelaganti S. Sample Entropy Tracks Changes in  
1338 Electroencephalogram Power Spectrum With Sleep State and Aging. *J Clin*  
1339 *Neurophysiol*. 2009;26(4):257-66. doi: 10.1097/WNP.0b013e3181b2f1e3. PubMed  
1340 PMID: WOS:000268746000007.
- 1341 15. Jaworska N, Wang HY, Smith DM, Blier P, Knott V, Protzner AB. Pre-treatment EEG  
1342 signal variability is associated with treatment success in depression. *Neuroimage-Clin*.  
1343 2018;17:368-77. doi: 10.1016/j.nicl.2017.10.035. PubMed PMID:  
1344 WOS:000426180300040.
- 1345 16. McIntosh AR, Vakorin V, Kovacevic N, Wang H, Diaconescu A, Protzner AB.  
1346 Spatiotemporal Dependency of Age-Related Changes in Brain Signal Variability.  
1347 *Cereb Cortex*. 2014;24(7):1806-17. doi: 10.1093/cercor/bht030. PubMed PMID:  
1348 WOS:000338110900010.
- 1349 17. Miskovic V, MacDonald KJ, Rhodes LJ, Cote KA. Changes in EEG multiscale  
1350 entropy and power-law frequency scaling during the human sleep cycle. *Hum Brain*  
1351 *Mapp*. 2019;40(2):538-51. doi: 10.1002/hbm.24393. PubMed PMID:  
1352 WOS:000460481300014.
- 1353 18. Wang H, McIntosh AR, Kovacevic N, Karachalios M, Protzner AB. Age-related  
1354 Multiscale Changes in Brain Signal Variability in Pre-task versus Post-task Resting-  
1355 state EEG. *J Cogn Neurosci*. 2016;28(7):971-84. Epub 2016/03/05. doi:  
1356 10.1162/jocn\_a\_00947. PubMed PMID: 26942319.
- 1357 19. Sleimen-Malkoun R, Perdikis D, Muller V, Blanc JL, Huys R, Temprado JJ, et al.  
1358 Brain Dynamics of Aging: Multiscale Variability of EEG Signals at Rest and during  
1359 an Auditory Oddball Task(1,2,3). *Eneuro*. 2015;2(3). doi: 10.1523/ENEURO.0067-  
1360 14.2015. PubMed PMID: WOS:000218581400012.
- 1361 20. Werkle-Bergner M, Grandy TH, Chicherio C, Schmiedek F, Lovden M, Lindenberger  
1362 U. Coordinated within-Trial Dynamics of Low-Frequency Neural Rhythms Controls  
1363 Evidence Accumulation. *J Neurosci*. 2014;34(25):8519-28. doi:  
1364 10.1523/Jneurosci.3801-13.2014. PubMed PMID: WOS:000338449200014.
- 1365 21. Yang AC, Wang SJ, Lai KL, Tsai CF, Yang CH, Hwang JP, et al. Cognitive and  
1366 neuropsychiatric correlates of EEG dynamic complexity in patients with Alzheimer's  
1367 disease. *Prog Neuro-Psychoph*. 2013;47:52-61. doi: 10.1016/j.pnpbp.2013.07.022.  
1368 PubMed PMID: WOS:000326682300009.
- 1369 22. Takahashi T, Cho RY, Mizuno T, Kikuchi M, Murata T, Takahashi K, et al.  
1370 Antipsychotics reverse abnormal EEG complexity in drug-naive schizophrenia: A  
1371 multiscale entropy analysis. *Neuroimage*. 2010;51(1):173-82. doi:  
1372 10.1016/j.neuroimage.2010.02.009. PubMed PMID: WOS:000276480200018.
- 1373 23. Mejias JF, Murray JD, Kennedy H, Wang XJ. Feedforward and feedback frequency-  
1374 dependent interactions in a large-scale laminar network of the primate cortex. *Sci Adv*.  
1375 2016;2(11). doi: 10.1126/sciadv.1601335. PubMed PMID: WOS:000391267800032.
- 1376 24. Buzsaki G, Logothetis N, Singer W. Scaling Brain Size, Keeping Timing:  
1377 Evolutionary Preservation of Brain Rhythms. *Neuron*. 2013;80(3):751-64. doi:  
1378 10.1016/j.neuron.2013.10.002. PubMed PMID: WOS:000326609900019.

- 1379 25. von Stein A, Sarnthein J. Different frequencies for different scales of cortical  
1380 integration: from local gamma to long range alpha/theta synchronization. *Int J*  
1381 *Psychophysiol.* 2000;38(3):301-13. doi: 10.1016/S0167-8760(00)00172-0. PubMed  
1382 PMID: WOS:000165915000009.
- 1383 26. Fries P. Neuronal Gamma-Band Synchronization as a Fundamental Process in Cortical  
1384 Computation. *Annu Rev Neurosci.* 2009;32:209-24. doi:  
1385 10.1146/annurev.neuro.051508.135603. PubMed PMID: WOS:000268504100009.
- 1386 27. Courtiol J, Perdikis D, Petkoski S, Muller V, Huys R, Sleimen-Malkoun R, et al. The  
1387 multiscale entropy: Guidelines for use and interpretation in brain signal analysis. *J*  
1388 *Neurosci Meth.* 2016;273:175-90. doi: 10.1016/j.jneumeth.2016.09.004. PubMed  
1389 PMID: WOS:000387195800017.
- 1390 28. Costa M, Goldberger AL, Peng CK. Comment on "Multiscale entropy analysis of  
1391 complex physiologic time series" - Reply. *Phys Rev Lett.* 2004;92(8). doi:  
1392 10.1103/PhysRevLett.92.089804. PubMed PMID: WOS:000189266100069.
- 1393 29. Nikulin VV, Brismar T. Comment on "Multiscale entropy analysis of complex  
1394 physiologic time series". *Phys Rev Lett.* 2004;92(8). doi:  
1395 10.1103/PhysRevLett.92.089803. PubMed PMID: WOS:000189266100068.
- 1396 30. Shafiei G, Zeighami Y, Clark CA, Coull JT, Nagano-Saito A, Leyton M, et al.  
1397 Dopamine Signaling Modulates the Stability and Integration of Intrinsic Brain  
1398 Networks. *Cereb Cortex.* 2019;29(1):397-409. doi: 10.1093/cercor/bhy264. PubMed  
1399 PMID: WOS:000459518500030.
- 1400 31. Azami H, Escudero J. Coarse-Graining Approaches in Univariate Multiscale Sample  
1401 and Dispersion Entropy. *Entropy.* 2018;20(2). doi: 10.3390/e20020138. PubMed  
1402 PMID: WOS:000426793900061.
- 1403 32. Miskovic V, Owens M, Kuntzleman K, Gibb BE. Charting moment-to-moment brain  
1404 signal variability from early to late childhood. *Cortex.* 2016;83:51-61. Epub  
1405 2016/08/02. doi: 10.1016/j.cortex.2016.07.006. PubMed PMID: 27479615; PubMed  
1406 Central PMCID: PMC5042835.
- 1407 33. Valencia JF, Porta A, Vallverdu M, Claria F, Baranowski R, Orłowska-Baranowska E,  
1408 et al. Refined Multiscale Entropy: Application to 24-h Holter Recordings of Heart  
1409 Period Variability in Healthy and Aortic Stenosis Subjects. *Ieee T Bio-Med Eng.*  
1410 2009;56(9):2202-13. doi: 10.1109/Tbme.2009.2021986. PubMed PMID:  
1411 WOS:000269154100008.
- 1412 34. Faes L, Porta A, Javorka M, Nollo G. Efficient Computation of Multiscale Entropy  
1413 over Short Biomedical Time Series Based on Linear State-Space Models. *Complexity.*  
1414 2017. doi: Artn 1768264  
1415 10.1155/2017/1768264. PubMed PMID: WOS:000418241600001.
- 1416 35. Xiong WT, Faes L, Ivanov PC. Entropy measures, entropy estimators, and their  
1417 performance in quantifying complex dynamics: Effects of artifacts, nonstationarity,  
1418 and long-range correlations. *Phys Rev E.* 2017;95(6). doi: ARTN 062114  
1419 10.1103/PhysRevE.95.062114. PubMed PMID: WOS:000403077800001.
- 1420 36. Buzsaki G, Mizuseki K. The log-dynamic brain: how skewed distributions affect  
1421 network operations. *Nat Rev Neurosci.* 2014;15(4):264-78. doi: 10.1038/nrn3687.  
1422 PubMed PMID: WOS:000333256600012.

- 1423 37. He BYJ. Scale-free brain activity: past, present, and future. *Trends Cogn Sci.*  
1424 2014;18(9):480-7. doi: 10.1016/j.tics.2014.04.003. PubMed PMID:  
1425 WOS:000341613000010.
- 1426 38. Miller KJ, Sorensen LB, Ojemann JG, den Nijs M. Power-Law Scaling in the Brain  
1427 Surface Electric Potential. *Plos Comput Biol.* 2009;5(12). doi: ARTN e1000609  
1428 10.1371/journal.pcbi.1000609. PubMed PMID: WOS:000274229000027.
- 1429 39. Donoghue T, Dominguez J, Voytek B. Electrophysiological Frequency Band Ratio  
1430 Measures Conflate Periodic and Aperiodic Neural Activity. *bioRxiv.* 2020.
- 1431 40. Waschke L, Wostmann M, Obleser J. States and traits of neural irregularity in the age-  
1432 varying human brain. *Sci Rep-Uk.* 2017;7. doi: 10.1038/s41598-017-17766-4.  
1433 PubMed PMID: WOS:000417689400005.
- 1434 41. Haller M, Donoghue T, Peterson E, Varma P, Sebastian P, Gao R, et al.  
1435 Parameterizing neural power spectra. *bioRxiv.* 2018.
- 1436 42. Kosciessa JQ, Grandy TH, Garrett DD, Werkle-Bergner M. Single-trial  
1437 characterization of neural rhythms: Potential and challenges. *Neuroimage.*  
1438 2019;116331. doi: <https://doi.org/10.1016/j.neuroimage.2019.116331>.
- 1439 43. Lopes da Silva F. EEG and MEG: relevance to neuroscience. *Neuron.*  
1440 2013;80(5):1112-28. Epub 2013/12/10. doi: 10.1016/j.neuron.2013.10.017. PubMed  
1441 PMID: 24314724.
- 1442 44. Park JH, Kim S, Kim CH, Cichocki A, Kim K. Multiscale entropy analysis of EEG  
1443 from patients under different pathological conditions. *Fractals.* 2007;15(4):399-404.  
1444 doi: 10.1142/S0218348x07003691. PubMed PMID: WOS:000252021600010.
- 1445 45. McIntosh AR. *Neurocognitive Aging and Brain Signal Complexity.* Oxford University  
1446 Press; 2019.
- 1447 46. McIntosh AR, Kovacevic N, Itier RJ. Increased Brain Signal Variability Accompanies  
1448 Lower Behavioral Variability in Development. *Plos Comput Biol.* 2008;4(7). doi:  
1449 10.1371/journal.pcbi.1000106. PubMed PMID: WOS:000260039300027.
- 1450 47. Leirer VM, Wienbruch C, Kolassa S, Schlee W, Elbert T, Kolassa IT. Changes in  
1451 cortical slow wave activity in healthy aging. *Brain Imaging Behav.* 2011;5(3):222-8.  
1452 doi: 10.1007/s11682-011-9126-3. PubMed PMID: WOS:000293498500007.
- 1453 48. Vlahou EL, Thurm F, Kolassa IT, Schlee W. Resting-state slow wave power, healthy  
1454 aging and cognitive performance. *Sci Rep-Uk.* 2014;4. doi: 10.1038/srep05101.  
1455 PubMed PMID: WOS:000336516800002.
- 1456 49. Voytek B, Kramer MA, Case J, Lepage KQ, Tempesta ZR, Knight RT, et al. Age-  
1457 Related Changes in 1/f Neural Electrophysiological Noise. *J Neurosci.*  
1458 2015;35(38):13257-65. doi: 10.1523/Jneurosci.2332-14.2015. PubMed PMID:  
1459 WOS:000363660200027.
- 1460 50. Buzsáki G. *Rhythms of the brain.* Oxford ; New York: Oxford University Press; 2006.  
1461 xiv, 448 p. p.
- 1462 51. Manning JR, Jacobs J, Fried I, Kahana MJ. Broadband Shifts in Local Field Potential  
1463 Power Spectra Are Correlated with Single-Neuron Spiking in Humans. *J Neurosci.*  
1464 2009;29(43):13613-20. doi: 10.1523/Jneurosci.2041-09.2009. PubMed PMID:  
1465 WOS:000271266600020.
- 1466 52. Miller KJ, Honey CJ, Hermes D, Rao RPN, denNijs M, Ojemann JG. Broadband  
1467 changes in the cortical surface potential track activation of functionally diverse

- 1468 neuronal populations. *Neuroimage*. 2014;85:711-20. doi:  
1469 10.1016/j.neuroimage.2013.08.070. PubMed PMID: WOS:000328870400009.
- 1470 53. Miller KJ, Zanos S, Fetz EE, den Nijs M, Ojemann JG. Decoupling the Cortical Power  
1471 Spectrum Reveals Real-Time Representation of Individual Finger Movements in  
1472 Humans. *J Neurosci*. 2009;29(10):3132-7. doi: 10.1523/Jneurosci.5506-08.2009.  
1473 PubMed PMID: WOS:000264093200015.
- 1474 54. Gao R, Peterson EJ, Voytek B. Inferring synaptic excitation/inhibition balance from  
1475 field potentials. *Neuroimage*. 2017;158:70-8. doi: 10.1016/j.neuroimage.2017.06.078.  
1476 PubMed PMID: WOS:000411450600008.
- 1477 55. Klimesch W, Sauseng P, Hanslmayr S. EEG alpha oscillations: the inhibition-timing  
1478 hypothesis. *Brain Res Rev*. 2007;53(1):63-88. Epub 2006/08/05. doi:  
1479 10.1016/j.brainresrev.2006.06.003. PubMed PMID: 16887192.
- 1480 56. Hipp JF, Siegel M. Dissociating neuronal gamma-band activity from cranial and  
1481 ocular muscle activity in EEG. *Front Hum Neurosci*. 2013;7. doi:  
1482 10.3389/fnhum.2013.00338. PubMed PMID: WOS:000321588600001.
- 1483 57. Sherman MA, Lee S, Law R, Haegens S, Thorn CA, Hamalainen MS, et al. Neural  
1484 mechanisms of transient neocortical beta rhythms: Converging evidence from humans,  
1485 computational modeling, monkeys, and mice. *P Natl Acad Sci USA*.  
1486 2016;113(33):E4885-E94. doi: 10.1073/pnas.1604135113. PubMed PMID:  
1487 WOS:000381399200018.
- 1488 58. Shin H, Law R, Tsutsui S, Moore CI, Jones SR. The rate of transient beta frequency  
1489 events predicts behavior across tasks and species. *Elife*. 2017;6. doi:  
1490 10.7554/eLife.29086. PubMed PMID: WOS:000414984800001.
- 1491 59. Haegens S, Nacher V, Luna R, Romo R, Jensen O. alpha-Oscillations in the monkey  
1492 sensorimotor network influence discrimination performance by rhythmical inhibition  
1493 of neuronal spiking. *P Natl Acad Sci USA*. 2011;108(48):19377-82. doi:  
1494 10.1073/pnas.1117190108. PubMed PMID: WOS:000297463100057.
- 1495 60. Peterson EJ, Voytek B. Alpha oscillations control cortical gain by modulating  
1496 excitatory-inhibitory background activity. *bioRxiv*. 2017.
- 1497 61. Becker R, Van de Ville D, Kleinschmidt A. Alpha Oscillations Reduce Temporal  
1498 Long-Range Dependence in Spontaneous Human Brain Activity. *J Neurosci*.  
1499 2018;38(3):755-64. Epub 2017/11/24. doi: 10.1523/JNEUROSCI.0831-17.2017.  
1500 PubMed PMID: 29167403; PubMed Central PMCID: PMC6596188.
- 1501 62. Waschke L, Tune S, Obleser J. Local cortical desynchronization and pupil-linked  
1502 arousal differentially shape brain states for optimal sensory performance. *Elife*.  
1503 2019;8. Epub 2019/12/11. doi: 10.7554/eLife.51501. PubMed PMID: 31820732.
- 1504 63. Faes L, Pereira MA, Silva ME, Pernice R, Busacca A, Javorka M, et al. Multiscale  
1505 information storage of linear long-range correlated stochastic processes. *Phys Rev E*.  
1506 2019;99(3). doi: ARTN 032115  
1507 10.1103/PhysRevE.99.032115. PubMed PMID: WOS:000461060500002.
- 1508 64. Grandy TH, Garrett DD, Schmiedek F, Werkle-Bergner M. On the estimation of brain  
1509 signal entropy from sparse neuroimaging data. *Sci Rep-Uk*. 2016;6. doi:  
1510 10.1038/srep23073. PubMed PMID: WOS:000372915300001.
- 1511 65. Berger H. Über das Elektrenkephalogramm des Menschen. *Archiv für Psychiatrie und*  
1512 *Nervenkrankheiten*. 1929;87(1):527-70. doi: 10.1007/BF01797193.

- 1513 66. Sheehan TC, Sreekumar V, Inati SK, Zaghoul KA. Signal Complexity of Human  
1514 Intracranial EEG Tracks Successful Associative-Memory Formation across  
1515 Individuals. *J Neurosci*. 2018;38(7):1744-55. doi: 10.1523/Jneurosci.2389-17.2017.  
1516 PubMed PMID: WOS:000424987700012.
- 1517 67. Kaffashi F, Foglyano R, Wilson CG, Loparo KA. The effect of time delay on  
1518 Approximate & Sample Entropy calculations. *Physica D*. 2008;237(23):3069-74. doi:  
1519 10.1016/j.physd.2008.06.005. PubMed PMID: WOS:000261463000010.
- 1520 68. Ferguson KA, Cardin JA. Mechanisms underlying gain modulation in the cortex. *Nat*  
1521 *Rev Neurosci*. 2020;21(2):80-92. doi: 10.1038/s41583-019-0253-y. PubMed PMID:  
1522 WOS:000508147700001.
- 1523 69. Destexhe A, Rudolph M, Pare D. The high-conductance state of neocortical neurons in  
1524 vivo. *Nat Rev Neurosci*. 2003;4(9):739-51. doi: 10.1038/nrn1198. PubMed PMID:  
1525 WOS:000185052600017.
- 1526 70. Contreras D, Steriade M. Synchronization of low-frequency rhythms in  
1527 corticothalamic networks. *Neuroscience*. 1997;76(1):11-24. PubMed PMID:  
1528 WOS:A1997VY25600003.
- 1529 71. Harris KD, Thiele A. Cortical state and attention. *Nat Rev Neurosci*. 2011;12(9):509-  
1530 23. doi: 10.1038/nrn3084. PubMed PMID: WOS:000294049200013.
- 1531 72. Marguet SL, Harris KD. State-Dependent Representation of Amplitude-Modulated  
1532 Noise Stimuli in Rat Auditory Cortex. *J Neurosci*. 2011;31(17):6414-20. doi:  
1533 10.1523/Jneurosci.5773-10.2011. PubMed PMID: WOS:000289934600018.
- 1534 73. Peterson EJ, Rosen BQ, Campbell AM, Belger A, Voytek B. 1/f neural noise is a  
1535 better predictor of schizophrenia than neural oscillations. *bioRxiv*. 2018.
- 1536 74. Freeman WJ, Zhai J. Simulated power spectral density (PSD) of background  
1537 electrocorticogram (ECoG). *Cognitive Neurodynamics*. 2009;3(1):97-103. doi:  
1538 10.1007/s11571-008-9064-y. PubMed PMID: WOS:000266413200009.
- 1539 75. Lombardi F, Herrmann HJ, de Arcangelis L. Balance of excitation and inhibition  
1540 determines 1/f power spectrum in neuronal networks. *Chaos*. 2017;27(4). doi: Artn  
1541 047402  
1542 10.1063/1.4979043. PubMed PMID: WOS:000399154600012.
- 1543 76. Bedard C, Gomes JM, Bal T, Destexhe A. A framework to reconcile frequency scaling  
1544 measurements, from intracellular recordings, local-field potentials, up to EEG and  
1545 MEG signals. *Journal of Integrative Neuroscience*. 2017;16(1):3-18. doi: 10.3233/Jin-  
1546 160001. PubMed PMID: WOS:000395669700002.
- 1547 77. Linden H, Pettersen KH, Einevoll GT. Intrinsic dendritic filtering gives low-pass  
1548 power spectra of local field potentials. *J Comput Neurosci*. 2010;29(3):423-44. doi:  
1549 10.1007/s10827-010-0245-4. PubMed PMID: WOS:000284162900005.
- 1550 78. Dugue L, Marque P, VanRullen R. The Phase of Ongoing Oscillations Mediates the  
1551 Causal Relation between Brain Excitation and Visual Perception. *J Neurosci*.  
1552 2011;31(33):11889-93. doi: 10.1523/Jneurosci.1161-11.2011. PubMed PMID:  
1553 WOS:000293950300016.
- 1554 79. Lange J, Oostenveld R, Fries P. Reduced Occipital Alpha Power Indexes Enhanced  
1555 Excitability Rather than Improved Visual Perception. *J Neurosci*. 2013;33(7):3212-20.  
1556 doi: 10.1523/Jneurosci.3755-12.2013. PubMed PMID: WOS:000314887200042.

- 1557 80. Romei V, Rihs T, Brodbeck V, Thut G. Resting electroencephalogram alpha-power  
1558 over posterior sites indexes baseline visual cortex excitability. *Neuroreport*.  
1559 2008;19(2):203-8. doi: DOI 10.1097/WNR.0b013e3282f454c4. PubMed PMID:  
1560 WOS:000252645000014.
- 1561 81. Romei V, Brodbeck V, Michel C, Amedi A, Pascual-Leone A, Thut G. Spontaneous  
1562 fluctuations in posterior alpha-band EEG activity reflect variability in excitability of  
1563 human visual areas. *Cereb Cortex*. 2008;18(9):2010-8. Epub 2007/12/21. doi:  
1564 10.1093/cercor/bhm229. PubMed PMID: 18093905; PubMed Central PMCID:  
1565 PMCPMC2517102.
- 1566 82. Misisic B, Vakorin VA, Paus T, McIntosh AR. Functional embedding predicts the  
1567 variability of neural activity. *Front Syst Neurosci*. 2011;5:90. Epub 2011/12/14. doi:  
1568 10.3389/fnsys.2011.00090. PubMed PMID: 22164135; PubMed Central PMCID:  
1569 PMCPMC3225043.
- 1570 83. Deco G, Jirsa VK, McIntosh AR. Resting brains never rest: computational insights  
1571 into potential cognitive architectures. *Trends Neurosci*. 2013;36(5):268-74. Epub  
1572 2013/04/09. doi: 10.1016/j.tins.2013.03.001. PubMed PMID: 23561718.
- 1573 84. Deco G, Jirsa VK, McIntosh AR. Emerging concepts for the dynamical organization  
1574 of resting-state activity in the brain. *Nat Rev Neurosci*. 2011;12(1):43-56. Epub  
1575 2010/12/21. doi: 10.1038/nrn2961. PubMed PMID: 21170073.
- 1576 85. Pereda E, Gamundi A, Rial R, Gonzalez J. Non-linear behaviour of human EEG:  
1577 fractal exponent versus correlation dimension in awake and sleep stages. *Neurosci*  
1578 *Lett*. 1998;250(2):91-4. Epub 1998/08/11. doi: 10.1016/s0304-3940(98)00435-2.  
1579 PubMed PMID: 9697926.
- 1580 86. Heisz JJ, Gould M, McIntosh AR. Age-related Shift in Neural Complexity Related to  
1581 Task Performance and Physical Activity. *J Cognitive Neurosci*. 2015;27(3):605-13.  
1582 doi: 10.1162/jocn\_a\_00725. PubMed PMID: WOS:000349078000015.
- 1583 87. Murray JD, Bernacchia A, Freedman DJ, Romo R, Wallis JD, Cai XY, et al. A  
1584 hierarchy of intrinsic timescales across primate cortex. *Nat Neurosci*.  
1585 2014;17(12):1661-3. doi: 10.1038/nn.3862. PubMed PMID: WOS:000345484000012.
- 1586 88. Duarte R, Seeholzer A, Zilles K, Morrison A. Synaptic patterning and the timescales  
1587 of cortical dynamics. *Curr Opin Neurobiol*. 2017;43:156-65. doi:  
1588 10.1016/j.conb.2017.02.007. PubMed PMID: WOS:000403424400021.
- 1589 89. Sowell ER, Peterson BS, Thompson PM, Welcome SE, Henkenius AL, Toga AW.  
1590 Mapping cortical change across the human life span. *Nat Neurosci*. 2003;6(3):309-15.  
1591 doi: 10.1038/nn1008. PubMed PMID: WOS:000181178300020.
- 1592 90. Raz N, Lindenberger U, Rodrigue KM, Kennedy KM, Head D, Williamson A, et al.  
1593 Regional brain changes in aging healthy adults: General trends, individual differences  
1594 and modifiers. *Cereb Cortex*. 2005;15(11):1676-89. doi: 10.1093/cercor/bhi044.  
1595 PubMed PMID: WOS:000232595700003.
- 1596 91. Bender AR, Volkle MC, Raz N. Differential aging of cerebral white matter in middle-  
1597 aged and older adults: A seven-year follow-up. *Neuroimage*. 2016;125:74-83. doi:  
1598 10.1016/j.neuroimage.2015.10.030. PubMed PMID: WOS:000366647500008.
- 1599 92. Tatti R, Haley MS, Swanson OK, Tselha T, Maffei A. Neurophysiology and  
1600 Regulation of the Balance Between Excitation and Inhibition in Neocortical Circuits.

- 1601 Biol Psychiat. 2017;81(10):821-31. doi: 10.1016/j.biopsych.2016.09.017. PubMed  
1602 PMID: WOS:000400335100003.
- 1603 93. Hua TM, Kao CC, Sun QY, Li XR, Zhou YF. Decreased proportion of GABA  
1604 neurons accompanies age-related degradation of neuronal function in cat striate  
1605 cortex. Brain Research Bulletin. 2008;75(1):119-25. doi:  
1606 10.1016/j.brainresbull.2007.08.001. PubMed PMID: WOS:000252489900017.
- 1607 94. Leventhal AG, Wang YC, Pu ML, Zhou YF, Ma YY. GABA and its agonists  
1608 improved visual cortical function in senescent monkeys. Science.  
1609 2003;300(5620):812-5. doi: DOI 10.1126/science.1082874. PubMed PMID:  
1610 WOS:000182579800055.
- 1611 95. Lalwani P, Gagnon H, Cassady K, Simmonite M, Peltier S, Seidler RD, et al. Neural  
1612 distinctiveness declines with age in auditory cortex and is associated with auditory  
1613 GABA levels. Neuroimage. 2019;201. doi: UNSP 116033  
1614 10.1016/j.neuroimage.2019.116033. PubMed PMID: WOS:000487755700019.
- 1615 96. Schliebs R, Arendt T. The cholinergic system in aging and neuronal degeneration.  
1616 Behav Brain Res. 2011;221(2):555-63. doi: 10.1016/j.bbr.2010.11.058. PubMed  
1617 PMID: WOS:000291282700021.
- 1618 97. Li SC, Rieckmann A. Neuromodulation and aging: implications of aging neuronal  
1619 gain control on cognition. Curr Opin Neurobiol. 2014;29:148-58. doi:  
1620 10.1016/j.conb.2014.07.009. PubMed PMID: WOS:000347128200021.
- 1621 98. Mcnamara B, Wiesenfeld K. Theory of Stochastic Resonance. Phys Rev A.  
1622 1989;39(9):4854-69. doi: DOI 10.1103/PhysRevA.39.4854. PubMed PMID:  
1623 WOS:A1989U565300060.
- 1624 99. Wiesenfeld K, Moss F. Stochastic Resonance and the Benefits of Noise - from Ice  
1625 Ages to Crayfish and Squids. Nature. 1995;373(6509):33-6. doi: DOI  
1626 10.1038/373033a0. PubMed PMID: WOS:A1995QA23900046.
- 1627 100. McDonnell MD, Ward LM. The benefits of noise in neural systems: bridging theory  
1628 and experiment. Nat Rev Neurosci. 2011;12(7):415-26. Epub 2011/06/21. doi:  
1629 10.1038/nrn3061. PubMed PMID: 21685932.
- 1630 101. MacDonald SWS, Nyberg L, Backman L. Intra-individual variability in behavior:  
1631 links to brain structure, neurotransmission and neuronal activity. Trends in  
1632 Neurosciences. 2006;29(8):474-80. doi: 10.1016/j.tins.2006.06.011. PubMed PMID:  
1633 WOS:000240184400007.
- 1634 102. Voytek B, Knight RT. Dynamic Network Communication as a Unifying Neural Basis  
1635 for Cognition, Development, Aging, and Disease. Biol Psychiat. 2015;77(12):1089-97.  
1636 doi: 10.1016/j.biopsych.2015.04.016. PubMed PMID: WOS:000355138500011.
- 1637 103. Ishii R, Canuet L, Aoki Y, Hata M, Iwase M, Ikeda S, et al. Healthy and Pathological  
1638 Brain Aging: From the Perspective of Oscillations, Functional Connectivity, and  
1639 Signal Complexity. Neuropsychobiology. 2017;75(4):151-61. Epub 2018/02/22. doi:  
1640 10.1159/000486870. PubMed PMID: 29466802.
- 1641 104. Caplan JB, Bottomley M, Kang P, Dixon RA. Distinguishing rhythmic from non-  
1642 rhythmic brain activity during rest in healthy neurocognitive aging. Neuroimage.  
1643 2015;112:341-52. Epub 2015/03/15. doi: 10.1016/j.neuroimage.2015.03.001. PubMed  
1644 PMID: 25769279; PubMed Central PMCID: PMC4408255.



- 1645 105. Rossiter HE, Davis EM, Clark EV, Boudrias MH, Ward NS. Beta oscillations reflect  
1646 changes in motor cortex inhibition in healthy ageing. *Neuroimage*. 2014;91:360-5.  
1647 Epub 2014/01/21. doi: 10.1016/j.neuroimage.2014.01.012. PubMed PMID: 24440529;  
1648 PubMed Central PMCID: PMCPMC3988925.
- 1649 106. Cole S, Voytek B. Cycle-by-cycle analysis of neural oscillations. *bioRxiv*. 2018.
- 1650 107. Linkenkaer-Hansen K, Nikouline VV, Palva JM, Ilmoniemi RJ. Long-range temporal  
1651 correlations and scaling behavior in human brain oscillations. *J Neurosci*.  
1652 2001;21(4):1370-7. PubMed PMID: WOS:000166819700034.
- 1653 108. Mahjoory K, Cesnaite E, Hohlefeld FU, Villringer A, Nikulin VV. Power and  
1654 temporal dynamics of alpha oscillations at rest differentiate cognitive performance  
1655 involving sustained and phasic cognitive control. *Neuroimage*. 2019;188:135-44. doi:  
1656 10.1016/j.neuroimage.2018.12.001. PubMed PMID: WOS:000460064700012.
- 1657 109. Hardstone R, Poil SS, Schiavone G, Jansen R, Nikulin VV, Mansvelder HD, et al.  
1658 Detrended fluctuation analysis: a scale-free view on neuronal oscillations. *Frontiers in*  
1659 *Physiology*. 2012;3. doi: ARTN 450  
1660 10.3389/fphys.2012.00450. PubMed PMID: WOS:000209173000440.
- 1661 110. Wu SD, Wu CW, Lin SG, Lee KY, Peng CK. Analysis of complex time series using  
1662 refined composite multiscale entropy. *Phys Lett A*. 2014;378(20):1369-74. doi:  
1663 10.1016/j.physleta.2014.03.034. PubMed PMID: WOS:000335704900007.
- 1664 111. Heisz JJ, Shedden JM, McIntosh AR. Relating brain signal variability to knowledge  
1665 representation. *Neuroimage*. 2012;63(3):1384-92. doi:  
1666 10.1016/j.neuroimage.2012.08.018. PubMed PMID: WOS:000310379100040.
- 1667 112. Lippe S, Kovacevic N, McIntosh AR. Differential maturation of brain signal  
1668 complexity in the human auditory and visual system. *Front Hum Neurosci*. 2009;3.  
1669 doi: 10.3389/neuro.09.048.2009. PubMed PMID: WOS:000274619300008.
- 1670 113. Mizuno T, Takahashi T, Cho RY, Kikuchi M, Murata T, Takahashi K, et al.  
1671 Assessment of EEG dynamical complexity in Alzheimer's disease using multiscale  
1672 entropy. *Clin Neurophysiol*. 2010;121(9):1438-46. doi: 10.1016/j.clinph.2010.03.025.  
1673 PubMed PMID: WOS:000280555400007.
- 1674 114. Szostakiwskyj JMH, Willatt SE, Cortese F, Protzner AB. The modulation of EEG  
1675 variability between internally-and externally-driven cognitive states varies with  
1676 maturation and task performance. *Plos One*. 2017;12(7). doi:  
1677 10.1371/journal.pone.0181894. PubMed PMID: WOS:000406575700098.
- 1678 115. Takahashi T, Cho RY, Murata T, Mizuno T, Kikuchi M, Mizukami K, et al. Age-  
1679 related variation in EEG complexity to photic stimulation: A multiscale entropy  
1680 analysis. *Clin Neurophysiol*. 2009;120(3):476-83. doi: 10.1016/j.clinph.2008.12.043.  
1681 PubMed PMID: WOS:000265772400006.
- 1682 116. Carpentier SM, McCulloch AR, Brown TM, Ritter P, Wang Z, Salimpoor V, et al.  
1683 Complexity matching: brain signals mirror environment information patterns during  
1684 music listening and reward. *bioRxiv*. 2019.
- 1685 117. Raja Beharelle A, Kovacevic N, McIntosh AR, Levine B. Brain signal variability  
1686 relates to stability of behavior after recovery from diffuse brain injury. *Neuroimage*.  
1687 2012;60(2):1528-37. Epub 2012/01/21. doi: 10.1016/j.neuroimage.2012.01.037.  
1688 PubMed PMID: 22261371; PubMed Central PMCID: PMCPMC3303989.

- 1689 118. Catarino A, Churches O, Baron-Cohen S, Andrade A, Ring H. Atypical EEG  
1690 complexity in autism spectrum conditions: A multiscale entropy analysis. *Clin*  
1691 *Neurophysiol.* 2011;122(12):2375-83. doi: 10.1016/j.clinph.2011.05.004. PubMed  
1692 PMID: WOS:000296583000008.
- 1693 119. Misić B, Doesburg SM, Fatima Z, Vidal J, Vakorin VA, Taylor MJ, et al. Coordinated  
1694 Information Generation and Mental Flexibility: Large-Scale Network Disruption in  
1695 Children with Autism. *Cereb Cortex.* 2015;25(9):2815-27. doi:  
1696 10.1093/cercor/bhu082. PubMed PMID: WOS:000361464000042.
- 1697 120. Ueno K, Takahashi T, Takahashi K, Mizukami K, Tanaka Y, Wada Y.  
1698 Neurophysiological basis of creativity in healthy elderly people: A multiscale entropy  
1699 approach. *Clin Neurophysiol.* 2015;126(3):524-31. doi: 10.1016/j.clinph.2014.06.032.  
1700 PubMed PMID: WOS:000349616700015.
- 1701 121. Kloosterman NA, Kosciessa JQ, Lindenberger U, Fahrenfort JJ, Garrett DD. Boosting  
1702 Brain Signal Variability Underlies Liberal Shifts in Decision Bias. *bioRxiv.* 2019.
- 1703 122. Theiler J, Eubank S, Longtin A, Galdrikian B, Farmer JD. Testing for Nonlinearity in  
1704 Time-Series - the Method of Surrogate Data. *Physica D.* 1992;58(1-4):77-94. doi:  
1705 10.1016/0167-2789(92)90102-S. PubMed PMID: WOS:A1992JV85800006.
- 1706 123. Garrett DD, Grandy TH, Werkle-Bergner M. The neural forest and the trees: On  
1707 distinguishing the variance of a brain signal from its information content. *Annual*  
1708 *Alpine Brain Imaging Meeting; Champéry, Switzerland 2014.*
- 1709 124. Grandy TH, Garrett DD, Lindenberger U, Werkle-Bergner M. Exploring the limits of  
1710 complexity measures for the analysis of age differences in neural signals. *Dallas*  
1711 *Aging and Cognition Conference; Dallas, TX, USA 2013.*
- 1712 125. Takens F. Detecting Nonlinearities in Stationary Time Series. *Int J Bifurcat Chaos.*  
1713 1993;3(2):241-56. doi: 10.1142/S0218127493000192. PubMed PMID:  
1714 WOS:000209750900002.
- 1715 126. Simpraga S, Alvarez-Jimenez R, Mansvelder HD, van Gerven JMA, Groeneveld GJ,  
1716 Poil SS, et al. EEG machine learning for accurate detection of cholinergic intervention  
1717 and Alzheimer's disease. *Sci Rep-Uk.* 2017;7. doi: 10.1038/s41598-017-06165-4.  
1718 PubMed PMID: WOS:000405746500086.
- 1719 127. Stoyanov M, Gunzburger M, Burkardt J. Pink noise,  $1/f$  (alpha) noise, and their effect  
1720 on solutions of differential equations. *Int J Uncertain Quan.* 2011;1(3):257-78. doi:  
1721 10.1615/Int.J.UncertaintyQuantification.2011003089. PubMed PMID:  
1722 WOS:000209100100005.
- 1723 128. Oldfield RC. The Assessment and Analysis of Handedness: The Edinburgh Inventory.  
1724 *Neuropsychologia.* 1971;9(1):97-113. doi: 10.1016/0028-3932(71)90067-4. PubMed  
1725 PMID: WOS:A1971J199600013.
- 1726 129. Folstein MF, Robins LN, Helzer JE. The Mini-Mental State Examination. *Arch Gen*  
1727 *Psychiat.* 1983;40(7):812-. PubMed PMID: WOS:A1983QX57000014.
- 1728 130. Kessler J, Markowitsch H, Denzler P. Mini-mental-status-test (MMST). Göttingen:  
1729 Beltz Test GMBH; 2000.
- 1730 131. Oostenveld R, Praamstra P. The five percent electrode system for high-resolution EEG  
1731 and ERP measurements. *Clin Neurophysiol.* 2001;112(4):713-9. doi: 10.1016/S1388-  
1732 2457(00)00527-7. PubMed PMID: WOS:000168113100018.

- 1733 132. Oostenveld R, Fries P, Maris E, Schoffelen JM. FieldTrip: Open Source Software for  
1734 Advanced Analysis of MEG, EEG, and Invasive Electrophysiological Data. *Comput*  
1735 *Intel Neurosc.* 2011. doi: 10.1155/2011/156869. PubMed PMID:  
1736 WOS:000208906100004.
- 1737 133. Bell AJ, Sejnowski TJ. An Information Maximization Approach to Blind Separation  
1738 and Blind Deconvolution. *Neural Comput.* 1995;7(6):1129-59. doi:  
1739 10.1162/neco.1995.7.6.1129. PubMed PMID: WOS:A1995RZ70200001.
- 1740 134. Nolan H, Whelan R, Reilly RB. FASTER: Fully Automated Statistical Thresholding  
1741 for EEG artifact Rejection. *J Neurosci Meth.* 2010;192(1):152-62. doi:  
1742 10.1016/j.jneumeth.2010.07.015. PubMed PMID: WOS:000283477500020.
- 1743 135. Perrin F, Pernier J, Bertrand O, Echallier JF. Spherical Splines for Scalp Potential and  
1744 Current-Density Mapping. *Electroen Clin Neuro.* 1989;72(2):184-7. doi:  
1745 10.1016/0013-4694(89)90180-6. PubMed PMID: WOS:A1989T157400011.
- 1746 136. Heisz JJ, McIntosh AR. Applications of EEG Neuroimaging Data: Event-related  
1747 Potentials, Spectral Power, and Multiscale Entropy. *Jove-Journal of Visualized*  
1748 *Experiments.* 2013;(76). doi: 10.3791/50131. PubMed PMID:  
1749 WOS:000209227800013.
- 1750 137. Semmlow JL. *Biosignal and medical image processing*: CRC press; 2008.
- 1751 138. Widmann A, Schroger E, Maess B. Digital filter design for electrophysiological data -  
1752 a practical approach. *J Neurosci Meth.* 2015;250:34-46. doi:  
1753 10.1016/j.jneumeth.2014.08.002. PubMed PMID: WOS:000356978900005.
- 1754 139. Jones SR. When brain rhythms aren't 'rhythmic': implication for their mechanisms and  
1755 meaning. *Curr Opin Neurobiol.* 2016;40:72-80. doi: 10.1016/j.conb.2016.06.010.  
1756 PubMed PMID: WOS:000386405800012.
- 1757 140. Caplan JB, Madsen JR, Raghavachari S, Kahana MJ. Distinct patterns of brain  
1758 oscillations underlie two basic parameters of human maze learning. *J Neurophysiol.*  
1759 2001;86(1):368-80. PubMed PMID: WOS:000169955100033.
- 1760 141. Whitten TA, Hughes AM, Dickson CT, Caplan JB. A better oscillation detection  
1761 method robustly extracts EEG rhythms across brain state changes: The human alpha  
1762 rhythm as a test case. *Neuroimage.* 2011;54(2):860-74. doi:  
1763 10.1016/j.neuroimage.2010.08.064. PubMed PMID: WOS:000285486000013.
- 1764 142. Maris E, Oostenveld R. Nonparametric statistical testing of EEG- and MEG-data. *J*  
1765 *Neurosci Meth.* 2007;164(1):177-90. doi: 10.1016/j.jneumeth.2007.03.024. PubMed  
1766 PMID: WOS:000248170300019.
- 1767 143. Lakens D. Calculating and reporting effect sizes to facilitate cumulative science: a  
1768 practical primer for t-tests and ANOVAs. *Front Psychol.* 2013;4. doi:  
1769 10.3389/fpsyg.2013.00863. PubMed PMID: WOS:000331576200001.
- 1770 144. Brandner FA. A test of the significance of the difference of the correlation coefficients  
1771 in normal bivariate samples. *Biometrika.* 1933;25:102-9. doi: 10.1093/biomet/25.1-  
1772 2.102. PubMed PMID: WOS:000200863000008.
- 1773 145. Allen EA, Erhardt EB, Calhoun VD. Data Visualization in the Neurosciences:  
1774 Overcoming the Curse of Dimensionality. *Neuron.* 2012;74(4):603-8. doi:  
1775 10.1016/j.neuron.2012.05.001. PubMed PMID: WOS:000304747200004.  
1776

## Supplementary Information for

### Standard multiscale entropy reflects neural dynamics at mismatched temporal scales

Julian Q. Kosciessa, Niels A. Kloosterman, and Douglas D. Garrett

Email: [kosciessa@mpib-berlin.mpg.de](mailto:kosciessa@mpib-berlin.mpg.de); [garrett@mpib-berlin.mpg.de](mailto:garrett@mpib-berlin.mpg.de)

#### **S1 Text. Systematic literature search assessing the prevalence of global similarity bounds.**

We performed a systematic literature search to assess the prevalence of global similarity bounds in current neuroscientific applications (heart rate variability applications are specifically marked). We searched Pubmed (<https://www.ncbi.nlm.nih.gov/pubmed>) with the following terms: *(MSE AND sample entropy AND EEG) OR (MSE AND brain AND variability) OR (MSE AND EEG AND variability) OR (multiscale entropy AND EEG AND variability)*. We excluded any studies that did not assess multiscale entropy, including studies that were restricted to sample entropy at scale 1. In addition, we added references from the main text that were not captured by the systematic search (highlighted in grey). For MSE applications, we checked the text for a notion of how similarity bounds were computed, i.e., whether it was calculated as  $r \times SD$  of the original time series or the coarse-grained time series. The following sections list the results of this qualitative review and is purely intended to characterize the prevalence of global similarity bounds, not as a qualitative judgement on the claims made in any particular paper. Our literature search revealed the following papers. The relative amount of studies with presumably global similarity bounds was as follows  $(39+13)/(39+13+4) = 0,928$ ; i.e., > 90%.

#### **Scale-invariant similarity bounds ( $r \times$ global SD)**

*We chose this category, when the article contained the specific information that  $r$  was calculated from the original signal (i.e., scale-invariant).*

Azami, Fernandez, and Escudero (2017)

Azami, Rostaghi, Abasolo, and Escudero (2017)

Carpentier et al. (2019)

Escudero, Abasolo, Hornero, Espino, and Lopez (2006) [but they note the issue]

Grandy, Garrett, Schmiedek, and Werkle-Bergner (2016)

Hadoush, Alafeef, and Abdulhay (2019)

Kaur et al. (2019)

M. Liu, Song, Liang, Knopfel, and Zhou (2019)

H. Liu et al. (2017) [HRV]

Lu et al. (2015)

McIntosh, Kovacevic, and Itier (2008)

Mizuno et al. (2010)

Weng et al. (2015)

#: 13

#### **Unclear, assumed scale-invariant similarity bounds ( $r \times$ global SD)**

*We chose this category, when the article did not contain any information about how  $r$  was calculated, or no reference was made to scale-specific adaptations. For many papers, Costa, Goldberger, and Peng (2002, 2005) or Richman and Moorman (2000) were cited, which use scale-invariant implementations.*

Raja Beharelle, Kovacevic, McIntosh, and Levine (2012)

Bertrand et al. (2016)

Catarino, Churches, Baron-Cohen, Andrade, and Ring (2011)

Chen et al. (2015)(HRV)

Chen et al. (2018) (HRV)  
Li, Chen, Li, Wang, and Liu (2016)  
Chiu et al. (2015) (HRV)  
Courtiol et al. (2016)  
Gao, Hu, Liu, and Cao (2015)  
Harati, Crowell, Huang, Mayberg, and Nemati (2019)  
Harati, Crowell, Mayberg, Jun, and Nemati (2016)  
Hasegawa et al. (2018)  
Heisz and McIntosh (2013)  
Heisz, Shedden, and McIntosh (2012)  
Hu and Liang (2012) [RM]  
Hussain, Saeed, Awan, and Idris (2018)  
Hussain, Aziz, et al. (2018)  
Jaworska et al. (2018)  
Kuntzleman, Jack Rhodes, Harrington, and Miskovic (2018)  
Lin et al. (2019) [BOLD]  
H. Liu et al. (2018)  
H. Y. Liu et al. (2018)  
Q. Liu, Chen, Fan, Abbod, and Shieh (2015)  
Q. Liu, Chen, Fan, Abbod, and Shieh (2017)  
McIntosh et al. (2014)  
Misic et al. (2015)  
Misic, Vakorin, Paus, and McIntosh (2011)  
Miskovic, Owens, Kuntzleman, and Gibb (2016)  
Park, Kim, Kim, Cichocki, and Kim (2007)  
Roldan, Molina-Pico, Cuesta-Frau, Martinez, and Crespo (2011)  
Szostakiwskyj, Willatt, Cortese, and Protzner (2017)  
Takahashi et al. (2009)  
Takahashi et al. (2010)  
Takahashi et al. (2016)  
Ueno et al. (2015)  
Yang et al. (2013)  
H. Y. Wang, McIntosh, Kovacevic, Karachalios, and Protzner (2016)  
H. Wang, Pexman, Turner, Cortese, and Protzner (2018)  
Wei et al. (2014)

#: 39

#### **Scale-wise similarity bounds (r x scale-wise SD)**

*We chose this category, when the article either specified that scale-wise recalculation of r parameters was performed, or when the description could allow that inference.*

Fabris et al. (2014) [but with unclear variations in r]  
Sleimen-Malkoun et al. (2015)  
Valencia et al. (2009) [HRV]  
Zavala-Yoe, Ramirez-Mendoza, and Cordero (2015)

#: 4

#### **Not applicable**

*We chose this category, when multi-scale entropy was not used in the study (i.e., erroneous listing of paper).*

El-Gohary, McNames, and Elsas (2008)  
Erdogan, Yucel, and Akin (2014)  
Fernandez, Gomez, Hornero, and Lopez-Ibor (2013)  
Heunis, Aldrich, and de Vries (2016)  
Hier, Jao, and Brint (1994)  
Kielar et al. (2016) [BOLD MSE, single scale]  
Nazari et al. (2019)  
Puce, Berkovic, Cadusch, and Bladin (1994)  
Sinai, Phillips, Chertkow, and Kabani (2010)  
Verhaeghe, Gravel, and Reader (2010)  
Xu, Cui, Hong, and Liang (2015)

## Supplementary References

- Azami, H., Fernandez, A., & Escudero, J. (2017). Refined multiscale fuzzy entropy based on standard deviation for biomedical signal analysis. *Med Biol Eng Comput*, 55(11), 2037-2052. doi:10.1007/s11517-017-1647-5
- Azami, H., Rostaghi, M., Abasolo, D., & Escudero, J. (2017). Refined Composite Multiscale Dispersion Entropy and its Application to Biomedical Signals. *Ieee Transactions on Biomedical Engineering*, 64(12), 2872-2879. doi:10.1109/tbme.2017.2679136
- Bandt, C., & Pompe, B. (2002). Permutation entropy: A natural complexity measure for time series. *Physical Review Letters*, 88(17). doi:10.1103/PhysRevLett.88.174102
- Bertrand, J. A., McIntosh, A. R., Postuma, R. B., Kovacevic, N., Latreille, V., Panisset, M., . . . Gagnon, J. F. (2016). Brain Connectivity Alterations Are Associated with the Development of Dementia in Parkinson's Disease. *Brain Connectivity*, 6(3), 216-224. doi:10.1089/brain.2015.0390
- Carpentier, S. M., McCulloch, A. R., Brown, T. M., Ritter, P., Wang, Z., Salimpoor, V., . . . McIntosh, A. R. (2019). Complexity matching: brain signals mirror environment information patterns during music listening and reward. *bioRxiv*.
- Catarino, A., Churches, O., Baron-Cohen, S., Andrade, A., & Ring, H. (2011). Atypical EEG complexity in autism spectrum conditions: A multiscale entropy analysis. *Clinical Neurophysiology*, 122(12), 2375-2383. doi:10.1016/j.clinph.2011.05.004
- Chen, C. H., Huang, P. W., Tang, S. C., Shieh, J. S., Lai, D. M., Wu, A. Y., & Jeng, J. S. (2015). Complexity of Heart Rate Variability Can Predict Stroke-In-Evolution in Acute Ischemic Stroke Patients. *Sci Rep*, 5, 17552. doi:10.1038/srep17552
- Chen, C. H., Tang, S. C., Lee, D. Y., Shieh, J. S., Lai, D. M., Wu, A. Y., & Jeng, J. S. (2018). Impact of Supratentorial Cerebral Hemorrhage on the Complexity of Heart Rate Variability in Acute Stroke. *Sci Rep*, 8(1), 11473. doi:10.1038/s41598-018-29961-y
- Chiu, H. C., Lin, Y. H., Lo, M. T., Tang, S. C., Wang, T. D., Lu, H. C., . . . Peng, C. K. (2015). Complexity of cardiac signals for predicting changes in alpha-waves after stress in patients undergoing cardiac catheterization. *Scientific Reports*, 5. doi:10.1038/srep13315
- Costa, M., Goldberger, A. L., & Peng, C. K. (2002). Multiscale entropy analysis of complex physiologic time series. *Physical Review Letters*, 89(6). doi:10.1103/PhysRevLett.89.068102
- Costa, M., Goldberger, A. L., & Peng, C. K. (2005). Multiscale entropy analysis of biological signals. *Physical Review E*, 71(2). doi:10.1103/PhysRevE.71.021906
- Courtiol, J., Perdakis, D., Petkoski, S., Muller, V., Huys, R., Sleimen-Malkoun, R., & Jirsa, V. K. (2016). The multiscale entropy: Guidelines for use and interpretation in brain signal analysis. *Journal of Neuroscience Methods*, 273, 175-190. doi:10.1016/j.jneumeth.2016.09.004
- El-Gohary, M., McNames, J., & Elsas, S. (2008). User-guided interictal spike detection. *Conf Proc IEEE Eng Med Biol Soc*, 2008, 821-824. doi:10.1109/iembs.2008.4649280
- Erdogan, S. B., Yucel, M. A., & Akin, A. (2014). Analysis of task-evoked systemic interference in fNIRS measurements: insights from fMRI. *Neuroimage*, 87, 490-504. doi:10.1016/j.neuroimage.2013.10.024
- Escudero, J., Abasolo, D., Hornero, R., Espino, P., & Lopez, M. (2006). Analysis of electroencephalograms in Alzheimer's disease patients with multiscale entropy. *Physiological Measurement*, 27(11), 1091-1106. doi:10.1088/0967-3334/27/11/004
- Fabris, C., Sparacino, G., Sejling, A. S., Goljahani, A., Duun-Henriksen, J., Remvig, L. S., . . . Cobelli, C. (2014). Hypoglycemia-Related Electroencephalogram Changes Assessed by Multiscale Entropy. *Diabetes Technology & Therapeutics*, 16(10), 688-694. doi:10.1089/dia.2013.0331
- Fernandez, A., Gomez, C., Hornero, R., & Lopez-Ibor, J. J. (2013). Complexity and schizophrenia. *Prog Neuropsychopharmacol Biol Psychiatry*, 45, 267-276. doi:10.1016/j.pnpbp.2012.03.015
- Gao, J., Hu, J., Liu, F., & Cao, Y. (2015). Multiscale entropy analysis of biological signals: a fundamental bi-scaling law. *Front Comput Neurosci*, 9, 64. doi:10.3389/fncom.2015.00064
- Grandy, T. H., Garrett, D. D., Schmiedek, F., & Werkle-Bergner, M. (2016). On the estimation of brain signal entropy from sparse neuroimaging data. *Scientific Reports*, 6. doi:10.1038/srep23073
- Hadoush, H., Alafeef, M., & Abdulhay, E. (2019). Brain Complexity in Children with Mild and Severe Autism Spectrum Disorders: Analysis of Multiscale Entropy in EEG. *Brain Topogr*. doi:10.1007/s10548-019-00711-1
- Harati, S., Crowell, A., Huang, Y., Mayberg, H., & Nemati, S. (2019). Classifying Depression Severity in Recovery from Major Depressive Disorder via Dynamic Facial Features. *IEEE J Biomed Health Inform*. doi:10.1109/jbhi.2019.2930604
- Harati, S., Crowell, A., Mayberg, H., Jun, K., & Nemati, S. (2016). Discriminating clinical phases of recovery from major depressive disorder using the dynamics of facial expression. *Conf Proc IEEE Eng Med Biol Soc*, 2016, 2254-2257. doi:10.1109/embs.2016.7591178

- Hasegawa, C., Takahashi, T., Yoshimura, Y., Nobukawa, S., Ikeda, T., Saito, D. N., . . . Kikuchi, M. (2018). Developmental Trajectory of Infant Brain Signal Variability: A Longitudinal Pilot Study. *Front Neurosci*, *12*, 566. doi:10.3389/fnins.2018.00566
- Heisz, J. J., & McIntosh, A. R. (2013). Applications of EEG Neuroimaging Data: Event-related Potentials, Spectral Power, and Multiscale Entropy. *Journal of Visualized Experiments*(76). doi:10.3791/50131
- Heisz, J. J., Shedden, J. M., & McIntosh, A. R. (2012). Relating brain signal variability to knowledge representation. *Neuroimage*, *63*(3), 1384-1392. doi:10.1016/j.neuroimage.2012.08.018
- Heunis, T. M., Aldrich, C., & de Vries, P. J. (2016). Recent Advances in Resting-State Electroencephalography Biomarkers for Autism Spectrum Disorder-A Review of Methodological and Clinical Challenges. *Pediatr Neurol*, *61*, 28-37. doi:10.1016/j.pediatrneurol.2016.03.010
- Hier, D. B., Jao, C. S., & Brint, S. U. (1994). The Mental Status Expert (MSE): an expert system for scoring and interpreting the mental status examination. *Proc Annu Symp Comput Appl Med Care*, 1053.
- Hu, M., & Liang, H. (2012). Adaptive multiscale entropy analysis of multivariate neural data. *IEEE Trans Biomed Eng*, *59*(1), 12-15. doi:10.1109/tbme.2011.2162511
- Hussain, L., Aziz, W., Saeed, S., Shah, S. A., Nadeem, M. S. A., Awan, I. A., . . . Kazmi, S. Z. H. (2018). Quantifying the dynamics of electroencephalographic (EEG) signals to distinguish alcoholic and non-alcoholic subjects using an MSE based K-d tree algorithm. *Biomed Tech (Berl)*, *63*(4), 481-490. doi:10.1515/bmt-2017-0041
- Hussain, L., Saeed, S., Awan, I. A., & Idris, A. (2018). Multiscaled Complexity Analysis of EEG Epileptic Seizure Using Entropy-Based Techniques. *Archives of Neuroscience*, *5*(1). doi:10.5812/archneurosci.61161
- Jaworska, N., Wang, H., Smith, D. M., Blier, P., Knott, V., & Protzner, A. B. (2018). Pre-treatment EEG signal variability is associated with treatment success in depression. *Neuroimage Clin*, *17*, 368-377. doi:10.1016/j.nicl.2017.10.035
- Kaur, Y., Ouyang, G., Junge, M., Sommer, W., Liu, M., Zhou, C., & Hildebrandt, A. (2019). The reliability and psychometric structure of Multi-Scale Entropy measured from EEG signals at rest and during face and object recognition tasks. *J Neurosci Methods*, *326*, 108343. doi:10.1016/j.jneumeth.2019.108343
- Kielar, A., Deschamps, T., Chu, R. K., Jokel, R., Khatamian, Y. B., Chen, J. J., & Meltzer, J. A. (2016). Identifying Dysfunctional Cortex: Dissociable Effects of Stroke and Aging on Resting State Dynamics in MEG and fMRI. *Front Aging Neurosci*, *8*, 40. doi:10.3389/fnagi.2016.00040
- Kuntzelman, K., Jack Rhodes, L., Harrington, L. N., & Miskovic, V. (2018). A practical comparison of algorithms for the measurement of multiscale entropy in neural time series data. *Brain Cogn*, *123*, 126-135. doi:10.1016/j.bandc.2018.03.010
- Li, C. X., Chen, Y. N., Li, Y. J., Wang, J., & Liu, T. (2016). Complexity analysis of brain activity in attention-deficit/hyperactivity disorder: A multiscale entropy analysis. *Brain Research Bulletin*, *124*, 12-20. doi:10.1016/j.brainresbull.2016.03.007
- Lin, C., Lee, S. H., Huang, C. M., Chen, G. Y., Ho, P. S., Liu, H. L., . . . Wu, S. C. (2019). Increased brain entropy of resting-state fMRI mediates the relationship between depression severity and mental health-related quality of life in late-life depressed elderly. *J Affect Disord*, *250*, 270-277. doi:10.1016/j.jad.2019.03.012
- Liu, H., Yang, Z., Meng, F., Guan, Y., Ma, Y., Liang, S., . . . Li, L. (2017). Impairment of heart rhythm complexity in patients with drug-resistant epilepsy: An assessment with multiscale entropy analysis. *Epilepsy Research*, *138*, 11-17. doi:10.1016/j.epilepsyres.2017.10.002
- Liu, H., Yang, Z., Meng, F., Huang, L., Qu, W., Hao, H., . . . Li, L. (2018). Chronic vagus nerve stimulation reverses heart rhythm complexity in patients with drug-resistant epilepsy: An assessment with multiscale entropy analysis. *Epilepsy Behav*, *83*, 168-174. doi:10.1016/j.yebeh.2018.03.035
- Liu, H. Y., Yang, Z., Meng, F. G., Guan, Y. G., Ma, Y. S., Liang, S. L., . . . Li, L. M. (2018). Preoperative Heart Rate Variability as Predictors of Vagus Nerve Stimulation Outcome in Patients with Drug-resistant Epilepsy. *Sci Rep*, *8*(1), 3856. doi:10.1038/s41598-018-21669-3
- Liu, M., Song, C., Liang, Y., Knopfel, T., & Zhou, C. (2019). Assessing spatiotemporal variability of brain spontaneous activity by multiscale entropy and functional connectivity. *Neuroimage*, *198*, 198-220. doi:10.1016/j.neuroimage.2019.05.022
- Liu, Q., Chen, Y. F., Fan, S. Z., Abbod, M. F., & Shieh, J. S. (2015). EEG Signals Analysis Using Multiscale Entropy for Depth of Anesthesia Monitoring during Surgery through Artificial Neural Networks. *Computational and Mathematical Methods in Medicine*. doi:10.1155/2015/232381
- Liu, Q., Chen, Y. F., Fan, S. Z., Abbod, M. F., & Shieh, J. S. (2017). EEG artifacts reduction by multivariate empirical mode decomposition and multiscale entropy for monitoring depth of



- anaesthesia during surgery. *Medical & Biological Engineering & Computing*, 55(8), 1435-1450. doi:10.1007/s11517-016-1598-2
- Lu, W. Y., Chen, J. Y., Chang, C. F., Weng, W. C., Lee, W. T., & Shieh, J. S. (2015). Multiscale Entropy of Electroencephalogram as a Potential Predictor for the Prognosis of Neonatal Seizures. *Plos One*, 10(12). doi:10.1371/journal.pone.0144732
- McIntosh, A. R., Kovacevic, N., & Itier, R. J. (2008). Increased Brain Signal Variability Accompanies Lower Behavioral Variability in Development. *Plos Computational Biology*, 4(7). doi:10.1371/journal.pcbi.1000106
- McIntosh, A. R., Vakorin, V., Kovacevic, N., Wang, H., Diaconescu, A., & Protzner, A. B. (2014). Spatiotemporal Dependency of Age-Related Changes in Brain Signal Variability. *Cerebral Cortex*, 24(7), 1806-1817. doi:10.1093/cercor/bht030
- Misic, B., Doesburg, S. M., Fatima, Z., Vidal, J., Vakorin, V. A., Taylor, M. J., & McIntosh, A. R. (2015). Coordinated Information Generation and Mental Flexibility: Large-Scale Network Disruption in Children with Autism. *Cerebral Cortex*, 25(9), 2815-2827. doi:10.1093/cercor/bhu082
- Misic, B., Vakorin, V. A., Paus, T., & McIntosh, A. R. (2011). Functional embedding predicts the variability of neural activity. *Frontiers in Systems Neuroscience*, 5, 90. doi:10.3389/fnsys.2011.00090
- Miskovic, V., Owens, M., Kuntzelman, K., & Gibb, B. E. (2016). Charting moment-to-moment brain signal variability from early to late childhood. *Cortex*, 83, 51-61. doi:10.1016/j.cortex.2016.07.006
- Mizuno, T., Takahashi, T., Cho, R. Y., Kikuchi, M., Murata, T., Takahashi, K., & Wada, Y. (2010). Assessment of EEG dynamical complexity in Alzheimer's disease using multiscale entropy. *Clinical Neurophysiology*, 121(9), 1438-1446. doi:10.1016/j.clinph.2010.03.025
- Nazari, A., Alavimajd, H., Shakeri, N., Bakhshandeh, M., Faghihzadeh, E., & Marzbani, H. (2019). Prediction of Brain Connectivity Map in Resting-State fMRI Data Using Shrinkage Estimator. *Basic Clin Neurosci*, 10(2), 147-156. doi:10.32598/bcn.9.10.140
- Ouyang, G. X., Li, J., Liu, X. Z., & Li, X. L. (2013). Dynamic characteristics of absence EEG recordings with multiscale permutation entropy analysis. *Epilepsy Research*, 104(3), 246-252. doi:10.1016/j.eplepsyres.2012.11.003
- Park, J. H., Kim, S., Kim, C. H., Cichocki, A., & Kim, K. (2007). Multiscale entropy analysis of EEG from patients under different pathological conditions. *Fractals-Complex Geometry Patterns and Scaling in Nature and Society*, 15(4), 399-404. doi:10.1142/S0218348x07003691
- Puce, A., Berkovic, S. F., Cadusch, P. J., & Bladin, P. F. (1994). P3 latency jitter assessed using 2 techniques. I. Simulated data and surface recordings in normal subjects. *Electroencephalogr Clin Neurophysiol*, 92(4), 352-364. doi:10.1016/0168-5597(94)90103-1
- Raja Beharelle, A., Kovacevic, N., McIntosh, A. R., & Levine, B. (2012). Brain signal variability relates to stability of behavior after recovery from diffuse brain injury. *Neuroimage*, 60(2), 1528-1537. doi:10.1016/j.neuroimage.2012.01.037
- Richman, J. S., & Moorman, J. R. (2000). Physiological time-series analysis using approximate entropy and sample entropy. *American Journal of Physiology-Heart and Circulatory Physiology*, 278(6), H2039-H2049.
- Riedl, M., Muller, A., & Wessel, N. (2013). Practical considerations of permutation entropy. *European Physical Journal-Special Topics*, 222(2), 249-262. doi:10.1140/epjst/e2013-01862-7
- Roldan, E. M., Molina-Pico, A., Cuesta-Frau, D., Martinez, P. M., & Crespo, S. O. (2011). Characterization of entropy measures against data loss: application to EEG records. *Conf Proc IEEE Eng Med Biol Soc*, 2011, 6110-6113. doi:10.1109/iembs.2011.6091509
- Sinai, M., Phillips, N. A., Chertkow, H., & Kabani, N. J. (2010). Task switching performance reveals heterogeneity amongst patients with mild cognitive impairment. *Neuropsychology*, 24(6), 757-774. doi:10.1037/a0020314
- Sleimen-Malkoun, R., Perdakis, D., Muller, V., Blanc, J. L., Huys, R., Temprado, J. J., & Jirsa, V. K. (2015). Brain Dynamics of Aging: Multiscale Variability of EEG Signals at Rest and during an Auditory Oddball Task(1,2,3). *Eneuro*, 2(3). doi:10.1523/ENEURO.0067-14.2015
- Szostakiwskyj, J. M. H., Willatt, S. E., Cortese, F., & Protzner, A. B. (2017). The modulation of EEG variability between internally-and externally-driven cognitive states varies with maturation and task performance. *Plos One*, 12(7). doi:10.1371/journal.pone.0181894
- Takahashi, T., Cho, R., Mizuno, T., Kikuchi, M., Murata, T., Takahashi, K., & Wada, Y. (2010). Antipsychotics reverse abnormal EEG complexity in drug-naive schizophrenia: A multiscale entropy analysis. *International Journal of Neuropsychopharmacology*, 13, 242-243.
- Takahashi, T., Cho, R. Y., Murata, T., Mizuno, T., Kikuchi, M., Mizukami, K., . . . Wada, Y. (2009). Age-related variation in EEG complexity to photic stimulation: A multiscale entropy analysis. *Clinical Neurophysiology*, 120(3), 476-483. doi:10.1016/j.clinph.2008.12.043

- Takahashi, T., Yoshimura, Y., Hiraishi, H., Hasegawa, C., Munesue, T., Higashida, H., . . . Kikuchi, M. (2016). Enhanced brain signal variability in children with autism spectrum disorder during early childhood. *Human Brain Mapping, 37*(3), 1038-1050. doi:10.1002/hbm.23089
- Ueno, K., Takahashi, T., Takahashi, K., Mizukami, K., Tanaka, Y., & Wada, Y. (2015). Neurophysiological basis of creativity in healthy elderly people: A multiscale entropy approach. *Clinical Neurophysiology, 126*(3), 524-531. doi:10.1016/j.clinph.2014.06.032
- Valencia, J. F., Porta, A., Vallverdu, M., Claria, F., Baranowski, R., Orłowska-Baranowska, E., & Caminal, P. (2009). Refined Multiscale Entropy: Application to 24-h Holter Recordings of Heart Period Variability in Healthy and Aortic Stenosis Subjects. *Ieee Transactions on Biomedical Engineering, 56*(9), 2202-2213. doi:10.1109/Tbme.2009.2021986
- Verhaeghe, J., Gravel, P., & Reader, A. J. (2010). Task-oriented quantitative image reconstruction in emission tomography for single- and multi-subject studies. *Phys Med Biol, 55*(23), 7263-7285. doi:10.1088/0031-9155/55/23/006
- Wang, H., Pexman, P. M., Turner, G., Cortese, F., & Protzner, A. B. (2018). The relation between Scrabble expertise and brain aging as measured with EEG brain signal variability. *Neurobiology of Aging, 69*, 249-260. doi:10.1016/j.neurobiolaging.2018.05.015
- Wang, H. Y., McIntosh, A. R., Kovacevic, N., Karachalios, M., & Protzner, A. B. (2016). Age-related Multiscale Changes in Brain Signal Variability in Pre-task versus Post-task Resting-state EEG. *Journal of Cognitive Neuroscience, 28*(7), 971-984. doi:10.1162/jocn\_a\_00947
- Wei, Q., Li, Y., Fan, S. Z., Liu, Q., Abbod, M. F., Lu, C. W., . . . Shieh, J. S. (2014). A critical care monitoring system for depth of anaesthesia analysis based on entropy analysis and physiological information database. *Australasian Physical & Engineering Sciences in Medicine, 37*(3), 591-605. doi:10.1007/s13246-014-0285-6
- Weng, W. C., Jiang, G. J., Chang, C. F., Lu, W. Y., Lin, C. Y., Lee, W. T., & Shieh, J. S. (2015). Complexity of Multi-Channel Electroencephalogram Signal Analysis in Childhood Absence Epilepsy. *Plos One, 10*(8), e0134083. doi:10.1371/journal.pone.0134083
- Xu, Y., Cui, J., Hong, W., & Liang, H. (2015). [Automatic Classification of Epileptic Electroencephalogram Signal Based on Improved Multivariate Multiscale Entropy]. *Sheng Wu Yi Xue Gong Cheng Xue Za Zhi, 32*(2), 256-262.
- Yang, A. C., Wang, S. J., Lai, K. L., Tsai, C. F., Yang, C. H., Hwang, J. P., . . . Fuh, J. L. (2013). Cognitive and neuropsychiatric correlates of EEG dynamic complexity in patients with Alzheimer's disease. *Progress in Neuro-Psychopharmacology & Biological Psychiatry, 47*, 52-61. doi:10.1016/j.pnpbp.2013.07.022
- Zanin, M., Zunino, L., Rosso, O. A., & Papo, D. (2012). Permutation Entropy and Its Main Biomedical and Econophysics Applications: A Review. *Entropy, 14*(8), 1553-1577. doi:10.3390/e14081553
- Zavala-Yoe, R., Ramirez-Mendoza, R., & Cordero, L. M. (2015). Novel way to investigate evolution of children refractory epilepsy by complexity metrics in massive information. *Springerplus, 4*. doi:10.1186/s40064-015-1173-6

## Supplementary Information for

### Standard multiscale entropy reflects neural dynamics at mismatched temporal scales

Julian Q. Kosciessa, Niels A. Kloosterman, and Douglas D. Garrett

Email: [kosciessa@mpib-berlin.mpg.de](mailto:kosciessa@mpib-berlin.mpg.de); [garrett@mpib-berlin.mpg.de](mailto:garrett@mpib-berlin.mpg.de)

#### **S2 Text. Simulation of MSE's sensitivity to pink noise slope variation.**

Our simulations have focused on narrowband rhythmicity as one contributor to time series irregularity. However, MSE is theoretically sensitive to many features that add alter the irregularity of time series, with fixed  $1/f$  slopes. Due to the assumed contribution of variations in autocorrelative structure to signal irregularity, we systematically assessed the impact of variations in pink noise on MSE. For this purpose, we simulated 100 trials of 8 s segments with unit variance and varying pink noise ( $\frac{1}{f^x}$ ,  $x = [.5, 1, 1.2, 1.5]$ ) as generated using the function `f_alpha_gaussian` (Stoyanov, Gunzburger, & Burkaradt, 2011).

Previous simulations of the impact of varying slopes on 'Original' MSE have produced a multiscale sensitivity that we consider counterintuitive (e.g., Courtiol et al., 2016; Miskovic, Owens, Kuntzelman, & Gibb, 2016). For white noise signals ( $x = 0$ ), entropy decreases have been observed towards coarser scales, opposing the notion of 'scale-free' randomness. We and others (Nikulin & Brismar, 2004) argue that this results from increasingly mismatched similarity bounds. Our results closely replicate the traditional observations of scale-dependent entropy crossovers in 'Original' implementations (S7 Figure A), while adding that adequate scale-wise implementation of similarity bounds eliminates such cross-over effects (S7 Figure BC), and instead differentiates different autocorrelative structures by constant offsets in sample entropy (S7 Figure BCD). This result more closely reflects the notion of 'scale-free' irregularity. Notably, a bandpass implementation loses sensitivity to such broadband effects, as narrowband-filtered irregularity is equal across varying slopes (S7 Figure E).

#### **Supplementary References**

- Courtiol, J., Perdakis, D., Petkoski, S., Muller, V., Huys, R., Sleimen-Malkoun, R., & Jirsa, V. K. (2016). The multiscale entropy: Guidelines for use and interpretation in brain signal analysis. *Journal of Neuroscience Methods*, 273, 175-190. doi:10.1016/j.jneumeth.2016.09.004
- Miskovic, V., Owens, M., Kuntzelman, K., & Gibb, B. E. (2016). Charting moment-to-moment brain signal variability from early to late childhood. *Cortex*, 83, 51-61. doi:10.1016/j.cortex.2016.07.006
- Nikulin, V. V., & Brismar, T. (2004). Comment on "Multiscale entropy analysis of complex physiologic time series". *Physical Review Letters*, 92(8). doi:10.1103/PhysRevLett.92.089803
- Stoyanov, M., Gunzburger, M., & Burkaradt, J. (2011). Pink noise,  $1/f$  (alpha) noise, and their effect on solutions of differential equations. *International Journal for Uncertainty Quantification*, 1(3), 257-278. doi:10.1615/Int.J.UncertaintyQuantification.2011003089

## Supplementary Information for

### Standard multiscale entropy reflects neural dynamics at mismatched temporal scales

Julian Q. Kosciessa, Niels A. Kloosterman, and Douglas D. Garrett

Email: [kosciessa@mpib-berlin.mpg.de](mailto:kosciessa@mpib-berlin.mpg.de); [garrett@mpib-berlin.mpg.de](mailto:garrett@mpib-berlin.mpg.de)

#### **S3 Text. Surrogate analysis of age effects**

The use of multiscale entropy is at least in part motivated by its partial sensitivity to multi-scale, potentially non-linear, signal characteristics, such as phase shifts or cross-frequency coupling. However, the contribution of non-linear characteristics to MSE estimates and modulations thereof is unclear in practice. A principled way to dissociate non-linear signal characteristics from linear signal variance is to use phase-shuffled surrogate data (Garrett, Grandy, & Werkle-Bergner, 2014; Grandy, Garrett, Lindenberger, & Werkle-Bergner, 2013; McIntosh, Kovacevic, & Itier, 2008; Stam, 2005; Takens, 1993; Theiler, Eubank, Longtin, Galdrikian, & Farmer, 1992; Vakorin & McIntosh, 2012).

To probe whether linear contributions were sufficient to explain the main MSE age effects observed in our study, we created surrogate data and estimated 'Original' MSE – including a presumed similarity bound bias – as well as the low-pass variant that matches similarity bounds to the standard deviation of scale-specific signals. In line with previous surrogate analyses for entropy applications (Miskovic, MacDonald, Rhodes, & Cote, 2019), we used an iterated amplitude-adjusted Fourier transform (IAAFT), which minimizes the spurious detection of nonlinearity (Schreiber & Schmitz, 1996). In short, the IAAFT produces surrogate data with random phases, while the power spectrum and value distribution are iteratively approximated to the original data (for an example see S9 Figure A). We separately generated surrogate time series for each subject, channel and pseudo-trial, using a maximum number of 100 iterations until convergence.

Results in S9 Figure show that the surrogate data can recover the main age effects presented in Fig 7 A and C, indicating that linear properties are sufficient to account for the main age effects observed in the original data. This result coheres with a similar surrogate analysis of age effects in resting state data (Courtiol et al., 2016) and suggests at best limited non-linear contributions that were not necessary for the indicated age differences. However, this does not answer the question whether there are also age effects in non-linear contributions after controlling for linear characteristics. To answer this question, we calculated a surrogate ratio score as  $\frac{MSE (original)}{MSE (surrogate)}$ , in line with previous surrogate analyses (Miskovic et al., 2019; Schartner et al., 2017). While a score of 1 would indicate the absence of structured information, lower values suggest the presence of non-linear structure in the original data relative to the random structure of surrogates. In contrast with MSE for surrogates or original data only, this ratio indicated similar scale-dependent patterns across 'Original' and low-pass variants in average traces (S9 Figure D, E). At face value, average traces hinted at age-related increases in posterior fine-scale entropy, and age-related decreases in frontal coarse-scale entropy, in line with prior proposals of a shift from global-to-local processing with increased adult age (McIntosh, 2019). However, no significant clusters were indicated via cluster-based permutation tests at traditional thresholds (two-sided  $p = .025$ ). Even relaxing two-sided significance thresholds to  $p = .1$  only led to the indication of decreased sample entropy with age exclusively at very fine scales and central channels (not shown). We further assessed the correspondence of linear and non-linear effects to the 'Original' MSE age differences in fine- and coarse-scale clusters in the original data. We assessed t-value ratios to evaluate relative effect sizes. We exclusively probed results from the 'Original' implementation given that non-linear results were comparable across implementations. Linear contributions were approximated by t-values for the surrogate data, whereas non-linear contributions were estimated by t-values of the original/surrogate ratio, averaged within the fine- and coarse scale clusters. Linear contributions, approximated by t-values for the surrogate data, accounted for 98% of the original fine-scale effect size and 99% for the coarse-scale effect size. In stark contrast, non-linear contributions captured only .1 % of the original fine-scale effect size, and 20% of the coarse-scale effect size. These results underline that the evaluation of non-linear contributions requires stringent control for linear PSD properties to

evaluate. Smaller (potentially under-powered) non-linear contributions to age effects are further in line with previous surrogate analyses. Crucially, the absence of significant effects suggests that more statistical power is necessary to indicate smaller non-linear effects of interest in future work. Reassuringly, the similarity between surrogate ratio scores for different implementations underline the notion that surrogate analyses provide a powerful tool to identify non-linearities in the presence of linear power differences.

### Supplementary References

- Courtiol, J., Perdikis, D., Petkoski, S., Muller, V., Huys, R., Sleimen-Malkoun, R., & Jirsa, V. K. (2016). The multiscale entropy: Guidelines for use and interpretation in brain signal analysis. *Journal of Neuroscience Methods*, 273, 175-190. doi:10.1016/j.jneumeth.2016.09.004
- Garrett, D. D., Grandy, T. H., & Werkle-Bergner, M. (2014). *The neural forest and the trees: On distinguishing the variance of a brain signal from its information content*. Paper presented at the Annual Alpine Brain Imaging Meeting, Champéry, Switzerland.
- Grandy, T. H., Garrett, D. D., Lindenberger, U., & Werkle-Bergner, M. (2013). *Exploring the limits of complexity measures for the analysis of age differences in neural signals*. Paper presented at the Dallas Aging and Cognition Conference, Dallas, TX, USA.
- McIntosh, A. R. (2019). *Neurocognitive Aging and Brain Signal Complexity*: Oxford University Press.
- McIntosh, A. R., Kovacevic, N., & Itier, R. J. (2008). Increased Brain Signal Variability Accompanies Lower Behavioral Variability in Development. *Plos Computational Biology*, 4(7). doi:10.1371/journal.pcbi.1000106
- Miskovic, V., MacDonald, K. J., Rhodes, L. J., & Cote, K. A. (2019). Changes in EEG multiscale entropy and power-law frequency scaling during the human sleep cycle. *Human Brain Mapping*, 40(2), 538-551. doi:10.1002/hbm.24393
- Schartner, M. M., Pigorini, A., Gibbs, S. A., Arnulfo, G., Sarasso, S., Barnett, L., . . . Barrett, A. B. (2017). Global and local complexity of intracranial EEG decreases during NREM sleep. *Neurosci Conscious*, 2017(1), niw022. doi:10.1093/nc/niw022
- Schreiber, T., & Schmitz, A. (1996). Improved surrogate data for nonlinearity tests. *Physical Review Letters*, 77(4), 635-638. doi:DOI 10.1103/PhysRevLett.77.635
- Stam, C. J. (2005). Nonlinear dynamical analysis of EEG and MEG: review of an emerging field. *Clinical Neurophysiology*, 116(10), 2266-2301. doi:10.1016/j.clinph.2005.06.011
- Takens, F. (1993). Detecting Nonlinearities in Stationary Time Series. *International Journal of Bifurcation and Chaos*, 3(2), 241-256. doi:10.1142/S0218127493000192
- Theiler, J., Eubank, S., Longtin, A., Galdrikian, B., & Farmer, J. D. (1992). Testing for Nonlinearity in Time-Series - the Method of Surrogate Data. *Physica D-Nonlinear Phenomena*, 58(1-4), 77-94. doi:10.1016/0167-2789(92)90102-S
- Vakorin, V. A., & McIntosh, A. R. (2012). Mapping the Multiscale Information Content of Complex Brain Signals. *Principles of Brain Dynamics: Global State Interactions*, 183-208.
